# Supplementary material
Source: PubMed Central journal article supplement (PMC4238106)
Supplement: NIHMS637217-supplement-suppl_data.pdf [file NIHMS637217-supplement-suppl_data.pdf]

# Supplementary Figure 1.

## Protein band 4 (-Mn): PilC2

Variable modifications: Carbamidomethyl (C), Oxidation (M)  
 Cleavage by Trypsin: cuts C-term side of KR unless next residue is P  
 Sequence Coverage: 22%

Matched peptides shown in **Bold Red**

```

1 MFSHIGGGGQ AQAQIYKYAI VMNERKQPEV KWESQYNQSA LKDKGRERIF
51 SHISQKNRFG ITSNFISFNN NDELVSQQSG TAVFGIATYL PFGKVSQFDP
101 TABLNRKRGNA VNWIHTRPG LAGYGYDGIK CGSAQDCPKL TYKTRFSFDN
151 PDLVKTRGGI DRHTEPSREN SPIYKLDKHE WLGVSFNLGG EGTAKDRSS
201 SKLVSSFDEN NSNSNQNLVY TTEGHRISLG NWQRETTAMA YYLNAKLHLL
251 DKKQIKDIAQ GKTIVRLGVK PSIDVKIQNT GLSGLLNFW S KWDIKDNGQI
301 PVKLGLPQVK AVRCINTAHP NKTAQAFSPA LTAPALWFGP VQNGKQVMYS
351 ASVSTYPGSS SSRIFLQELK QTDPARPGR HSLAALDTQN IKSREPWFNS
401 RQTVIRLPGG VYKINPGKNG GRVAGINGND GKNDTFGIFK DRYVTEIDE
451 WSEMLLPWTA RYGNDDIFK TPNQPNSTQ NGKKQYSQKY RIRKEDDND
501 KFRDLGDIVN SPIVAVGGYL ATSDNGMVH IFKKTGTDER SYNKLSYIP
551 GIMERKDIEG NDSDLAKELR TFAEKGVVDG RYGVDGGFVR RRIIDQDQKQ
601 KHFFMFGAMG LGGRGAYALD LSKIDSSNLI GVSMDVQND KNNNNKNDN
651 NRVKLGIVTVG TPQIGKIQNG KYAAFLASGY AAKNIGSGDN TTALYVIDLG
701 NTLGTPIAKI EVKDGKGLS SPTLVKDKLD GTVDIAYAG RGNMYRFDL
751 SSDKPSENTV RTFEGGKPI TSAPAVSRLA DKRVVIFGTG SDLSEEDVIS
801 QDIQHVYGIF DNDTDMGAAQ DGQKGLLEQ NLMQENKTLF LNKRSDGSS
851 KGWVVKLREG ERVIVKPTVV LRTAFVIIRS YTGNDKCGAQ TAILGINTAD
901 GGALTPRSAR PIVPDHNSVA QVSGHKTKK GKSIPICME KGGTVCPIHG
951 YUYDKPVNVR YLDEKKTDDF PVTADGDAGG SGTFKESKKE ARNNRCFSKG
1001 GVRTLLMNDL DSLDTGPMC GIKRLSNREV FF
  
```

Score: 868

M<sub>r</sub>: 115036

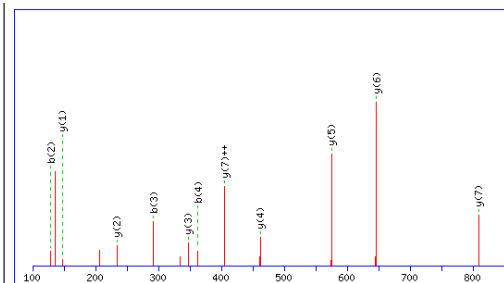

Monoisotopic mass of neutral peptide Mr(calc): 936.4916  
 Ions Score: 58 Expect: 0.029  
 Matches (**Bold Red**): 11/68 fragment ions using 18 most intense peaks

| # | b               | b <sup>++</sup> | b <sup>0</sup> | b <sup>0++</sup> | Seq.     | y               | y <sup>++</sup> | y <sup>*</sup> | y <sup>++</sup> | y <sup>0</sup> | y <sup>0++</sup> | # |
|---|-----------------|-----------------|----------------|------------------|----------|-----------------|-----------------|----------------|-----------------|----------------|------------------|---|
| 1 | 58.0287         | 29.5180         |                |                  | <b>G</b> |                 |                 |                |                 |                |                  | 9 |
| 2 | <b>129.0659</b> | 65.0366         |                |                  | <b>A</b> | 880.4775        | 440.7424        | 863.4509       | 432.2291        | 862.4669       | 431.7371         | 8 |
| 3 | <b>292.1292</b> | 146.5682        |                |                  | <b>Y</b> | <b>809.4403</b> | <b>405.2238</b> | 792.4138       | 396.7105        | 791.4298       | 396.2185         | 7 |
| 4 | <b>363.1663</b> | 182.0868        |                |                  | <b>A</b> | <b>646.3770</b> | 323.6921        | 629.3505       | 315.1789        | 628.3665       | 314.6869         | 6 |
| 5 | 476.2504        | 238.6288        |                |                  | <b>L</b> | <b>575.3399</b> | 288.1736        | 558.3134       | 279.6603        | 557.3293       | 279.1683         | 5 |
| 6 | 591.2773        | 296.1423        | 573.2667       | 287.1370         | <b>D</b> | <b>462.2558</b> | 231.6316        | 445.2293       | 223.1183        | 444.2453       | 222.6263         | 4 |
| 7 | 704.3614        | 352.6843        | 686.3508       | 343.6790         | <b>L</b> | <b>347.2289</b> | 174.1181        | 330.2023       | 165.6048        | 329.2183       | 165.1128         | 3 |
| 8 | 791.3934        | 396.2003        | 773.3828       | 387.1951         | <b>S</b> | <b>234.1448</b> | 117.5761        | 217.1183       | 109.0628        | 216.1343       | 108.5708         | 2 |
| 9 |                 |                 |                |                  | <b>K</b> | <b>147.1128</b> | 74.0600         | 130.0863       | 65.5468         |                |                  | 1 |

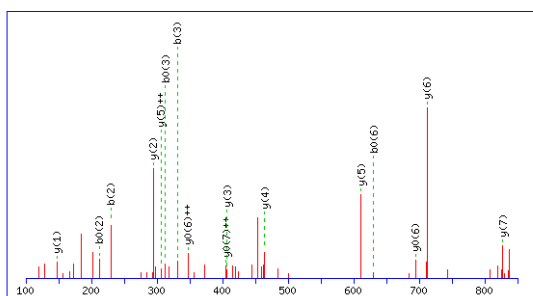

Monoisotopic mass of neutral peptide Mr(calc): 940.4654  
 Ions Score: 40 Expect: 1.8  
 Matches (**Bold Red**): 16/72 fragment ions using 42 most intense peaks

| # | b               | b <sup>++</sup> | b <sup>*</sup> | b <sup>++</sup> | b <sup>0</sup>  | b <sup>0++</sup> | Seq.     | y               | y <sup>++</sup> | y <sup>*</sup> | y <sup>++</sup> | y <sup>0</sup>  | y <sup>0++</sup> | # |
|---|-----------------|-----------------|----------------|-----------------|-----------------|------------------|----------|-----------------|-----------------|----------------|-----------------|-----------------|------------------|---|
| 1 | 115.0502        | 58.0287         | 98.0237        | 49.5155         |                 |                  | <b>N</b> |                 |                 |                |                 |                 |                  | 8 |
| 2 | <b>230.0771</b> | 115.5422        | 213.0506       | 107.0289        | <b>212.0666</b> | 106.5369         | <b>D</b> | <b>827.4298</b> | 414.2185        | 810.4032       | 405.7053        | 809.4192        | <b>405.2132</b>  | 7 |
| 3 | <b>331.1248</b> | 166.0661        | 314.0983       | 157.5528        | <b>313.1143</b> | 157.0608         | <b>T</b> | <b>712.4028</b> | 356.7051        | 695.3763       | 348.1918        | <b>694.3923</b> | <b>347.6998</b>  | 6 |
| 4 | 478.1932        | 239.6003        | 461.1667       | 231.0870        | 460.1827        | 230.5950         | <b>F</b> | <b>611.3552</b> | <b>306.1812</b> | 594.3286       | 297.6679        |                 |                  | 5 |
| 5 | 535.2147        | 268.1110        | 518.1882       | 259.5977        | 517.2041        | 259.1057         | <b>G</b> | <b>464.2867</b> | 232.6470        | 447.2602       | 224.1337        |                 |                  | 4 |
| 6 | 648.2988        | 324.6530        | 631.2722       | 316.1397        | <b>630.2882</b> | 315.6477         | <b>I</b> | <b>407.2653</b> | 204.1363        | 390.2387       | 195.6230        |                 |                  | 3 |
| 7 | 795.3672        | 398.1872        | 778.3406       | 389.6740        | 777.3566        | 389.1819         | <b>F</b> | <b>294.1812</b> | 147.5942        | 277.1547       | 139.0810        |                 |                  | 2 |
| 8 |                 |                 |                |                 |                 |                  | <b>K</b> | <b>147.1128</b> | 74.0600         | 130.0863       | 65.5468         |                 |                  | 1 |

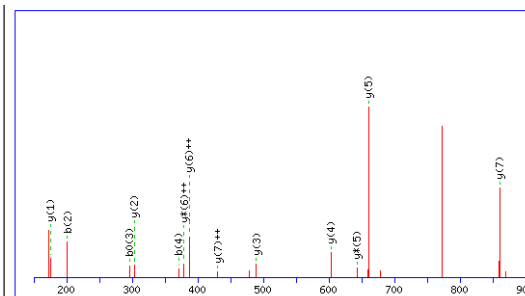

Monoisotopic mass of neutral peptide Mr(calc): 972.5141  
 Ions Score: 50 Expect: 0.19  
 Matches (**Bold Red**): 13/62 fragment ions using 19 most intense peaks

| # | b               | b <sup>++</sup> | b <sup>*</sup> | b <sup>++</sup> | b <sup>0</sup>  | b <sup>0++</sup> | Seq.     | y               | y <sup>++</sup> | y <sup>*</sup>  | y <sup>++</sup> | y <sup>0</sup> | y <sup>0++</sup> | # |
|---|-----------------|-----------------|----------------|-----------------|-----------------|------------------|----------|-----------------|-----------------|-----------------|-----------------|----------------|------------------|---|
| 1 | 114.0913        | 57.5493         |                |                 |                 |                  | <b>I</b> |                 |                 |                 |                 |                |                  | 8 |
| 2 | <b>201.1234</b> | 101.0653        |                |                 | 183.1128        | 92.0600          | <b>S</b> | <b>860.4373</b> | <b>430.7223</b> | 843.4108        | 422.2090        | 842.4268       | 421.7170         | 7 |
| 3 | 314.2074        | 157.6074        |                |                 | <b>296.1969</b> | 148.6021         | <b>L</b> | 773.4053        | <b>387.2063</b> | 756.3787        | <b>378.6930</b> |                |                  | 6 |
| 4 | <b>371.2289</b> | 186.1181        |                |                 | 353.2183        | 177.1128         | <b>G</b> | <b>660.3212</b> | 330.6643        | <b>643.2947</b> | 322.1510        |                |                  | 5 |
| 5 | 485.2718        | 243.1395        | 468.2453       | 234.6263        | 467.2613        | 234.1343         | <b>N</b> | <b>603.2998</b> | 302.1535        | 586.2732        | 293.6402        |                |                  | 4 |
| 6 | 671.3511        | 336.1792        | 654.3246       | 327.6659        | 653.3406        | 327.1739         | <b>W</b> | <b>489.2568</b> | 245.1321        | 472.2303        | 236.6188        |                |                  | 3 |
| 7 | 799.4097        | 400.2085        | 782.3832       | 391.6952        | 781.3991        | 391.2032         | <b>Q</b> | <b>303.1775</b> | 152.0924        | 286.1510        | 143.5791        |                |                  | 2 |
| 8 |                 |                 |                |                 |                 |                  | <b>R</b> | <b>175.1190</b> | 88.0631         | 158.0924        | 79.5498         |                |                  | 1 |

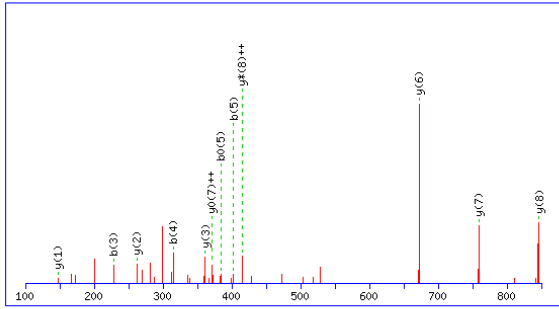

Monoisotopic mass of neutral peptide Mr(calc): 1072.5764  
 Ions Score: 34 Expect: 7.1  
 Matches (Bold Red): 12/92 fragment ions using 27 most intense peaks

| #  | b               | b <sup>++</sup> | b <sup>0</sup>  | b <sup>0++</sup> | Seq. | y               | y <sup>++</sup> | y <sup>*</sup> | y <sup>+++</sup> | y <sup>0</sup> | y <sup>0++</sup> | #  |
|----|-----------------|-----------------|-----------------|------------------|------|-----------------|-----------------|----------------|------------------|----------------|------------------|----|
| 1  | 58.0287         | 29.5180         |                 |                  | G    |                 |                 |                |                  |                |                  | 11 |
| 2  | 115.0502        | 58.0287         |                 |                  | G    | 1016.5623       | 508.7848        | 999.5357       | 500.2715         | 998.5517       | 499.7795         | 10 |
| 3  | <b>228.1343</b> | 114.5708        |                 |                  | L    | 959.5408        | 480.2740        | 942.5142       | 471.7608         | 941.5302       | 471.2687         | 9  |
| 4  | <b>315.1663</b> | 158.0868        | 297.1557        | 149.0815         | S    | <b>846.4567</b> | 423.7320        | 829.4302       | <b>415.2187</b>  | 828.4462       | 414.7267         | 8  |
| 5  | <b>402.1983</b> | 201.6028        | <b>384.1878</b> | 192.5975         | S    | <b>759.4247</b> | 380.2160        | 742.3981       | 371.7027         | 741.4141       | <b>371.2107</b>  | 7  |
| 6  | 499.2511        | 250.1292        | 481.2405        | 241.1239         | P    | <b>672.3927</b> | 336.7000        | 655.3661       | 328.1867         | 654.3821       | 327.6947         | 6  |
| 7  | 600.2988        | 300.6530        | 582.2882        | 291.6477         | T    | 575.3399        | 288.1736        | 558.3134       | 279.6603         | 557.3293       | 279.1683         | 5  |
| 8  | 713.3828        | 357.1951        | 695.3723        | 348.1898         | L    | 474.2922        | 237.6498        | 457.2657       | 229.1365         | 456.2817       | 228.6445         | 4  |
| 9  | 812.4512        | 406.7293        | 794.4407        | 397.7240         | V    | <b>361.2082</b> | 181.1077        | 344.1816       | 172.5944         | 343.1976       | 172.1024         | 3  |
| 10 | 927.4782        | 464.2427        | 909.4676        | 455.2374         | D    | <b>262.1397</b> | 131.5735        | 245.1132       | 123.0602         | 244.1292       | 122.5682         | 2  |
| 11 |                 |                 |                 |                  | K    | <b>147.1128</b> | 74.0600         | 130.0863       | 65.5468          |                |                  | 1  |

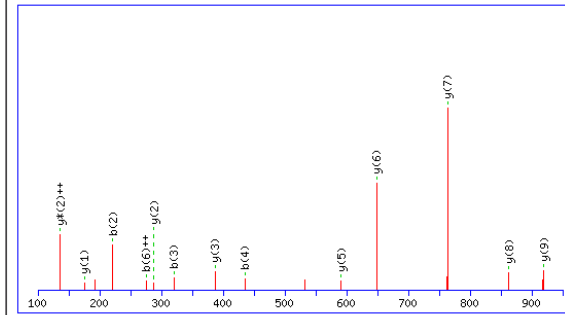

Monoisotopic mass of neutral peptide Mr(calc): 1081.5557  
 Ions Score: 78 Expect: 0.00025  
 Matches (Bold Red): 13/72 fragment ions using 17 most intense peaks

| #  | b               | b <sup>++</sup> | b <sup>0</sup> | b <sup>0++</sup> | Seq. | y               | y <sup>++</sup> | y <sup>*</sup> | y <sup>+++</sup> | y <sup>0</sup> | y <sup>0++</sup> | #  |
|----|-----------------|-----------------|----------------|------------------|------|-----------------|-----------------|----------------|------------------|----------------|------------------|----|
| 1  | 164.0706        | 82.5389         |                |                  | Y    |                 |                 |                |                  |                |                  | 10 |
| 2  | <b>221.0921</b> | 111.0497        |                |                  | G    | <b>919.4996</b> | 460.2534        | 902.4730       | 451.7402         | 901.4890       | 451.2482         | 9  |
| 3  | <b>320.1605</b> | 160.5839        |                |                  | V    | <b>862.4781</b> | 431.7427        | 845.4516       | 423.2294         | 844.4676       | 422.7374         | 8  |
| 4  | <b>435.1874</b> | 218.0974        | 417.1769       | 209.0921         | D    | <b>763.4097</b> | 382.2085        | 746.3832       | 373.6952         | 745.3991       | 373.2032         | 7  |
| 5  | 492.2089        | 246.6081        | 474.1983       | 237.6028         | G    | <b>648.3828</b> | 324.6950        | 631.3562       | 316.1817         |                |                  | 6  |
| 6  | 549.2304        | <b>275.1188</b> | 531.2198       | 266.1135         | G    | <b>591.3613</b> | 296.1843        | 574.3348       | 287.6710         |                |                  | 5  |
| 7  | 696.2988        | 348.6530        | 678.2882       | 339.6477         | F    | 534.3398        | 267.6736        | 517.3133       | 259.1603         |                |                  | 4  |
| 8  | 795.3672        | 398.1872        | 777.3566       | 389.1819         | V    | <b>387.2714</b> | 194.1394        | 370.2449       | 185.6261         |                |                  | 3  |
| 9  | 908.4512        | 454.7293        | 890.4407       | 445.7240         | L    | <b>288.2030</b> | 144.6051        | 271.1765       | <b>136.0919</b>  |                |                  | 2  |
| 10 |                 |                 |                |                  | R    | <b>175.1190</b> | 88.0631         | 158.0924       | 79.5498          |                |                  | 1  |

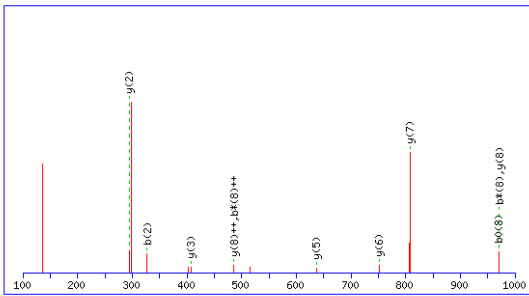

Monoisotopic mass of neutral peptide Mr(calc): 1133.5029  
 Ions Score: 34 Expect: 6.7  
 Matches (Bold Red): 11/76 fragment ions using 14 most intense peaks

| # | b               | b <sup>++</sup> | b <sup>*</sup>  | b <sup>+++</sup> | b <sup>0</sup>  | b <sup>0++</sup> | Seq. | y               | y <sup>++</sup> | y <sup>*</sup> | y <sup>+++</sup> | y <sup>0</sup> | y <sup>0++</sup> | # |
|---|-----------------|-----------------|-----------------|------------------|-----------------|------------------|------|-----------------|-----------------|----------------|------------------|----------------|------------------|---|
| 1 | 164.0706        | 82.5389         |                 |                  |                 |                  | Y    |                 |                 |                |                  |                |                  | 9 |
| 2 | <b>327.1339</b> | 164.0706        |                 |                  |                 |                  | Y    | <b>971.4469</b> | <b>486.2271</b> | 954.4203       | 477.7138         | 953.4363       | 477.2218         | 8 |
| 3 | 384.1554        | 192.5813        |                 |                  |                 |                  | G    | <b>808.3836</b> | 404.6954        | 791.3570       | 396.1821         | 790.3730       | 395.6901         | 7 |
| 4 | 498.1983        | 249.6028        | 481.1718        | 241.0895         |                 |                  | N    | <b>751.3621</b> | 376.1847        | 734.3355       | 367.6714         | 733.3515       | 367.1794         | 6 |
| 5 | 613.2253        | 307.1163        | 596.1987        | 298.6030         | 595.2147        | 298.1110         | D    | <b>637.3192</b> | 319.1632        | 620.2926       | 310.6499         | 619.3086       | 310.1579         | 5 |
| 6 | 728.2522        | 364.6297        | 711.2257        | 356.1165         | 710.2416        | 355.6245         | D    | 522.2922        | 261.6498        | 505.2657       | 253.1365         | 504.2817       | 252.6445         | 4 |
| 7 | 841.3363        | 421.1718        | 824.3097        | 412.6585         | 823.3257        | 412.1665         | I    | <b>407.2653</b> | 204.1363        | 390.2387       | 195.6230         |                |                  | 3 |
| 8 | 988.4047        | 494.7060        | <b>971.3781</b> | <b>486.1927</b>  | <b>970.3941</b> | 485.7007         | F    | <b>294.1812</b> | 147.5942        | 277.1547       | 139.0810         |                |                  | 2 |
| 9 |                 |                 |                 |                  |                 |                  | K    | <b>147.1128</b> | 74.0600         | 130.0863       | 65.5468          |                |                  | 1 |

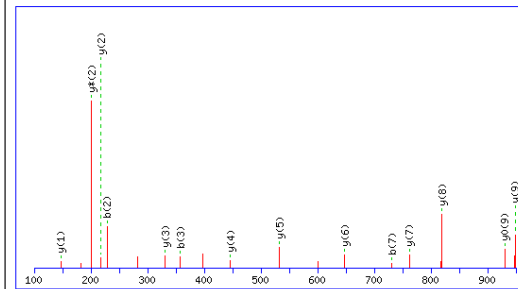

Monoisotopic mass of neutral peptide Mr(calc): 1175.5306  
 Ions Score: 80 Expect: 0.00017  
 Matches (Bold Red): 14/106 fragment ions using 21 most intense peaks

| #  | b               | b <sup>++</sup> | b <sup>*</sup> | b <sup>+++</sup> | b <sup>0</sup> | b <sup>0++</sup> | Seq.     | y               | y <sup>++</sup> | y <sup>*</sup>  | y <sup>+++</sup> | y <sup>0</sup> | y <sup>0++</sup> | #        |    |
|----|-----------------|-----------------|----------------|------------------|----------------|------------------|----------|-----------------|-----------------|-----------------|------------------|----------------|------------------|----------|----|
| 1  | 116.0342        | 58.5207         |                |                  |                | 98.0237          | 49.5155  | D               |                 |                 |                  |                |                  | 11       |    |
| 2  | <b>229.1183</b> | 115.0628        |                |                  |                | 211.1077         | 106.0575 | I               | 1061.5109       | 531.2591        | 1044.4844        | 522.7458       | 1043.5004        | 522.2538 | 10 |
| 3  | <b>358.1609</b> | 179.5841        |                |                  |                | 340.1503         | 170.5788 | E               | <b>948.4269</b> | 474.7171        | 931.4003         | 466.2038       | <b>930.4163</b>  | 465.7118 | 9  |
| 4  | 415.1823        | 208.0948        |                |                  |                | 397.1718         | 199.0895 | G               | <b>819.3843</b> | 410.1958        | 802.3577         | 401.6825       | 801.3737         | 401.1905 | 8  |
| 5  | 529.2253        | 265.1163        | 512.1987       | 256.6030         | 511.2147       | 256.1110         | N        | <b>762.3628</b> | 381.6850        | 745.3363        | 373.1718         | 744.3523       | 372.6798         | 7        |    |
| 6  | 644.2522        | 322.6297        | 627.2257       | 314.1165         | 626.2416       | 313.6245         | D        | <b>648.3199</b> | 324.6636        | 631.2933        | 316.1503         | 630.3093       | 315.6583         | 6        |    |
| 7  | <b>731.2842</b> | 366.1458        | 714.2577       | 357.6325         | 713.2737       | 357.1405         | S        | <b>533.2930</b> | 267.1501        | 516.2664        | 258.6368         | 515.2824       | 258.1448         | 5        |    |
| 8  | 846.3112        | 423.6592        | 829.2846       | 415.1460         | 828.3006       | 414.6539         | D        | <b>446.2609</b> | 223.6341        | 429.2344        | 215.1208         | 428.2504       | 214.6288         | 4        |    |
| 9  | 959.3952        | 480.2013        | 942.3687       | 471.6880         | 941.3847       | 471.1960         | L        | <b>331.2340</b> | 166.1206        | 314.2074        | 157.6074         |                |                  | 3        |    |
| 10 | 1030.4324       | 515.7198        | 1013.4058      | 507.2065         | 1012.4218      | 506.7145         | A        | <b>218.1499</b> | 109.5786        | <b>201.1234</b> | 101.0653         |                |                  | 2        |    |
| 11 |                 |                 |                |                  |                |                  | K        | <b>147.1128</b> | 74.0600         | 130.0863        | 65.5468          |                |                  | 1        |    |

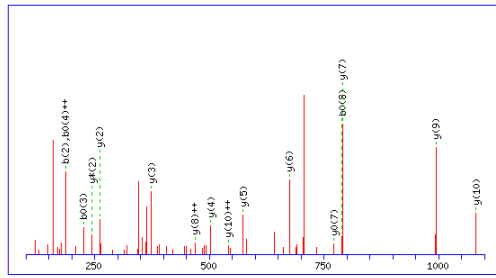

Monoisotopic mass of neutral peptide Mr(calc): 1179.5772  
 Ions Score: 64 Expect: 0.0067  
 Matches (Bold Red): 17/94 fragment ions using 24 most intense peaks

| #  | b               | b <sup>++</sup> | b <sup>*</sup> | b <sup>+++</sup> | b <sup>0</sup>  | b <sup>0++</sup> | Seq. | y                | y <sup>++</sup> | y <sup>*</sup>  | y <sup>+++</sup> | y <sup>0</sup>  | y <sup>0++</sup> | #  |
|----|-----------------|-----------------|----------------|------------------|-----------------|------------------|------|------------------|-----------------|-----------------|------------------|-----------------|------------------|----|
| 1  | 100.0757        | 50.5415         |                |                  |                 |                  | V    |                  |                 |                 |                  |                 |                  | 11 |
| 2  | <b>187.1077</b> | 94.0575         |                |                  | 169.0972        | 85.0522          | S    | <b>1081.5160</b> | <b>541.2617</b> | 1064.4895       | 532.7484         | 1063.5055       | 532.2564         | 10 |
| 3  | <b>244.1292</b> | 122.5682        |                |                  | <b>226.1186</b> | 113.5629         | G    | <b>994.4840</b>  | 497.7456        | 977.4575        | 489.2324         | 976.4734        | 488.7404         | 9  |
| 4  | 391.1976        | 196.1024        |                |                  | 373.1870        | <b>187.0972</b>  | F    | 937.4625         | <b>469.2349</b> | 920.4360        | 460.7216         | 919.4520        | 460.2296         | 8  |
| 5  | 506.2245        | 253.6159        |                |                  | 488.2140        | 244.6106         | D    | <b>790.3941</b>  | 395.7007        | 773.3676        | 387.1874         | <b>772.3836</b> | 386.6954         | 7  |
| 6  | 607.2722        | 304.1397        |                |                  | 589.2617        | 295.1345         | T    | <b>675.3672</b>  | 338.1872        | 658.3406        | 329.6740         | 657.3566        | 329.1819         | 6  |
| 7  | 678.3093        | 339.6583        |                |                  | 660.2988        | 330.6530         | A    | <b>574.3195</b>  | 287.6634        | 557.2930        | 279.1501         | 556.3089        | 278.6581         | 5  |
| 8  | 807.3519        | 404.1796        |                |                  | <b>789.3414</b> | 395.1743         | E    | <b>503.2824</b>  | 252.1448        | 486.2558        | 243.6316         | 485.2718        | 243.1395         | 4  |
| 9  | 920.4360        | 460.7216        |                |                  | 902.4254        | 451.7164         | L    | <b>374.2398</b>  | 187.6235        | 357.2132        | 179.1103         |                 |                  | 3  |
| 10 | 1034.4789       | 517.7431        | 1017.4524      | 509.2298         | 1016.4684       | 508.7378         | N    | <b>261.1557</b>  | 131.0815        | <b>244.1292</b> | 122.5682         |                 |                  | 2  |
| 11 |                 |                 |                |                  |                 |                  | K    | 147.1128         | 74.0600         | 130.0863        | 65.5468          |                 |                  | 1  |

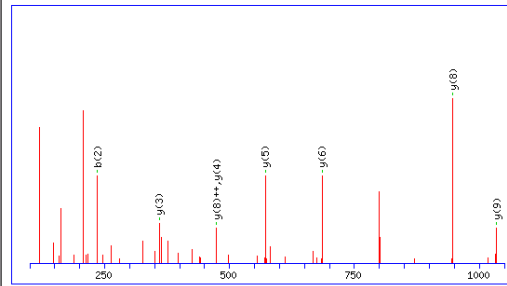

Monoisotopic mass of neutral peptide Mr(calc): 1180.5764  
 Ions Score: 48 Expect: 0.28  
 Matches (Bold Red): 8/92 fragment ions using 13 most intense peaks

| #  | b               | b <sup>++</sup> | b <sup>*</sup> | b <sup>+++</sup> | b <sup>0</sup> | b <sup>0++</sup> | Seq. | y                | y <sup>++</sup> | y <sup>*</sup> | y <sup>+++</sup> | y <sup>0</sup> | y <sup>0++</sup> | #  |
|----|-----------------|-----------------|----------------|------------------|----------------|------------------|------|------------------|-----------------|----------------|------------------|----------------|------------------|----|
| 1  | 148.0757        | 74.5415         |                |                  |                |                  | F    |                  |                 |                |                  |                |                  | 10 |
| 2  | <b>235.1077</b> | 118.0575        |                |                  | 217.0972       | 109.0522         | S    | <b>1034.5153</b> | 517.7613        | 1017.4888      | 509.2480         | 1016.5047      | 508.7560         | 9  |
| 3  | 382.1761        | 191.5917        |                |                  | 364.1656       | 182.5864         | F    | <b>947.4833</b>  | <b>474.2453</b> | 930.4567       | 465.7320         | 929.4727       | 465.2400         | 8  |
| 4  | 497.2031        | 249.1052        |                |                  | 479.1925       | 240.0999         | D    | 800.4149         | 400.7111        | 783.3883       | 392.1978         | 782.4043       | 391.7058         | 7  |
| 5  | 611.2460        | 306.1266        | 594.2195       | 297.6134         | 593.2354       | 297.1214         | N    | <b>685.3879</b>  | 343.1976        | 668.3614       | 334.6843         | 667.3774       | 334.1923         | 6  |
| 6  | 708.2988        | 354.6530        | 691.2722       | 346.1397         | 690.2882       | 345.6477         | P    | <b>571.3450</b>  | 286.1761        | 554.3184       | 277.6629         | 553.3344       | 277.1709         | 5  |
| 7  | 823.3257        | 412.1665        | 806.2992       | 403.6532         | 805.3151       | 403.1612         | D    | <b>474.2922</b>  | 237.6498        | 457.2657       | 229.1365         | 456.2817       | 228.6445         | 4  |
| 8  | 936.4098        | 468.7085        | 919.3832       | 460.1953         | 918.3992       | 459.7032         | L    | <b>359.2653</b>  | 180.1363        | 342.2387       | 171.6230         |                |                  | 3  |
| 9  | 1035.4782       | 518.2427        | 1018.4516      | 509.7295         | 1017.4676      | 509.2374         | V    | 246.1812         | 123.5942        | 229.1547       | 115.0810         |                |                  | 2  |
| 10 |                 |                 |                |                  |                |                  | K    | 147.1128         | 74.0600         | 130.0863       | 65.5468          |                |                  | 1  |

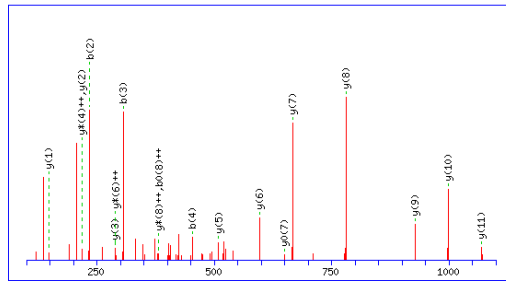

Monoisotopic mass of neutral peptide Mr(calc): 1231.6237  
 Ions Score: 53 Expect: 0.084  
 Matches (Bold Red): 18/88 fragment ions using 48 most intense peaks

| #  | b               | b <sup>++</sup> | b <sup>0</sup> | b <sup>0++</sup> | Seq. | y                | y <sup>++</sup> | y <sup>*</sup> | y <sup>+++</sup> | y <sup>0</sup>  | y <sup>0++</sup> | #  |
|----|-----------------|-----------------|----------------|------------------|------|------------------|-----------------|----------------|------------------|-----------------|------------------|----|
| 1  | 164.0706        | 82.5389         |                |                  | Y    |                  |                 |                |                  |                 |                  | 12 |
| 2  | <b>235.1077</b> | 118.0575        |                |                  | A    | <b>1069.5677</b> | 535.2875        | 1052.5411      | 526.7742         | 1051.5571       | 526.2822         | 11 |
| 3  | <b>306.1448</b> | 153.5761        |                |                  | A    | <b>998.5306</b>  | 499.7689        | 981.5040       | 491.2556         | 980.5200        | 490.7636         | 10 |
| 4  | <b>453.2132</b> | 227.1103        |                |                  | F    | <b>927.4934</b>  | 464.2504        | 910.4669       | 455.7371         | 909.4829        | 455.2451         | 9  |
| 5  | 566.2973        | 283.6523        |                |                  | L    | <b>780.4250</b>  | 390.7162        | 763.3985       | <b>382.2029</b>  | 762.4145        | 381.7109         | 8  |
| 6  | 637.3344        | 319.1709        |                |                  | A    | <b>667.3410</b>  | 334.1741        | 650.3144       | 325.6608         | <b>649.3304</b> | 325.1688         | 7  |
| 7  | 724.3665        | 362.6869        | 706.3559       | 353.6816         | S    | <b>596.3039</b>  | 298.6556        | 579.2773       | <b>290.1423</b>  | 578.2933        | 289.6503         | 6  |
| 8  | 781.3879        | 391.1976        | 763.3774       | <b>382.1923</b>  | G    | <b>509.2718</b>  | 255.1396        | 492.2453       | 246.6263         |                 |                  | 5  |
| 9  | 944.4512        | 472.7293        | 926.4407       | 463.7240         | Y    | 452.2504         | 226.6288        | 435.2238       | <b>218.1155</b>  |                 |                  | 4  |
| 10 | 1015.4884       | 508.2478        | 997.4778       | 499.2425         | A    | <b>289.1870</b>  | 145.0972        | 272.1605       | 136.5839         |                 |                  | 3  |
| 11 | 1086.5255       | 543.7664        | 1068.5149      | 534.7611         | A    | <b>218.1499</b>  | 109.5786        | 201.1234       | 101.0653         |                 |                  | 2  |
| 12 |                 |                 |                |                  | K    | 147.1128         | 74.0600         | 130.0863       | 65.5468          |                 |                  | 1  |

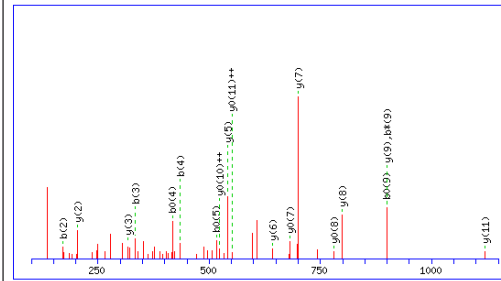

Monoisotopic mass of neutral peptide Mr(calc): 1232.6765  
 Ions Score: 49 Expect: 0.24  
 Matches (Bold Red): 19/100 fragment ions using 37 most intense peaks

| #  | b               | b <sup>++</sup> | b <sup>*</sup> | b <sup>+++</sup> | b <sup>0</sup>  | b <sup>0++</sup> | Seq. | y                | y <sup>++</sup> | y <sup>*</sup> | y <sup>+++</sup> | y <sup>0</sup>  | y <sup>0++</sup> | #  |
|----|-----------------|-----------------|----------------|------------------|-----------------|------------------|------|------------------|-----------------|----------------|------------------|-----------------|------------------|----|
| 1  | 114.0913        | 57.5493         |                |                  |                 |                  | L    |                  |                 |                |                  |                 |                  | 12 |
| 2  | <b>171.1128</b> | 86.0600         |                |                  |                 |                  | G    | <b>1120.5997</b> | 560.8035        | 1103.5732      | 552.2902         | 1102.5891       | <b>551.7982</b>  | 11 |
| 3  | <b>334.1761</b> | 167.5917        |                |                  |                 |                  | Y    | 1063.5782        | 532.2928        | 1046.5517      | 523.7795         | 1045.5677       | <b>523.2875</b>  | 10 |
| 4  | <b>435.2238</b> | 218.1155        |                |                  | 417.2132        | 209.1103         | T    | <b>900.5149</b>  | 450.7611        | 883.4884       | 442.2478         | 882.5043        | 441.7558         | 9  |
| 5  | 534.2922        | 267.6498        |                |                  | 516.2817        | 258.6445         | V    | <b>799.4672</b>  | 400.2373        | 782.4407       | 391.7240         | <b>781.4567</b> | 391.2320         | 8  |
| 6  | 591.3137        | 296.1605        |                |                  | 573.3031        | 287.1552         | G    | <b>700.3988</b>  | 350.7030        | 683.3723       | 342.1898         | <b>682.3883</b> | 341.6978         | 7  |
| 7  | 692.3614        | 346.6843        |                |                  | 674.3508        | 337.6790         | T    | <b>643.3774</b>  | 322.1923        | 626.3508       | 313.6790         | 625.3668        | 313.1870         | 6  |
| 8  | 789.4141        | 395.2107        |                |                  | 771.4036        | 386.2054         | P    | <b>542.3297</b>  | 271.6685        | 525.3031       | 263.1552         |                 |                  | 5  |
| 9  | 917.4727        | 459.2400        | 900.4462       | 450.7267         | <b>899.4621</b> | 450.2347         | Q    | 445.2769         | 223.1421        | 428.2504       | 214.6288         |                 |                  | 4  |
| 10 | 1030.5568       | 515.7820        | 1013.5302      | 507.2688         | 1012.5462       | 506.7767         | I    | <b>317.2183</b>  | 159.1128        | 300.1918       | 150.5995         |                 |                  | 3  |
| 11 | 1087.5782       | 544.2928        | 1070.5517      | 535.7795         | 1069.5677       | 535.2875         | G    | <b>204.1343</b>  | 102.5708        | 187.1077       | 94.0575          |                 |                  | 2  |
| 12 |                 |                 |                |                  |                 |                  | K    | 147.1128         | 74.0600         | 130.0863       | 65.5468          |                 |                  | 1  |

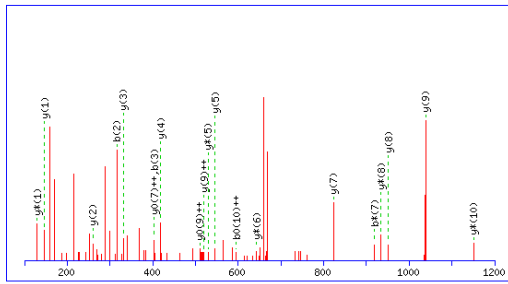

Monoisotopic mass of neutral peptide Mr(calc): 1352.6360  
 Ions Score: 43 Expect: 0.84  
 Matches (Bold Red): 20/106 fragment ions using 47 most intense peaks

| #  | b               | b <sup>++</sup> | b <sup>*</sup>  | b <sup>+++</sup> | b <sup>0</sup> | b <sup>0++</sup> | Seq. | y                | y <sup>++</sup> | y <sup>*</sup>   | y <sup>+++</sup> | y <sup>0</sup> | y <sup>0++</sup> | #  |
|----|-----------------|-----------------|-----------------|------------------|----------------|------------------|------|------------------|-----------------|------------------|------------------|----------------|------------------|----|
| 1  | 187.0866        | 94.0469         |                 |                  |                |                  | W    |                  |                 |                  |                  |                |                  | 11 |
| 2  | <b>316.1292</b> | 158.5682        |                 |                  | 298.1186       | 149.5629         | E    | 1167.5640        | 584.2857        | <b>1150.5375</b> | 575.7724         | 1149.5535      | 575.2804         | 10 |
| 3  | <b>403.1612</b> | 202.0842        |                 |                  | 385.1506       | 193.0790         | S    | <b>1038.5214</b> | <b>519.7644</b> | 1021.4949        | 511.2511         | 1020.5109      | <b>510.7591</b>  | 9  |
| 4  | 531.2198        | 266.1135        | 514.1932        | 257.6003         | 513.2092       | 257.1082         | Q    | <b>951.4894</b>  | 476.2483        | <b>934.4629</b>  | 467.7351         | 933.4789       | 467.2431         | 8  |
| 5  | 694.2831        | 347.6452        | 677.2566        | 339.1319         | 676.2726       | 338.6399         | Y    | <b>823.4308</b>  | 412.2191        | 806.4043         | 403.7058         | 805.4203       | <b>403.2138</b>  | 7  |
| 6  | 808.3260        | 404.6667        | 791.2995        | 396.1534         | 790.3155       | 395.6614         | N    | 660.3675         | 330.6874        | <b>643.3410</b>  | 322.1741         | 642.3569       | 321.6821         | 6  |
| 7  | 936.3846        | 468.6959        | <b>919.3581</b> | 460.1827         | 918.3741       | 459.6907         | Q    | <b>546.3246</b>  | 273.6659        | <b>529.2980</b>  | 265.1527         | 528.3140       | 264.6606         | 5  |
| 8  | 1023.4167       | 512.2120        | 1006.3901       | 503.6987         | 1005.4061      | 503.2067         | S    | <b>418.2660</b>  | 209.6366        | 401.2395         | 201.1234         | 400.2554       | 200.6314         | 4  |
| 9  | 1094.4538       | 547.7305        | 1077.4272       | 539.2172         | 1076.4432      | 538.7252         | A    | <b>331.2340</b>  | 166.1206        | 314.2074         | 157.6074         |                |                  | 3  |
| 10 | 1207.5378       | 604.2726        | 1190.5113       | 595.7593         | 1189.5273      | <b>595.2673</b>  | L    | <b>260.1969</b>  | 130.6021        | 243.1703         | 122.0888         |                |                  | 2  |
| 11 |                 |                 |                 |                  |                |                  | K    | <b>147.1128</b>  | 74.0600         | <b>130.0863</b>  | 65.5468          |                |                  | 1  |

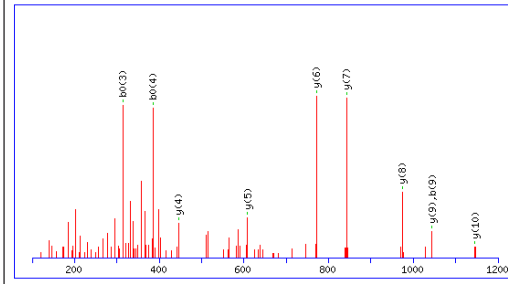

Monoisotopic mass of neutral peptide Mr(calc): 1374.6489  
 Ions Score: 61 Expect: 0.012  
 Matches (Bold Red): 10/96 fragment ions using 15 most intense peaks

| #  | b                | b <sup>++</sup> | b <sup>*</sup> | b <sup>+++</sup> | b <sup>0</sup> | b <sup>0++</sup> | Seq. | y | y <sup>++</sup> | y <sup>*</sup> | y <sup>+++</sup> | y <sup>0</sup>  | y <sup>0++</sup> | #  |
|----|------------------|-----------------|----------------|------------------|----------------|------------------|------|---|-----------------|----------------|------------------|-----------------|------------------|----|
| 1  | 130.0499         | 65.5286         |                |                  |                |                  | E    |   |                 |                |                  | 112.0393        | 56.5233          | 12 |
| 2  | 231.0975         | 116.0524        |                |                  |                |                  | T    |   |                 |                |                  | 213.0870        | 107.0471         | 11 |
| 3  | 332.1452         | 166.5763        |                |                  |                |                  | T    |   |                 |                |                  | <b>314.1347</b> | 157.5710         | 10 |
| 4  | 403.1823         | 202.0948        |                |                  |                |                  | A    |   |                 |                |                  | <b>385.1718</b> | 193.0895         | 9  |
| 5  | 534.2228         | 267.6151        |                |                  |                |                  | M    |   |                 |                |                  | 516.2123        | 258.6098         | 8  |
| 6  | 605.2599         | 303.1336        |                |                  |                |                  | A    |   |                 |                |                  | 587.2494        | 294.1283         | 7  |
| 7  | 768.3233         | 384.6653        |                |                  |                |                  | Y    |   |                 |                |                  | 750.3127        | 375.6600         | 6  |
| 8  | 931.3866         | 466.1969        |                |                  |                |                  | Y    |   |                 |                |                  | 913.3760        | 457.1917         | 5  |
| 9  | <b>1044.4707</b> | 522.7390        |                |                  |                |                  | L    |   |                 |                |                  | 1026.4601       | 513.7337         | 4  |
| 10 | 1158.5136        | 579.7604        | 1141.4870      | 571.2472         | 1140.5030      | 570.7551         | N    |   |                 |                |                  | 332.1928        | 166.6001         | 3  |
| 11 | 1229.5507        | 615.2790        | 1212.5242      | 606.7657         | 1211.5401      | 606.2737         | A    |   |                 |                |                  | 218.1499        | 109.5786         | 2  |
| 12 |                  |                 |                |                  |                |                  | K    |   |                 |                |                  | 147.1128        | 74.0600          | 1  |

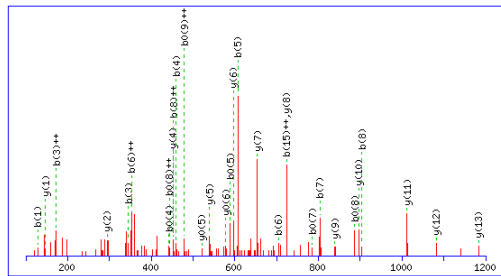

Monoisotopic mass of neutral peptide Mr(calc): 1984.9015  
 Ions Score: 62 Expect: 0.0084  
 Matches (Bold Red): 31/222 fragment ions using 68 most intense peaks

| #  | b               | b <sup>++</sup> | b <sup>*</sup> | b <sup>+++</sup> | b <sup>0</sup>  | b <sup>0++</sup> | Seq. | y                | y <sup>++</sup> | y <sup>*</sup> | y <sup>+++</sup> | y <sup>0</sup>  | y <sup>0++</sup> | #  |
|----|-----------------|-----------------|----------------|------------------|-----------------|------------------|------|------------------|-----------------|----------------|------------------|-----------------|------------------|----|
| 1  | <b>129.1022</b> | 65.0548         |                |                  |                 |                  | K    |                  |                 |                |                  |                 |                  | 20 |
| 2  | 230.1499        | 115.5786        | 213.1234       | 107.0653         | 212.1394        | 106.5733         | T    | 1857.8137        | 929.4105        | 1840.7872      | 920.8972         | 1839.8032       | 920.4052         | 19 |
| 3  | <b>345.1769</b> | <b>173.0921</b> | 328.1503       | 164.5788         | 327.1663        | 164.0868         | D    | 1756.7661        | 878.8867        | 1739.7395      | 870.3734         | 1738.7555       | 869.8814         | 18 |
| 4  | <b>460.2038</b> | 230.6055        | 443.1773       | 222.0923         | <b>442.1932</b> | 221.6003         | D    | 1641.7391        | 821.3732        | 1624.7126      | 812.8599         | 1623.7285       | 812.3679         | 17 |
| 5  | <b>607.2722</b> | 304.1397        | 590.2457       | 295.6265         | <b>589.2617</b> | 295.1345         | F    | 1526.7122        | 763.8597        | 1509.6856      | 755.3464         | 1508.7016       | 754.8544         | 16 |
| 6  | <b>704.3250</b> | <b>352.6661</b> | 687.2984       | 344.1529         | 686.3144        | 343.6608         | P    | 1379.6438        | 690.3255        | 1362.6172      | 681.8122         | 1361.6332       | 681.3202         | 15 |
| 7  | <b>803.3934</b> | 402.2003        | 786.3668       | 393.6871         | <b>785.3828</b> | 393.1951         | V    | 1282.5910        | 641.7991        | 1265.5644      | 633.2859         | 1264.5804       | 632.7938         | 14 |
| 8  | <b>904.4411</b> | <b>452.7242</b> | 887.4145       | 444.2109         | <b>886.4305</b> | <b>443.7189</b>  | T    | <b>1183.5226</b> | 592.2649        | 1166.4960      | 583.7517         | 1165.5120       | 583.2596         | 13 |
| 9  | 975.4782        | 488.2427        | 958.4516       | 479.7295         | 957.4676        | <b>479.2375</b>  | A    | <b>1082.4749</b> | 541.7411        | 1065.4483      | 533.2278         | 1064.4643       | 532.7358         | 12 |
| 10 | 1090.5051       | 545.7562        | 1073.4786      | 537.2429         | 1072.4946       | 536.7509         | D    | <b>1011.4378</b> | 506.2225        | 994.4112       | 497.7093         | 993.4272        | 497.2172         | 11 |
| 11 | 1147.5266       | 574.2669        | 1130.5000      | 565.7537         | 1129.5160       | 565.2617         | G    | <b>896.4108</b>  | 448.7091        | 879.3843       | 440.1958         | 878.4003        | 439.7038         | 10 |
| 12 | 1262.5535       | 631.7804        | 1245.5270      | 623.2671         | 1244.5430       | 622.7751         | D    | <b>839.3894</b>  | 420.1983        | 822.3628       | 411.6851         | 821.3788        | 411.1930         | 9  |
| 13 | 1333.5907       | 667.2990        | 1316.5641      | 658.7857         | 1315.5801       | 658.2937         | A    | <b>724.3624</b>  | 362.6849        | 707.3359       | 354.1716         | 706.3519        | 353.6796         | 8  |
| 14 | 1390.6121       | 695.8097        | 1373.5856      | 687.2964         | 1372.6016       | 686.8044         | G    | <b>653.3253</b>  | 327.1663        | 636.2988       | 318.6530         | 635.3148        | 318.1610         | 7  |
| 15 | 1447.6336       | <b>724.3204</b> | 1430.6070      | 715.8072         | 1429.6230       | 715.3151         | G    | <b>596.3039</b>  | 298.6556        | 579.2773       | 290.1423         | <b>578.2932</b> | 289.6503         | 6  |
| 16 | 1534.6656       | 767.8364        | 1517.6391      | 759.3232         | 1516.6550       | 758.8312         | S    | <b>539.2824</b>  | 270.1448        | 522.2558       | 261.6316         | <b>521.2718</b> | 261.1396         | 5  |
| 17 | 1591.6871       | 796.3472        | 1574.6605      | 787.8339         | 1573.6765       | 787.3419         | G    | <b>452.2504</b>  | 226.6288        | 435.2238       | 218.1155         | 434.2398        | 217.6235         | 4  |
| 18 | 1692.7348       | 846.8710        | 1675.7082      | 838.3577         | 1674.7242       | 837.8657         | T    | 395.2289         | 198.1181        | 378.2023       | 189.6048         | 377.2183        | 189.1128         | 3  |
| 19 | 1839.8032       | 920.4052        | 1822.7766      | 911.8919         | 1821.7926       | 911.3999         | F    | <b>294.1812</b>  | 147.5942        | 277.1547       | 139.0810         |                 |                  | 2  |
| 20 |                 |                 |                |                  |                 |                  | K    | <b>147.1128</b>  | 74.0600         | 130.0863       | 65.5468          |                 |                  | 1  |



# Protein band 6 (-Mn): Elongation Factor Tu

Score: 1327

M<sub>r</sub>: 42926

Variable modifications: Carbamidomethyl (C), Oxidation (M)  
 Cleavage by Trypsin: cuts C-term side of KR unless next residue is P  
 Sequence Coverage: 60%

Matched peptides shown in **Bold Red**

1 MAKEK**FERSK** PHVNVGTIGH VDHGK**TTLTA** **ALTTILAKKF** GGAAKAYDQI  
 51 **DNAPEEKARG** ITINTSHVEY ETETRH<sup>Y</sup>YAHV DCPGHADYVK NMITGAAQMD  
 101 GAILVCSAAD GPMPQ**TREHI** LLARQVGVPY IIVFMNKCDM VDDAELEL<sup>V</sup>  
 151 **EMEIRDLLSS** YDFPGDDCPI VQGSALKALE GDAAYEEKIF ELATALDSYI  
 201 **PTPERAVDKP** FLLPIEDVFS ISGRGTVVTG RVERGIIHVG DEIEIVGLKE  
 251 TQK**TTC**TVGE MFRKLLDEGQ AGDNVGVLLR GTKREDVERG QVLAKPGTIT  
 301 PHTK**FKA**EVY VLSKEEGGRH TPFFANYRPQ FYFR**TTD**VTG AVTLEKGVEM  
 351 VMPGENVTIT VELIAP**IA**ME EGLRFAIREG GRITVGAGVVS SVIA

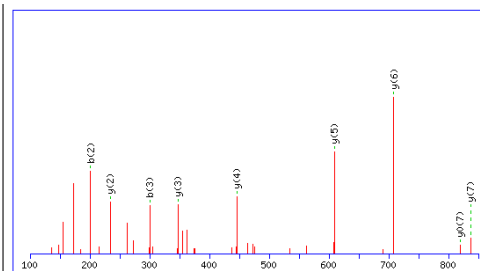

Monoisotopic mass of neutral peptide Mr(calc): 907.5015  
 Ions Score: 52 Expect: 0.11  
 Matches (**Bold Red**): 9/66 fragment ions using 9 most intense peaks

| # | b               | b <sup>++</sup> | b <sup>0</sup> | b <sup>0++</sup> | Seq. | y               | y <sup>++</sup> | y <sup>+</sup> | y <sup>+++</sup> | y <sup>0</sup>  | y <sup>0++</sup> | # |
|---|-----------------|-----------------|----------------|------------------|------|-----------------|-----------------|----------------|------------------|-----------------|------------------|---|
| 1 | 72.0444         | 36.5258         |                |                  | A    |                 |                 |                |                  |                 |                  | 8 |
| 2 | <b>201.0870</b> | 101.0471        | 183.0764       | 92.0418          | E    | <b>837.4716</b> | 419.2395        | 820.4451       | 410.7262         | <b>819.4611</b> | 410.2342         | 7 |
| 3 | <b>300.1554</b> | 150.5813        | 282.1448       | 141.5761         | V    | <b>708.4291</b> | 354.7182        | 691.4025       | 346.2049         | 690.4185        | 345.7129         | 6 |
| 4 | 463.2187        | 232.1130        | 445.2082       | 223.1077         | Y    | <b>609.3606</b> | 305.1840        | 592.3341       | 296.6707         | 591.3501        | 296.1787         | 5 |
| 5 | 562.2871        | 281.6472        | 544.2766       | 272.6419         | V    | <b>446.2973</b> | 223.6523        | 429.2708       | 215.1390         | 428.2867        | 214.6470         | 4 |
| 6 | 675.3712        | 338.1892        | 657.3606       | 329.1840         | L    | <b>347.2289</b> | 174.1181        | 330.2023       | 165.6048         | 329.2183        | 165.1128         | 3 |
| 7 | 762.4032        | 381.7053        | 744.3927       | 372.7000         | S    | <b>234.1448</b> | 117.5761        | 217.1183       | 109.0628         | 216.1343        | 108.5708         | 2 |
| 8 |                 |                 |                |                  | K    | 147.1128        | 74.0600         | 130.0863       | 65.5468          |                 |                  | 1 |

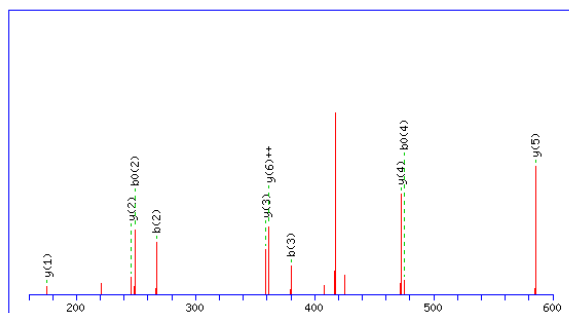

Monoisotopic mass of neutral peptide Mr(calc): 850.5025  
 Ions Score: 40 Expect: 1.6  
 Matches (**Bold Red**): 10/48 fragment ions using 15 most intense peaks

| # | b               | b <sup>++</sup> | b <sup>0</sup>  | b <sup>0++</sup> | Seq. | y               | y <sup>++</sup> | y <sup>+</sup> | y <sup>+++</sup> | # |
|---|-----------------|-----------------|-----------------|------------------|------|-----------------|-----------------|----------------|------------------|---|
| 1 | 130.0499        | 65.5286         | 112.0393        | 56.5233          | E    |                 |                 |                |                  | 7 |
| 2 | <b>267.1088</b> | 134.0580        | <b>249.0982</b> | 125.0527         | H    | 722.4672        | <b>361.7372</b> | 705.4406       | 353.2239         | 6 |
| 3 | <b>380.1928</b> | 190.6001        | 362.1823        | 181.5948         | I    | <b>585.4083</b> | 293.2078        | 568.3817       | 284.6945         | 5 |
| 4 | 493.2769        | 247.1421        | <b>475.2663</b> | 238.1368         | L    | <b>472.3242</b> | 236.6657        | 455.2976       | 228.1525         | 4 |
| 5 | 606.3610        | 303.6841        | 588.3504        | 294.6788         | L    | <b>359.2401</b> | 180.1237        | 342.2136       | 171.6104         | 3 |
| 6 | 677.3981        | 339.2027        | 659.3875        | 330.1974         | A    | <b>246.1561</b> | 123.5817        | 229.1295       | 115.0684         | 2 |
| 7 |                 |                 |                 |                  | R    | <b>175.1190</b> | 88.0631         | 158.0924       | 79.5498          | 1 |

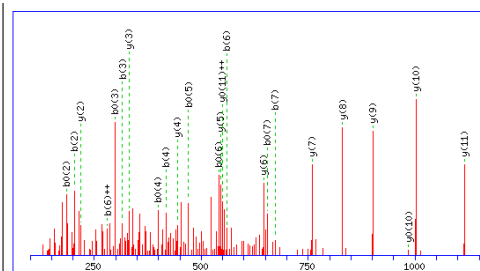

Monoisotopic mass of neutral peptide Mr(calc): 1316.7915  
 Ions Score: 59 Expect: 0.022  
 Matches (**Bold Red**): 24/112 fragment ions using 53 most intense peaks

| #  | b               | b <sup>++</sup> | b <sup>0</sup>  | b <sup>0++</sup> | Seq. | y                | y <sup>++</sup> | y <sup>+</sup> | y <sup>+++</sup> | y <sup>0</sup>  | y <sup>0++</sup> | #  |
|----|-----------------|-----------------|-----------------|------------------|------|------------------|-----------------|----------------|------------------|-----------------|------------------|----|
| 1  | 102.0550        | 51.5311         | 84.0444         | 42.5258          | T    |                  |                 |                |                  |                 |                  | 13 |
| 2  | <b>203.1026</b> | 102.0550        | <b>185.0921</b> | 93.0497          | T    | 1216.7511        | 608.8792        | 1199.7246      | 600.3659         | 1198.7406       | 599.8739         | 12 |
| 3  | <b>316.1867</b> | 158.5970        | <b>298.1761</b> | 149.5917         | L    | <b>1115.7034</b> | 558.3554        | 1098.6769      | 549.8421         | 1097.6929       | <b>549.3501</b>  | 11 |
| 4  | <b>417.2344</b> | 209.1208        | <b>399.2238</b> | 200.1155         | T    | <b>1002.6194</b> | 501.8133        | 985.5928       | 493.3001         | <b>984.6088</b> | 492.8080         | 10 |
| 5  | 488.2715        | 244.6394        | <b>470.2609</b> | 235.6341         | A    | <b>901.5717</b>  | 451.2895        | 884.5451       | 442.7762         | 883.5611        | 442.2842         | 9  |
| 6  | <b>559.3086</b> | <b>280.1579</b> | <b>541.2980</b> | 271.1527         | A    | <b>830.5346</b>  | 415.7709        | 813.5080       | 407.2577         | 812.5240        | 406.7656         | 8  |
| 7  | <b>672.3927</b> | 336.7000        | <b>654.3821</b> | 327.6947         | L    | <b>759.4975</b>  | 380.2524        | 742.4709       | 371.7391         | 741.4869        | 371.2471         | 7  |
| 8  | 773.4403        | 387.2238        | 755.4298        | 378.2185         | T    | <b>646.4134</b>  | 323.7103        | 629.3869       | 315.1971         | 628.4028        | 314.7051         | 6  |
| 9  | 874.4880        | 437.7477        | 856.4775        | 428.7424         | T    | <b>545.3657</b>  | 273.1865        | 528.3392       | 264.6732         | 527.3552        | 264.1812         | 5  |
| 10 | 987.5721        | 494.2897        | 969.5615        | 485.2844         | I    | <b>444.3180</b>  | 222.6627        | 427.2915       | 214.1494         |                 |                  | 4  |
| 11 | 1100.6562       | 550.8317        | 1082.6456       | 541.8264         | L    | <b>331.2340</b>  | 166.1206        | 314.2074       | 157.6074         |                 |                  | 3  |
| 12 | 1171.6933       | 586.3503        | 1153.6827       | 577.3450         | A    | <b>218.1499</b>  | 109.5786        | 201.1234       | 101.0653         |                 |                  | 2  |
| 13 |                 |                 |                 |                  | K    | 147.1128         | 74.0600         | 130.0863       | 65.5468          |                 |                  | 1  |

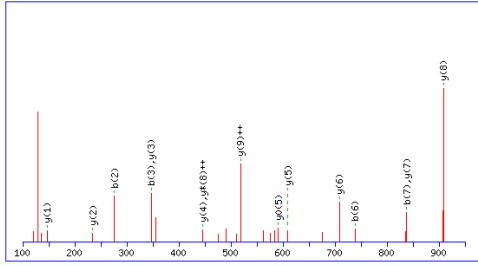

Monoisotopic mass of neutral peptide Mr(calc): 1182.6648  
 Ions Score: 65 Expect: 0.005  
 Matches (Bold Red): 15/98 fragment ions using 19 most intense peaks

| #  | b               | b <sup>++</sup> | b <sup>*</sup> | b <sup>+++</sup> | b <sup>0</sup> | b <sup>0++</sup> | Seq. | y               | y <sup>++</sup> | y <sup>*</sup> | y <sup>+++</sup> | y <sup>0</sup>  | y <sup>0++</sup> | #  |
|----|-----------------|-----------------|----------------|------------------|----------------|------------------|------|-----------------|-----------------|----------------|------------------|-----------------|------------------|----|
| 1  | 148.0757        | 74.5415         |                |                  |                |                  | F    |                 |                 |                |                  |                 |                  | 10 |
| 2  | <b>276.1707</b> | 138.5890        | 259.1441       | 130.0757         |                |                  | K    | 1036.6037       | <b>518.8055</b> | 1019.5772      | 510.2922         | 1018.5932       | 509.8002         | 9  |
| 3  | <b>347.2078</b> | 174.1075        | 330.1812       | 165.5942         |                |                  | A    | <b>908.5088</b> | 454.7580        | 891.4822       | <b>446.2447</b>  | 890.4982        | 445.7527         | 8  |
| 4  | 476.2504        | 238.6288        | 459.2238       | 230.1155         | 458.2398       | 229.6235         | E    | <b>837.4716</b> | 419.2395        | 820.4451       | 410.7262         | 819.4611        | 410.2342         | 7  |
| 5  | 575.3188        | 288.1630        | 558.2922       | 279.6498         | 557.3082       | 279.1577         | V    | <b>708.4291</b> | 354.7182        | 691.4025       | 346.2049         | 690.4185        | 345.7129         | 6  |
| 6  | <b>738.3821</b> | 369.6947        | 721.3556       | 361.1814         | 720.3715       | 360.6894         | Y    | <b>609.3606</b> | 305.1840        | 592.3341       | 296.6707         | <b>591.3501</b> | 296.1787         | 5  |
| 7  | <b>837.4505</b> | 419.2289        | 820.4240       | 410.7156         | 819.4400       | 410.2236         | V    | <b>446.2973</b> | 223.6523        | 429.2708       | 215.1390         | 428.2867        | 214.6470         | 4  |
| 8  | 950.5346        | 475.7709        | 933.5080       | 467.2577         | 932.5240       | 466.7656         | L    | <b>347.2289</b> | 174.1181        | 330.2023       | 165.6048         | 329.2183        | 165.1128         | 3  |
| 9  | 1037.5666       | 519.2869        | 1020.5401      | 510.7737         | 1019.5560      | 510.2817         | S    | <b>234.1448</b> | 117.5761        | 217.1183       | 109.0628         | 216.1343        | 108.5708         | 2  |
| 10 |                 |                 |                |                  |                |                  | K    | <b>147.1128</b> | 74.0600         | 130.0863       | 65.5468          |                 |                  | 1  |

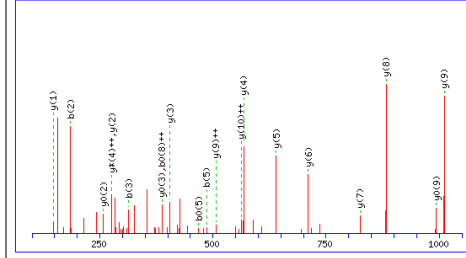

Monoisotopic mass of neutral peptide Mr(calc): 1194.5404  
 Ions Score: 65 Expect: 0.005  
 Matches (Bold Red): 20/94 fragment ions using 36 most intense peaks

| #  | b               | b <sup>++</sup> | b <sup>0</sup>  | b <sup>0++</sup> | Seq. | y                | y <sup>++</sup> | y <sup>*</sup> | y <sup>+++</sup> | y <sup>0</sup>  | y <sup>0++</sup> | #  |
|----|-----------------|-----------------|-----------------|------------------|------|------------------|-----------------|----------------|------------------|-----------------|------------------|----|
| 1  | 72.0444         | 36.5258         |                 |                  | A    |                  |                 |                |                  |                 |                  | 11 |
| 2  | <b>185.1285</b> | 93.0679         |                 |                  | L    | 1124.5106        | <b>562.7589</b> | 1107.4841      | 554.2457         | 1106.5000       | 553.7537         | 10 |
| 3  | <b>314.1710</b> | 157.5892        | 296.1605        | 148.5839         | E    | <b>1011.4265</b> | <b>506.2169</b> | 994.4000       | 497.7036         | <b>993.4160</b> | 497.2116         | 9  |
| 4  | 371.1925        | 186.0999        | 353.1819        | 177.0946         | G    | <b>882.3840</b>  | 441.6956        | 865.3574       | 433.1823         | 864.3734        | 432.6903         | 8  |
| 5  | <b>486.2195</b> | 243.6134        | <b>468.2089</b> | 234.6081         | D    | <b>825.3625</b>  | 413.1849        | 808.3359       | 404.6716         | 807.3519        | 404.1796         | 7  |
| 6  | 557.2566        | 279.1319        | 539.2460        | 270.1266         | A    | <b>710.3355</b>  | 355.6714        | 693.3090       | 347.1581         | 692.3250        | 346.6661         | 6  |
| 7  | 628.2937        | 314.6505        | 610.2831        | 305.6452         | A    | <b>639.2984</b>  | 320.1529        | 622.2719       | 311.6396         | 621.2879        | 311.1476         | 5  |
| 8  | 791.3570        | 396.1821        | 773.3464        | 387.1769         | Y    | <b>568.2613</b>  | 284.6343        | 551.2348       | <b>276.1210</b>  | 550.2508        | 275.6290         | 4  |
| 9  | 920.3996        | 460.7034        | 902.3890        | 451.6982         | E    | <b>405.1980</b>  | 203.1026        | 388.1714       | 194.5894         | <b>387.1874</b> | 194.0974         | 3  |
| 10 | 1049.4422       | 525.2247        | 1031.4316       | 516.2195         | E    | <b>276.1554</b>  | 138.5813        | 259.1288       | 130.0681         | <b>258.1448</b> | 129.5761         | 2  |
| 11 |                 |                 |                 |                  | K    | <b>147.1128</b>  | 74.0600         | 130.0863       | 65.5468          |                 |                  | 1  |

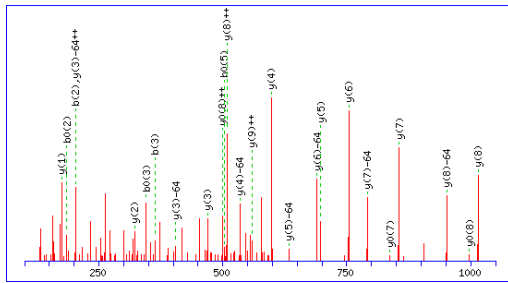

Monoisotopic mass of neutral peptide Mr(calc): 1216.5217  
 Variable modifications:  
 C3 : Carbamidomethyl (C)  
 M8 : Oxidation (M), with neutral losses 0.0000 (shown in table), 63.9983  
 Ions Score: 46 Expect: 0.45  
 Matches (Bold Red): 25/132 fragment ions using 49 most intense peaks

| #  | b               | b <sup>++</sup> | b <sup>0</sup>  | b <sup>0++</sup> | Seq. | y                | y <sup>++</sup> | y <sup>*</sup> | y <sup>+++</sup> | y <sup>0</sup>  | y <sup>0++</sup> | #  |
|----|-----------------|-----------------|-----------------|------------------|------|------------------|-----------------|----------------|------------------|-----------------|------------------|----|
| 1  | 102.0550        | 51.5311         | 84.0444         | 42.5258          | T    |                  |                 |                |                  |                 |                  | 10 |
| 2  | <b>203.1026</b> | 102.0550        | <b>185.0921</b> | 93.0497          | T    | 1116.4813        | <b>558.7443</b> | 1099.4547      | 550.2310         | 1098.4707       | 549.7390         | 9  |
| 3  | <b>363.1333</b> | 182.0703        | <b>345.1227</b> | 173.0650         | C    | <b>1015.4336</b> | <b>508.2204</b> | 998.4070       | 499.7072         | <b>997.4230</b> | <b>499.2151</b>  | 8  |
| 4  | 464.1810        | 232.5941        | 446.1704        | 223.5888         | T    | <b>855.4029</b>  | 428.2051        | 838.3764       | 419.6918         | <b>837.3924</b> | 419.1998         | 7  |
| 5  | 521.2024        | 261.1049        | <b>503.1919</b> | 252.0996         | G    | <b>754.3552</b>  | 377.6813        | 737.3287       | 369.1680         | 736.3447        | 368.6760         | 6  |
| 6  | 620.2708        | 310.6391        | 602.2603        | 301.6338         | V    | <b>697.3338</b>  | 349.1705        | 680.3072       | 340.6573         | 679.3232        | 340.1652         | 5  |
| 7  | 749.3134        | 375.1604        | 731.3029        | 366.1551         | E    | <b>598.2654</b>  | 299.6363        | 581.2388       | 291.1230         | 580.2548        | 290.6310         | 4  |
| 8  | 896.3488        | 448.6781        | 878.3383        | 439.6728         | M    | <b>469.2228</b>  | 235.1150        | 452.1962       | 226.6017         |                 |                  | 3  |
| 9  | 1043.4173       | 522.2123        | 1025.4067       | 513.2070         | F    | <b>322.1874</b>  | 161.5973        | 305.1608       | 153.0840         |                 |                  | 2  |
| 10 |                 |                 |                 |                  | R    | <b>175.1190</b>  | 88.0631         | 158.0924       | 79.5498          |                 |                  | 1  |

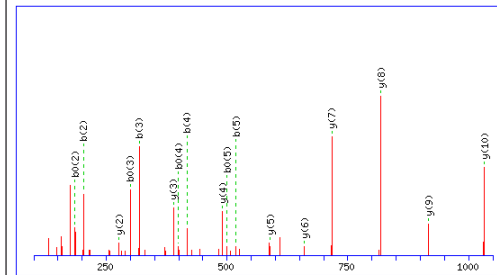

Monoisotopic mass of neutral peptide Mr(calc): 1233.6453  
 Ions Score: 81 Expect: 0.00014  
 Matches (Bold Red): 17/108 fragment ions using 24 most intense peaks

| #  | b               | b <sup>++</sup> | b <sup>0</sup>  | b <sup>0++</sup> | Seq. | y                | y <sup>++</sup> | y <sup>*</sup> | y <sup>+++</sup> | y <sup>0</sup>  | y <sup>0++</sup> | #  |
|----|-----------------|-----------------|-----------------|------------------|------|------------------|-----------------|----------------|------------------|-----------------|------------------|----|
| 1  | 102.0550        | 51.5311         | 84.0444         | 42.5258          | T    |                  |                 |                |                  |                 |                  | 12 |
| 2  | <b>203.1026</b> | 102.0550        | <b>185.0921</b> | 93.0497          | T    | 1133.6048        | 567.3061        | 1116.5783      | 558.7928         | 1115.5943       | 558.3008         | 11 |
| 3  | <b>318.1296</b> | 159.5684        | <b>300.1190</b> | 150.5631         | D    | <b>1032.5572</b> | 516.7822        | 1015.5306      | 508.2689         | 1014.5466       | 507.7769         | 10 |
| 4  | <b>417.1980</b> | 209.1026        | <b>399.1874</b> | 200.0974         | V    | <b>917.5302</b>  | 459.2688        | 900.5037       | 450.7555         | 899.5197        | 450.2635         | 9  |
| 5  | <b>518.2457</b> | 259.6265        | <b>500.2351</b> | 250.6212         | T    | <b>818.4618</b>  | 409.7345        | 801.4353       | 401.2213         | 800.4512        | 400.7293         | 8  |
| 6  | 575.2671        | 288.1372        | 557.2566        | 279.1319         | G    | <b>717.4141</b>  | 359.2107        | 700.3876       | 350.6974         | 699.4036        | 350.2054         | 7  |
| 7  | 646.3042        | 323.6558        | 628.2937        | 314.6505         | A    | <b>660.3927</b>  | 330.7000        | 643.3661       | 322.1867         | 642.3821        | 321.6947         | 6  |
| 8  | 745.3727        | 373.1900        | 727.3621        | 364.1847         | V    | <b>589.3556</b>  | 295.1814        | 572.3290       | 286.6681         | 571.3450        | 286.1761         | 5  |
| 9  | 846.4203        | 423.7138        | 828.4098        | 414.7085         | T    | <b>490.2871</b>  | 245.6472        | 473.2606       | 237.1339         | 472.2766        | 236.6419         | 4  |
| 10 | 959.5044        | 480.2558        | 941.4938        | 471.2506         | L    | <b>389.2395</b>  | 195.1234        | 372.2129       | 186.6101         | 371.2289        | 186.1181         | 3  |
| 11 | 1088.5470       | 544.7771        | 1070.5364       | 535.7719         | E    | <b>276.1554</b>  | 138.5813        | 259.1288       | 130.0681         | <b>258.1448</b> | 129.5761         | 2  |
| 12 |                 |                 |                 |                  | K    | <b>147.1128</b>  | 74.0600         | 130.0863       | 65.5468          |                 |                  | 1  |

# Protein band 6 (-Mn): DnaJ

Score: 127

M<sub>r</sub>: 40590

Variable modifications: Carbamidomethyl (C), Oxidation (M)  
 Cleavage by Trypsin: cuts C-term side of KR unless next residue is P  
 Sequence Coverage: 6%

Matched peptides shown in **Red**

```

1 MSNQDFYAIL GVARTATDDE IKKAYRKLAM KYHPDRNPDN KEAEEKFKEV
51 QKAYETLSDK EKRAMYDQYG HAAFEGGGQG FGFGGGGGFGG AQQFDFGDIF
101 SQMFGGSGR AQPDIYQGEDV QVGIETILEE AAKGVKKRIN IPTYEACDVC
151 NGSAGKPGTS PETCPICKGS GTVHIQQAIF RMQQICPTCH GAGKHIKEPC
201 VKCRGAGRNK AVKTVEVNIP AGIDDGQRIR LSGEGGPGMH GAPAGDLYVT
251 VRIRAHKIFQ RDGLDLHCEL PISFATAALG GELEVPITLDG KVKLITVPKET
301 QTGRMRVKG KGVKSLRSSA TGDLYCHIVV ETPVNLIDRQ KELLEEFERI
351 STGLNQTPR KKSFLDKLRD LFD
  
```

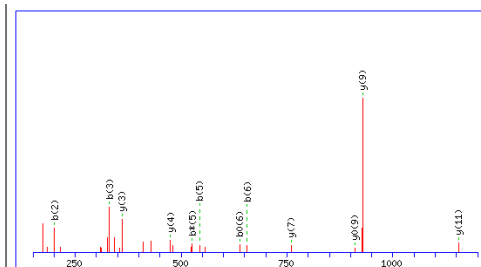

Monoisotopic mass of neutral peptide Mr(calc): 1582.7951  
 Ions Score: 40 Expect: 1.6  
 Matches (**Red**): 12/154 fragment ions using 18 most intense peaks

| #  | b               | b <sup>++</sup> | b <sup>*</sup>  | b <sup>+++</sup> | b <sup>0</sup>  | b <sup>0++</sup> | Seq.     | y                | y <sup>++</sup> | y <sup>*</sup> | y <sup>+++</sup> | y <sup>0</sup>  | y <sup>0++</sup> | #  |
|----|-----------------|-----------------|-----------------|------------------|-----------------|------------------|----------|------------------|-----------------|----------------|------------------|-----------------|------------------|----|
| 1  | 102.0550        | 51.5311         |                 |                  | 84.0444         | 42.5258          | <b>T</b> |                  |                 |                |                  |                 |                  | 15 |
| 2  | <b>201.1234</b> | 101.0653        |                 |                  | 183.1128        | 92.0600          | <b>V</b> | 1482.7547        | 741.8810        | 1465.7281      | 733.3677         | 1464.7441       | 732.8757         | 14 |
| 3  | <b>330.1660</b> | 165.5866        |                 |                  | 312.1554        | 156.5813         | <b>E</b> | 1383.6863        | 692.3468        | 1366.6597      | 683.8335         | 1365.6757       | 683.3415         | 13 |
| 4  | 429.2344        | 215.1208        |                 |                  | 411.2238        | 206.1155         | <b>V</b> | 1254.6437        | 627.8255        | 1237.6171      | 619.3122         | 1236.6331       | 618.8202         | 12 |
| 5  | <b>543.2773</b> | 272.1423        | <b>526.2508</b> | 263.6290         | 525.2667        | 263.1370         | <b>N</b> | <b>1155.5753</b> | 578.2913        | 1138.5487      | 569.7780         | 1137.5647       | 569.2860         | 11 |
| 6  | <b>656.3614</b> | 328.6843        | 639.3348        | 320.1710         | <b>638.3508</b> | 319.6790         | <b>I</b> | 1041.5324        | 521.2698        | 1024.5058      | 512.7565         | 1023.5218       | 512.2645         | 10 |
| 7  | 753.4141        | 377.2107        | 736.3876        | 368.6974         | 735.4036        | 368.2054         | <b>P</b> | <b>928.4483</b>  | 464.7278        | 911.4217       | 456.2145         | <b>910.4377</b> | 455.7225         | 9  |
| 8  | 824.4512        | 412.7293        | 807.4247        | 404.2160         | 806.4407        | 403.7240         | <b>A</b> | 831.3955         | 416.2014        | 814.3690       | 407.6881         | 813.3850        | 407.1961         | 8  |
| 9  | 881.4727        | 441.2400        | 864.4462        | 432.7267         | 863.4621        | 432.2347         | <b>G</b> | <b>760.3584</b>  | 380.6828        | 743.3319       | 372.1696         | 742.3478        | 371.6776         | 7  |
| 10 | 994.5568        | 497.7820        | 977.5302        | 489.2688         | 976.5462        | 488.7767         | <b>I</b> | 703.3369         | 352.1721        | 686.3104       | 343.6588         | 685.3264        | 343.1668         | 6  |
| 11 | 1109.5837       | 555.2955        | 1092.5572       | 546.7822         | 1091.5732       | 546.2902         | <b>D</b> | 590.2529         | 295.6301        | 573.2263       | 287.1168         | 572.2423        | 286.6248         | 5  |
| 12 | 1224.6107       | 612.8090        | 1207.5841       | 604.2957         | 1206.6001       | 603.8037         | <b>D</b> | <b>475.2259</b>  | 238.1166        | 458.1994       | 229.6033         | 457.2154        | 229.1113         | 4  |
| 13 | 1281.6321       | 641.3197        | 1264.6056       | 632.8064         | 1263.6216       | 632.3144         | <b>G</b> | <b>360.1990</b>  | 180.6031        | 343.1724       | 172.0899         |                 |                  | 3  |
| 14 | 1409.6907       | 705.3490        | 1392.6642       | 696.8357         | 1391.6801       | 696.3437         | <b>Q</b> | 303.1775         | 152.0924        | 286.1510       | 143.5791         |                 |                  | 2  |
| 15 |                 |                 |                 |                  |                 |                  | <b>R</b> | 175.1190         | 88.0631         | 158.0924       | 79.5498          |                 |                  | 1  |

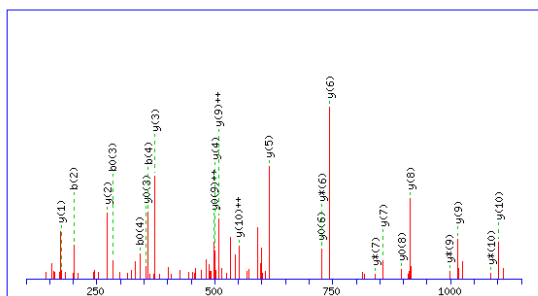

Monoisotopic mass of neutral peptide Mr(calc): 1214.6255  
 Ions Score: 87 Expect: 3.4e-05  
 Matches (**Red**): 24/102 fragment ions using 42 most intense peaks

| #  | b               | b <sup>++</sup> | b <sup>*</sup> | b <sup>+++</sup> | b <sup>0</sup>  | b <sup>0++</sup> | Seq.     | y                | y <sup>++</sup> | y <sup>*</sup>   | y <sup>+++</sup> | y <sup>0</sup>  | y <sup>0++</sup> | #  |
|----|-----------------|-----------------|----------------|------------------|-----------------|------------------|----------|------------------|-----------------|------------------|------------------|-----------------|------------------|----|
| 1  | 114.0913        | 57.5493         |                |                  |                 |                  | <b>I</b> |                  |                 |                  |                  |                 |                  | 11 |
| 2  | <b>201.1234</b> | 101.0653        |                |                  | 183.1128        | 92.0600          | <b>S</b> | <b>1102.5487</b> | <b>551.7780</b> | <b>1085.5222</b> | 543.2647         | 1084.5382       | 542.7727         | 10 |
| 3  | 302.1710        | 151.5892        |                |                  | <b>284.1605</b> | 142.5839         | <b>T</b> | <b>1015.5167</b> | <b>508.2620</b> | <b>998.4902</b>  | 499.7487         | 997.5061        | <b>499.2567</b>  | 9  |
| 4  | <b>359.1925</b> | 180.0999        |                |                  | <b>341.1819</b> | 171.0946         | <b>G</b> | <b>914.4690</b>  | 457.7381        | 897.4425         | 449.2249         | <b>896.4585</b> | 448.7329         | 8  |
| 5  | 472.2766        | 236.6419        |                |                  | 454.2660        | 227.6366         | <b>L</b> | <b>857.4476</b>  | 429.2274        | <b>840.4210</b>  | 420.7141         | 839.4370        | 420.2221         | 7  |
| 6  | 601.3192        | 301.1632        |                |                  | 583.3086        | 292.1579         | <b>E</b> | <b>744.3635</b>  | 372.6854        | <b>727.3369</b>  | 364.1721         | <b>726.3529</b> | 363.6801         | 6  |
| 7  | 715.3621        | 358.1847        | 698.3355       | 349.6714         | 697.3515        | 349.1794         | <b>N</b> | <b>615.3209</b>  | 308.1641        | 598.2944         | 299.6508         | 597.3103        | 299.1588         | 5  |
| 8  | 843.4207        | 422.2140        | 826.3941       | 413.7007         | 825.4101        | 413.2087         | <b>Q</b> | <b>501.2780</b>  | 251.1426        | 484.2514         | 242.6293         | 483.2674        | 242.1373         | 4  |
| 9  | 944.4684        | 472.7378        | 927.4418       | 464.2245         | 926.4578        | 463.7325         | <b>T</b> | <b>373.2194</b>  | 187.1133        | 356.1928         | 178.6001         | <b>355.2088</b> | 178.1081         | 3  |
| 10 | 1041.5211       | 521.2642        | 1024.4946      | 512.7509         | 1023.5106       | 512.2589         | <b>P</b> | <b>272.1717</b>  | 136.5895        | 255.1452         | 128.0762         |                 |                  | 2  |
| 11 |                 |                 |                |                  |                 |                  | <b>R</b> | <b>175.1190</b>  | 88.0631         | 158.0924         | 79.5498          |                 |                  | 1  |

# Protein band 15 (+Mn): 50S ribosomal protein L3

Score: 164

M<sub>r</sub>: 22663

Variable modifications: Carbamidomethyl (C), Oxidation (M)  
 Cleavage by Trypsin: cuts C-term side of KR unless next residue is P  
 Sequence Coverage: 15%

Matched peptides shown in **Bold Red**

1 MITLGLVGRKV GMTRVFDEQG VSPVPTVLDL SANRVTQVK S KDTIDGYTAVQ  
 51 VIFGQKKANR VNKAEGHFA KAGVEAGRGL **IEFALTEEKL AELKAGDEIT**  
 101 **VSMFEVQQLV DVTGTSGKGG** FSGTIKRHNF GAQRTSHGNS RSHRVPGSIG  
 151 MAQDPGRVFP GKRMAGQYGN TKATVQKLEV VRVDAERQLL LVKGAVPGAV  
 201 NSDVVVVRPSV KVGA

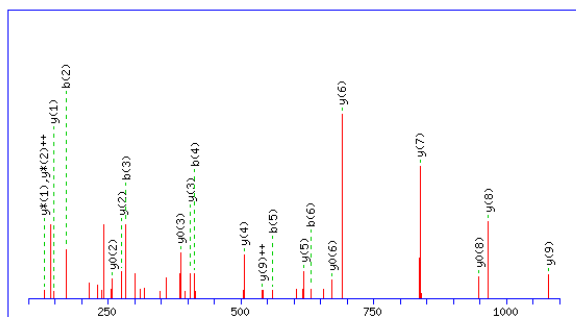

Monoisotopic mass of neutral peptide Mr(calc): 1248.6601  
 Ions Score: 64 Expect: 0.0067  
 Matches (**Bold Red**): 21/92 fragment ions using 37 most intense peaks

| #  | b               | b <sup>++</sup> | b <sup>0</sup> | b <sup>0++</sup> | Seq.     | y                | y <sup>++</sup> | y <sup>*</sup>  | y <sup>***</sup> | y <sup>0</sup>  | y <sup>0++</sup> | #  |
|----|-----------------|-----------------|----------------|------------------|----------|------------------|-----------------|-----------------|------------------|-----------------|------------------|----|
| 1  | 58.0287         | 29.5180         |                |                  | <b>G</b> |                  |                 |                 |                  |                 |                  | 11 |
| 2  | <b>171.1128</b> | 86.0600         |                |                  | <b>L</b> | 1192.6460        | 596.8266        | 1175.6194       | 588.3134         | 1174.6354       | 587.8213         | 10 |
| 3  | <b>284.1969</b> | 142.6021        |                |                  | <b>I</b> | <b>1079.5619</b> | <b>540.2846</b> | 1062.5354       | 531.7713         | 1061.5514       | 531.2793         | 9  |
| 4  | <b>413.2395</b> | 207.1234        | 395.2289       | 198.1181         | <b>E</b> | <b>966.4779</b>  | 483.7426        | 949.4513        | 475.2293         | <b>948.4673</b> | 474.7373         | 8  |
| 5  | <b>560.3079</b> | 280.6576        | 542.2973       | 271.6523         | <b>F</b> | <b>837.4353</b>  | 419.2213        | 820.4087        | 410.7080         | 819.4247        | 410.2160         | 7  |
| 6  | <b>631.3450</b> | 316.1761        | 613.3344       | 307.1709         | <b>A</b> | <b>690.3668</b>  | 345.6871        | 673.3403        | 337.1738         | <b>672.3563</b> | 336.6818         | 6  |
| 7  | 744.4291        | 372.7182        | 726.4185       | 363.7129         | <b>L</b> | <b>619.3297</b>  | 310.1685        | 602.3032        | 301.6552         | 601.3192        | 301.1632         | 5  |
| 8  | 845.4767        | 423.2420        | 827.4662       | 414.2367         | <b>T</b> | <b>506.2457</b>  | 253.6265        | 489.2191        | 245.1132         | 488.2351        | 244.6212         | 4  |
| 9  | 974.5193        | 487.7633        | 956.5088       | 478.7580         | <b>E</b> | <b>405.1980</b>  | 203.1026        | 388.1714        | 194.5894         | <b>387.1874</b> | 194.0974         | 3  |
| 10 | 1103.5619       | 552.2846        | 1085.5514      | 543.2793         | <b>E</b> | <b>276.1554</b>  | 138.5813        | 259.1288        | <b>130.0681</b>  | <b>258.1448</b> | 129.5761         | 2  |
| 11 |                 |                 |                |                  | <b>K</b> | <b>147.1128</b>  | 74.0600         | <b>130.0863</b> | 65.5468          |                 |                  | 1  |

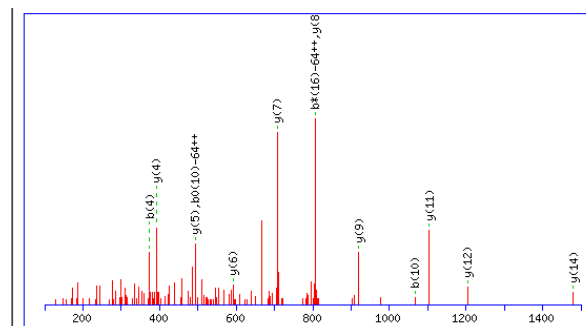

Monoisotopic mass of neutral peptide Mr(calc): 2398.1574  
 Variable modifications:  
 M9 : Oxidation (M), with neutral losses 0.0000 (shown in table), 63.9983  
 Ions Score: 69 Expect: 0.0014  
 Matches (**Bold Red**): 13/354 fragment ions using 17 most intense peaks

| #  | b                | b <sup>++</sup> | b <sup>*</sup> | b <sup>***</sup> | b <sup>0</sup> | b <sup>0++</sup> | Seq.     | y                | y <sup>++</sup> | y <sup>*</sup> | y <sup>***</sup> | y <sup>0</sup> | y <sup>0++</sup> | #  |
|----|------------------|-----------------|----------------|------------------|----------------|------------------|----------|------------------|-----------------|----------------|------------------|----------------|------------------|----|
| 1  | 72.0444          | 36.5258         |                |                  |                |                  | <b>A</b> |                  |                 |                |                  |                |                  | 23 |
| 2  | 129.0659         | 65.0366         |                |                  |                |                  | <b>G</b> | 2328.1275        | 1164.5674       | 2311.1010      | 1156.0541        | 2310.1170      | 1155.5621        | 22 |
| 3  | 244.0928         | 122.5500        |                |                  | 226.0822       | 113.5448         | <b>D</b> | 2271.1061        | 1136.0567       | 2254.0795      | 1127.5434        | 2253.0955      | 1127.0514        | 21 |
| 4  | <b>373.1354</b>  | 187.0713        |                |                  | 355.1248       | 178.0661         | <b>E</b> | 2156.0791        | 1078.5432       | 2139.0526      | 1070.0299        | 2138.0686      | 1069.5379        | 20 |
| 5  | 486.2195         | 243.6134        |                |                  | 468.2089       | 234.6081         | <b>I</b> | 2027.0365        | 1014.0219       | 2010.0100      | 1005.5086        | 2009.0260      | 1005.0166        | 19 |
| 6  | 587.2671         | 294.1372        |                |                  | 569.2566       | 285.1319         | <b>T</b> | 1913.9525        | 957.4799        | 1896.9259      | 948.9666         | 1895.9419      | 948.4746         | 18 |
| 7  | 686.3355         | 343.6714        |                |                  | 668.3250       | 334.6661         | <b>V</b> | 1812.9048        | 906.9560        | 1795.8782      | 898.4428         | 1794.8942      | 897.9508         | 17 |
| 8  | 773.3676         | 387.1874        |                |                  | 755.3570       | 378.1821         | <b>S</b> | 1713.8364        | 857.4218        | 1696.8098      | 848.9086         | 1695.8258      | 848.4165         | 16 |
| 9  | 920.4030         | 460.7051        |                |                  | 902.3924       | 451.6998         | <b>M</b> | 1626.8044        | 813.9058        | 1609.7778      | 805.3925         | 1608.7938      | 804.9005         | 15 |
| 10 | <b>1067.4714</b> | 534.2393        |                |                  | 1049.4608      | 525.2341         | <b>F</b> | <b>1479.7690</b> | 740.3881        | 1462.7424      | 731.8748         | 1461.7584      | 731.3828         | 14 |
| 11 | 1196.5140        | 598.7606        |                |                  | 1178.5034      | 589.7553         | <b>E</b> | 1332.7005        | 666.8539        | 1315.6740      | 658.3406         | 1314.6900      | 657.8486         | 13 |
| 12 | 1295.5824        | 648.2948        |                |                  | 1277.5718      | 639.2896         | <b>V</b> | <b>1203.6579</b> | 602.3326        | 1186.6314      | 593.8193         | 1185.6474      | 593.3273         | 12 |
| 13 | 1352.6039        | 676.8056        |                |                  | 1334.5933      | 667.8003         | <b>G</b> | <b>1104.5895</b> | 552.7984        | 1087.5630      | 544.2851         | 1086.5790      | 543.7931         | 11 |
| 14 | 1480.6624        | 740.8349        | 1463.6359      | 732.3216         | 1462.6519      | 731.8296         | <b>Q</b> | 1047.5681        | 524.2877        | 1030.5415      | 515.7744         | 1029.5575      | 515.2824         | 10 |
| 15 | 1593.7465        | 797.3769        | 1576.7200      | 788.8636         | 1575.7359      | 788.3716         | <b>L</b> | <b>919.5095</b>  | 460.2584        | 902.4829       | 451.7451         | 901.4989       | 451.2531         | 9  |
| 16 | 1692.8149        | 846.9111        | 1675.7884      | 838.3978         | 1674.8044      | 837.9058         | <b>V</b> | <b>806.4254</b>  | 403.7164        | 789.3989       | 395.2031         | 788.4149       | 394.7111         | 8  |
| 17 | 1807.8419        | 904.4246        | 1790.8153      | 895.9113         | 1789.8313      | 895.4193         | <b>D</b> | <b>707.3570</b>  | 354.1821        | 690.3305       | 345.6689         | 689.3464       | 345.1769         | 7  |
| 18 | 1906.9103        | 953.9588        | 1889.8837      | 945.4455         | 1888.8997      | 944.9535         | <b>V</b> | <b>592.3301</b>  | 296.6687        | 575.3035       | 288.1554         | 574.3195       | 287.6634         | 6  |
| 19 | 2007.9580        | 1004.4826       | 1990.9314      | 995.9693         | 1989.9474      | 995.4773         | <b>T</b> | <b>493.2617</b>  | 247.1345        | 476.2351       | 238.6212         | 475.2511       | 238.1292         | 5  |
| 20 | 2064.9794        | 1032.9933       | 2047.9529      | 1024.4801        | 2046.9689      | 1023.9881        | <b>G</b> | <b>392.2140</b>  | 196.6106        | 375.1874       | 188.0974         | 374.2034       | 187.6053         | 4  |
| 21 | 2166.0271        | 1083.5172       | 2149.0005      | 1075.0039        | 2148.0165      | 1074.5119        | <b>T</b> | 335.1925         | 168.0999        | 318.1660       | 159.5866         | 317.1819       | 159.0946         | 3  |
| 22 | 2253.0591        | 1127.0332       | 2236.0326      | 1118.5199        | 2235.0486      | 1118.0279        | <b>S</b> | 234.1448         | 117.5761        | 217.1183       | 109.0628         | 216.1343       | 108.5708         | 2  |
| 23 |                  |                 |                |                  |                |                  | <b>K</b> | 147.1128         | 74.0600         | 130.0863       | 65.5468          |                |                  | 1  |

# Protein band 15 (+Mn): 50S ribosomal protein S5

Score: 106

M<sub>r</sub>: 18231

Variable modifications: Carbamidomethyl (C), Oxidation (M)  
 Cleavage by Trypsin: cuts C-term side of KR unless next residue is P  
 Sequence Coverage: 11%

Matched peptides shown in **Bold Red**

1 MAKHEIEERG DGLIEKMOVAV NRVTIKVVKGG RIMAFSALTV VGDGDGRIGM  
 51 GKGKSKEVPV AVQKAMDQAR RSMIKVPLKN GTIHHEVIGR HGATK**VFMQP**  
 101 **AKEGSGVKAG** GPMRLVFDAM GIHNISAKVH GSTNPNYIVR ATLDGLSKLH  
 151 TPADIAAKRG **LTVEDILGVN** HG

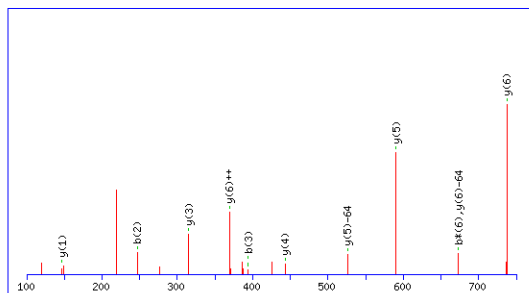

Monoisotopic mass of neutral peptide Mr(calcd): 835.4262  
 Variable modifications:  
 M3 : Oxidation (M), with neutral losses 0.0000 (shown in table), 63.9985  
 Ions Score: 31 Expect: 19  
 Matches (**Bold Red**): 11/64 fragment ions using 21 most intense peaks

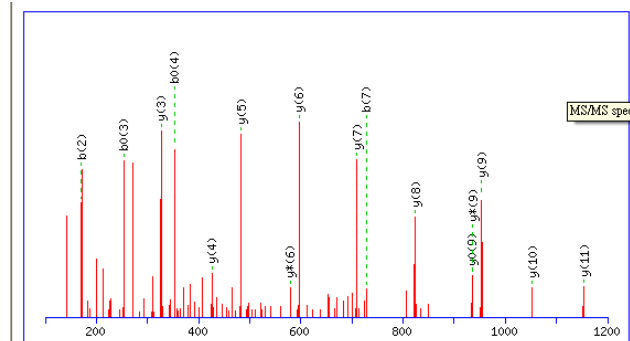

Monoisotopic mass of neutral peptide Mr(calcd): 1322.6830  
 Ions Score: 76 Expect: 0.00042  
 Matches (**Bold Red**): 16/102 fragment ions using 22 most intense peaks

| # | b               | b <sup>++</sup> | b <sup>*</sup>  | b <sup>***</sup> | Seq. | y               | y <sup>++</sup> | y <sup>*</sup> | y <sup>***</sup> | # |
|---|-----------------|-----------------|-----------------|------------------|------|-----------------|-----------------|----------------|------------------|---|
| 1 | 100.0757        | 50.5415         |                 |                  | V    |                 |                 |                |                  | 7 |
| 2 | <b>247.1441</b> | 124.0757        |                 |                  | F    | <b>737.3651</b> | <b>369.1862</b> | 720.3385       | 360.6729         | 6 |
| 3 | <b>394.1795</b> | 197.5934        |                 |                  | M    | <b>590.2967</b> | 295.6520        | 573.2701       | 287.1387         | 5 |
| 4 | 522.2381        | 261.6227        | 505.2115        | 253.1094         | Q    | <b>443.2613</b> | 222.1343        | 426.2347       | 213.6210         | 4 |
| 5 | 619.2909        | 310.1491        | 602.2643        | 301.6358         | P    | <b>315.2027</b> | 158.1050        | 298.1761       | 149.5917         | 3 |
| 6 | 690.3280        | 345.6676        | <b>673.3014</b> | 337.1543         | A    | 218.1499        | 109.5786        | 201.1234       | 101.0653         | 2 |
| 7 |                 |                 |                 |                  | K    | <b>147.1128</b> | 74.0600         | 130.0863       | 65.5468          | 1 |

| #  | b               | b <sup>++</sup> | b <sup>*</sup> | b <sup>***</sup> | b <sup>0</sup>  | b <sup>0++</sup> | Seq. | y                | y <sup>++</sup> | y <sup>*</sup>  | y <sup>***</sup> | y <sup>0</sup>  | y <sup>0++</sup> | #  |
|----|-----------------|-----------------|----------------|------------------|-----------------|------------------|------|------------------|-----------------|-----------------|------------------|-----------------|------------------|----|
| 1  | 58.0287         | 29.5180         |                |                  |                 |                  | G    |                  |                 |                 |                  |                 |                  | 13 |
| 2  | <b>171.1128</b> | 86.0600         |                |                  |                 |                  | L    | 1266.6688        | 633.8381        | 1249.6423       | 625.3248         | 1248.6583       | 624.8328         | 12 |
| 3  | 272.1605        | 136.5839        |                |                  | <b>254.1499</b> | 127.5786         | T    | <b>1153.5848</b> | 577.2960        | 1136.5582       | 568.7828         | 1135.5742       | 568.2907         | 11 |
| 4  | 371.2289        | 186.1181        |                |                  | <b>353.2183</b> | 177.1128         | V    | <b>1052.5371</b> | 526.7722        | 1035.5106       | 518.2589         | 1034.5265       | 517.7669         | 10 |
| 5  | 500.2715        | 250.6394        |                |                  | 482.2609        | 241.6341         | E    | <b>953.4687</b>  | 477.2380        | <b>936.4421</b> | 468.7247         | <b>935.4581</b> | 468.2327         | 9  |
| 6  | 615.2984        | 308.1529        |                |                  | 597.2879        | 299.1476         | D    | <b>824.4261</b>  | 412.7167        | 807.3995        | 404.2034         | 806.4155        | 403.7114         | 8  |
| 7  | <b>728.3825</b> | 364.6949        |                |                  | 710.3719        | 355.6896         | I    | <b>709.3992</b>  | 355.2032        | 692.3726        | 346.6899         |                 |                  | 7  |
| 8  | 841.4666        | 421.2369        |                |                  | 823.4560        | 412.2316         | L    | <b>596.3151</b>  | 298.6612        | <b>579.2885</b> | 290.1479         |                 |                  | 6  |
| 9  | 898.4880        | 449.7477        |                |                  | 880.4775        | 440.7424         | G    | <b>483.2310</b>  | 242.1191        | 466.2045        | 233.6059         |                 |                  | 5  |
| 10 | 997.5564        | 499.2819        |                |                  | 979.5459        | 490.2766         | V    | <b>426.2096</b>  | 213.6084        | 409.1830        | 205.0951         |                 |                  | 4  |
| 11 | 1111.5994       | 556.3033        | 1094.5728      | 547.7900         | 1093.5888       | 547.2980         | N    | <b>327.1411</b>  | 164.0742        | 310.1146        | 155.5609         |                 |                  | 3  |
| 12 | 1248.6583       | 624.8328        | 1231.6317      | 616.3195         | 1230.6477       | 615.8275         | H    | 213.0982         | 107.0527        |                 |                  |                 |                  | 2  |
| 13 |                 |                 |                |                  |                 |                  | G    | 76.0393          | 38.5233         |                 |                  |                 |                  | 1  |



## Protein band 15 (+Mn): H.8 OMP (azurin-like protein, Laz)

Score: 65

$M_r$ : 18516

Variable modifications: Carbamidomethyl (C), Oxidation (M)  
 Cleavage by Trypsin: cuts C-term side of KR unless next residue is P  
 Sequence Coverage: 8%

Matched peptides shown in **Bold Red**

1 MKAYLALISA AVIGLAACSQ EPAAPAAEAT PAAEAPASEA PAAEAPADA  
 51 AEAPAAGNCA ATVESNDNMQ FNIKDIQVSK ACKEFTIILK HTGTQPKASM  
 101 GHNLVIAKAE DMDGVFKDGV GAADIDYVKP DDARVVAHTK **LIGGGEESL**  
 151 **TL**DPAKLADG DYKFACTFPG HGALMNGKVT LVD

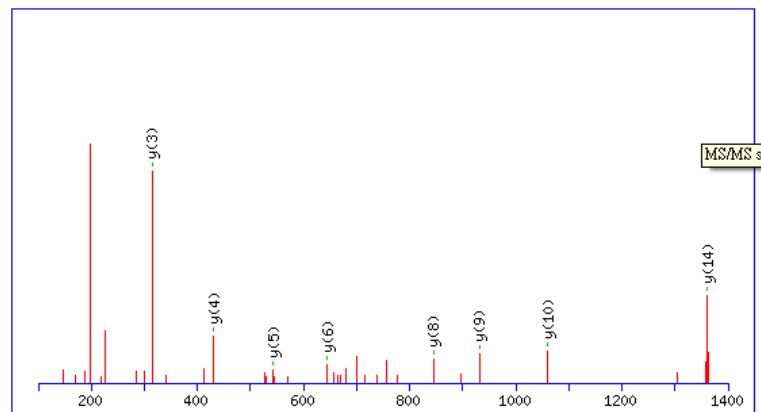

Monoisotopic mass of neutral peptide  $M_r(\text{calc})$ : 1585.8199  
 Ions Score: 65 Expect: 0.0056  
 Matches (**Bold Red**): 8/134 fragment ions using 12 most intense peaks

| #  | b         | b <sup>++</sup> | b <sup>0</sup> | b <sup>0++</sup> | Seq. | y                | y <sup>++</sup> | y <sup>*</sup> | y <sup>+++</sup> | y <sup>0</sup> | y <sup>0++</sup> | #  |
|----|-----------|-----------------|----------------|------------------|------|------------------|-----------------|----------------|------------------|----------------|------------------|----|
| 1  | 114.0913  | 57.5493         |                |                  | L    |                  |                 |                |                  |                |                  | 16 |
| 2  | 227.1754  | 114.0913        |                |                  | I    | 1473.7431        | 737.3752        | 1456.7166      | 728.8619         | 1455.7326      | 728.3699         | 15 |
| 3  | 284.1969  | 142.6021        |                |                  | G    | <b>1360.6591</b> | 680.8332        | 1343.6325      | 672.3199         | 1342.6485      | 671.8279         | 14 |
| 4  | 341.2183  | 171.1128        |                |                  | G    | 1303.6376        | 652.3224        | 1286.6111      | 643.8092         | 1285.6270      | 643.3172         | 13 |
| 5  | 398.2398  | 199.6235        |                |                  | G    | 1246.6161        | 623.8117        | 1229.5896      | 615.2984         | 1228.6056      | 614.8064         | 12 |
| 6  | 527.2824  | 264.1448        | 509.2718       | 255.1395         | E    | 1189.5947        | 595.3010        | 1172.5681      | 586.7877         | 1171.5841      | 586.2957         | 11 |
| 7  | 656.3250  | 328.6661        | 638.3144       | 319.6608         | E    | <b>1060.5521</b> | 530.7797        | 1043.5255      | 522.2664         | 1042.5415      | 521.7744         | 10 |
| 8  | 743.3570  | 372.1821        | 725.3464       | 363.1769         | S    | <b>931.5095</b>  | 466.2584        | 914.4829       | 457.7451         | 913.4989       | 457.2531         | 9  |
| 9  | 830.3890  | 415.6982        | 812.3785       | 406.6929         | S    | <b>844.4775</b>  | 422.7424        | 827.4509       | 414.2291         | 826.4669       | 413.7371         | 8  |
| 10 | 943.4731  | 472.2402        | 925.4625       | 463.2349         | L    | 757.4454         | 379.2264        | 740.4189       | 370.7131         | 739.4349       | 370.2211         | 7  |
| 11 | 1044.5208 | 522.7640        | 1026.5102      | 513.7587         | T    | <b>644.3614</b>  | 322.6843        | 627.3348       | 314.1710         | 626.3508       | 313.6790         | 6  |
| 12 | 1157.6048 | 579.3061        | 1139.5943      | 570.3008         | L    | <b>543.3137</b>  | 272.1605        | 526.2871       | 263.6472         | 525.3031       | 263.1552         | 5  |
| 13 | 1272.6318 | 636.8195        | 1254.6212      | 627.8142         | D    | <b>430.2296</b>  | 215.6185        | 413.2031       | 207.1052         | 412.2191       | 206.6132         | 4  |
| 14 | 1369.6846 | 685.3459        | 1351.6740      | 676.3406         | P    | <b>315.2027</b>  | 158.1050        | 298.1761       | 149.5917         |                |                  | 3  |
| 15 | 1440.7217 | 720.8645        | 1422.7111      | 711.8592         | A    | 218.1499         | 109.5786        | 201.1234       | 101.0653         |                |                  | 2  |
| 16 |           |                 |                |                  | K    | 147.1128         | 74.0600         | 130.0863       | 65.5468          |                |                  | 1  |

## Protein band 15 (+Mn): 50S ribosomal protein L4

Score: 64

$M_r$ : 23288

Variable modifications: Carbamidomethyl (C), Oxidation (M)  
 Cleavage by Trypsin: cuts C-term side of KR unless next residue is P  
 Sequence Coverage: 6%

Matched peptides shown in **Bold Red**

1 MELKVIDAKG QVSGSLVSVD ALFAREYNEA LVHQLVNAYL ANARSGNRAQ  
 51 KTRAEVKHST KKPWRQKGTG RARSGMTSSP LWRKGGRAFP NKPDENFTQK  
 101 VNRKMYRAGM ATILSQLARD ER**LFVIEALT** **AETPKTKVFA** EQVKNLALEQ  
 151 VLFVTKRLDE NVYLASRNLP NVLVLEAQQV DPYSLRLRYKK VIITKDAVAQ  
 201 LEEQWV

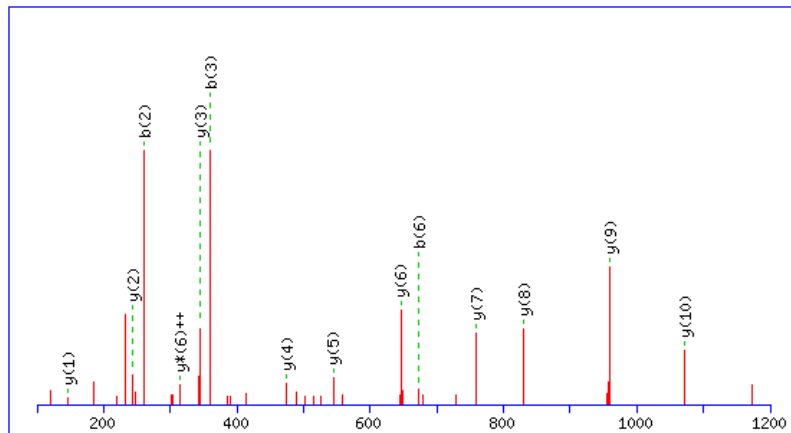

Monoisotopic mass of neutral peptide  $M_r(\text{calc})$ : 1430.8021  
 Ions Score: 64 Expect: 0.0062  
 Matches (**Bold Red**): 14/108 fragment ions using 34 most intense peaks

| #  | b               | b <sup>++</sup> | b <sup>0</sup> | b <sup>0++</sup> | Seq. | y                | y <sup>++</sup> | y <sup>*</sup> | y <sup>+++</sup> | y <sup>0</sup> | y <sup>0++</sup> | #  |
|----|-----------------|-----------------|----------------|------------------|------|------------------|-----------------|----------------|------------------|----------------|------------------|----|
| 1  | 114.0913        | 57.5493         |                |                  | L    |                  |                 |                |                  |                |                  | 13 |
| 2  | <b>261.1598</b> | 131.0835        |                |                  | F    | 1318.7253        | 659.8663        | 1301.6987      | 651.3530         | 1300.7147      | 650.8610         | 12 |
| 3  | <b>360.2282</b> | 180.6177        |                |                  | V    | 1171.6569        | 586.3321        | 1154.6303      | 577.8188         | 1153.6463      | 577.3268         | 11 |
| 4  | 473.3122        | 237.1598        |                |                  | I    | <b>1072.5885</b> | 536.7979        | 1055.5619      | 528.2846         | 1054.5779      | 527.7926         | 10 |
| 5  | 602.3548        | 301.6811        | 584.3443       | 292.6758         | E    | <b>959.5044</b>  | 480.2558        | 942.4779       | 471.7426         | 941.4938       | 471.2506         | 9  |
| 6  | <b>673.3919</b> | 337.1996        | 655.3814       | 328.1943         | A    | <b>830.4618</b>  | 415.7345        | 813.4353       | 407.2213         | 812.4512       | 406.7293         | 8  |
| 7  | 786.4760        | 393.7416        | 768.4654       | 384.7364         | L    | <b>759.4247</b>  | 380.2160        | 742.3981       | 371.7027         | 741.4141       | 371.2107         | 7  |
| 8  | 887.5237        | 444.2655        | 869.5131       | 435.2602         | T    | <b>646.3406</b>  | 323.6740        | 629.3141       | <b>315.1607</b>  | 628.3301       | 314.6687         | 6  |
| 9  | 958.5608        | 479.7840        | 940.5502       | 470.7788         | A    | <b>545.2930</b>  | 273.1501        | 528.2664       | 264.6368         | 527.2824       | 264.1448         | 5  |
| 10 | 1087.6034       | 544.3053        | 1069.5928      | 535.3001         | E    | <b>474.2558</b>  | 237.6316        | 457.2293       | 229.1183         | 456.2453       | 228.6263         | 4  |
| 11 | 1188.6511       | 594.8292        | 1170.6405      | 585.8239         | T    | <b>345.2132</b>  | 173.1103        | 328.1867       | 164.5970         | 327.2027       | 164.1050         | 3  |
| 12 | 1285.7038       | 643.3556        | 1267.6933      | 634.3503         | P    | <b>244.1656</b>  | 122.5864        | 227.1390       | 114.0731         |                |                  | 2  |
| 13 |                 |                 |                |                  | K    | <b>147.1128</b>  | 74.0600         | 130.0863       | 65.5468          |                |                  | 1  |

# Protein band 17 (+Mn): Bacterioferritin A

Variable modifications: Carbamidomethyl (C), Oxidation (M)  
 Cleavage by Trypsin: cuts C-term side of KR unless next residue is P  
 Sequence Coverage: 79%

Matched peptides shown in **Bold Red**

1 **MQGNQAVVDY** MNELLSGELA ARDQYFIHSR LYSEWGYTKL FERLNHEMEE  
 51 **ETTHAEDFIR** RILMLGGTPK MARSELNIGT DVVSLKADL QTEYEVDRDL  
 101 **KKGIKLCEEA** QDYVTRDLMV AQLKDTEEDH AHWLEQQRLR IELIGEGNYY  
 151 **QSQL**

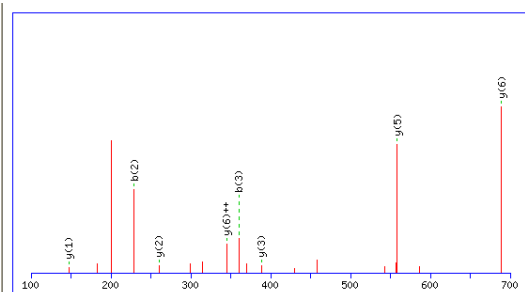

Monoisotopic mass of neutral peptide Mr(calc): 916.5052  
 Ions Score: 23 Expect: 1e+02  
 Matches (**Bold Red**): 8/60 fragment ions using 21 most intense peaks

Score: 583

M<sub>r</sub>: 17962

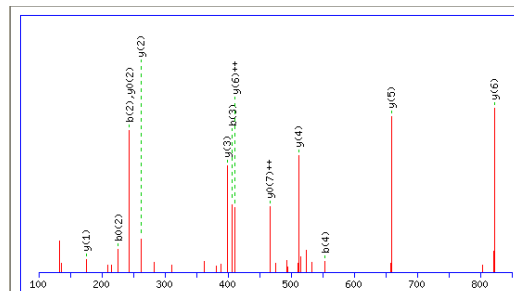

Monoisotopic mass of neutral peptide Mr(calc): 1064.5039  
 Ions Score: 47 Expect: 0.36  
 Matches (**Bold Red**): 13/80 fragment ions using 18 most intense peaks

| # | b               | b <sup>++</sup> | b*       | b <sup>+++</sup> | b <sup>0</sup>  | b <sup>0++</sup> | Seq.     | y               | y <sup>++</sup> | y*       | y <sup>+++</sup> | y <sup>0</sup>  | y <sup>0++</sup> | # |
|---|-----------------|-----------------|----------|------------------|-----------------|------------------|----------|-----------------|-----------------|----------|------------------|-----------------|------------------|---|
| 1 | 116.0342        | 58.5207         |          |                  | 98.0237         | 49.5155          | <b>D</b> |                 |                 |          |                  |                 |                  | 8 |
| 2 | <b>244.0928</b> | 122.5500        | 227.0662 | 114.0368         | <b>226.0822</b> | 113.5448         | <b>Q</b> | 950.4843        | 475.7458        | 933.4577 | 467.2325         | 932.4737        | <b>466.7405</b>  | 7 |
| 3 | <b>407.1561</b> | 204.0817        | 390.1296 | 195.5684         | 389.1456        | 195.0764         | <b>Y</b> | <b>822.4257</b> | <b>411.7165</b> | 805.3992 | 403.2032         | 804.4151        | 402.7112         | 6 |
| 4 | <b>554.2245</b> | 277.6159        | 537.1980 | 269.1026         | 536.2140        | 268.6106         | <b>F</b> | <b>659.3624</b> | 330.1848        | 642.3358 | 321.6715         | 641.3518        | 321.1795         | 5 |
| 5 | 667.3086        | 334.1579        | 650.2821 | 325.6447         | 649.2980        | 325.1527         | <b>I</b> | <b>512.2940</b> | 256.6506        | 495.2674 | 248.1373         | 494.2834        | 247.6453         | 4 |
| 6 | 804.3675        | 402.6874        | 787.3410 | 394.1741         | 786.3570        | 393.6821         | <b>H</b> | <b>399.2099</b> | 200.1086        | 382.1833 | 191.5953         | 381.1993        | 191.1033         | 3 |
| 7 | 891.3995        | 446.2034        | 874.3730 | 437.6901         | 873.3890        | 437.1981         | <b>S</b> | <b>262.1510</b> | 131.5791        | 245.1244 | 123.0659         | <b>244.1404</b> | 122.5738         | 2 |
| 8 |                 |                 |          |                  |                 |                  | <b>R</b> | <b>175.1190</b> | 88.0631         | 158.0924 | 79.5498          |                 |                  | 1 |

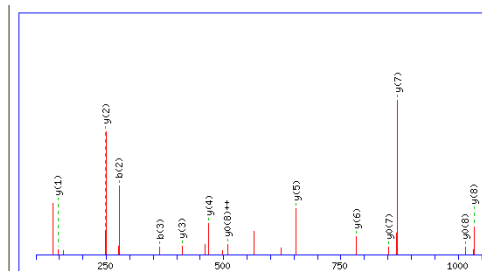

Monoisotopic mass of neutral peptide Mr(calc): 1145.5393  
 Ions Score: 62 Expect: 0.012  
 Matches (**Bold Red**): 13/74 fragment ions using 23 most intense peaks

| # | b               | b <sup>++</sup> | b*       | b <sup>+++</sup> | b <sup>0</sup> | b <sup>0++</sup> | Seq.     | y               | y <sup>++</sup> | y*       | y <sup>+++</sup> | # |
|---|-----------------|-----------------|----------|------------------|----------------|------------------|----------|-----------------|-----------------|----------|------------------|---|
| 1 | 116.0342        | 58.5207         |          |                  | 98.0237        | 49.5155          | <b>D</b> |                 |                 |          |                  | 8 |
| 2 | <b>229.1183</b> | 115.0628        |          |                  | 211.1077       | 106.0575         | <b>L</b> | 802.4855        | 401.7464        | 785.4590 | 393.2331         | 7 |
| 3 | <b>360.1588</b> | 180.5830        |          |                  | 342.1482       | 171.5777         | <b>M</b> | <b>689.4015</b> | <b>345.2044</b> | 672.3749 | 336.6911         | 6 |
| 4 | 459.2272        | 230.1172        |          |                  | 441.2166       | 221.1119         | <b>V</b> | <b>558.3610</b> | 279.6841        | 541.3344 | 271.1709         | 5 |
| 5 | 530.2643        | 265.6358        |          |                  | 512.2537       | 256.6305         | <b>A</b> | 459.2926        | 230.1499        | 442.2660 | 221.6366         | 4 |
| 6 | 658.3229        | 329.6651        | 641.2963 | 321.1518         | 640.3123       | 320.6598         | <b>Q</b> | <b>388.2554</b> | 194.6314        | 371.2289 | 186.1181         | 3 |
| 7 | 771.4069        | 386.2071        | 754.3804 | 377.6938         | 753.3964       | 377.2018         | <b>L</b> | <b>260.1969</b> | 130.6021        | 243.1703 | 122.0888         | 2 |
| 8 |                 |                 |          |                  |                |                  | <b>K</b> | <b>147.1128</b> | 74.0600         | 130.0863 | 65.5468          | 1 |

| # | b               | b <sup>++</sup> | b <sup>0</sup> | b <sup>0++</sup> | Seq.     | y                | y <sup>++</sup> | y*        | y <sup>+++</sup> | y <sup>0</sup>   | y <sup>0++</sup> | # |
|---|-----------------|-----------------|----------------|------------------|----------|------------------|-----------------|-----------|------------------|------------------|------------------|---|
| 1 | 114.0913        | 57.5493         |                |                  | <b>L</b> |                  |                 |           |                  |                  |                  | 9 |
| 2 | <b>277.1547</b> | 139.0810        |                |                  | <b>Y</b> | <b>1033.4625</b> | 517.2349        | 1016.4360 | 508.7216         | <b>1015.4520</b> | <b>508.2296</b>  | 8 |
| 3 | <b>364.1867</b> | 182.5970        | 346.1761       | 173.5917         | <b>S</b> | <b>870.3992</b>  | 435.7032        | 853.3727  | 427.1900         | <b>852.3886</b>  | 426.6980         | 7 |
| 4 | 493.2293        | 247.1183        | 475.2187       | 238.1130         | <b>E</b> | <b>783.3672</b>  | 392.1872        | 766.3406  | 383.6740         | 765.3566         | 383.1819         | 6 |
| 5 | 679.3086        | 340.1579        | 661.2980       | 331.1527         | <b>W</b> | <b>654.3246</b>  | 327.6659        | 637.2980  | 319.1527         | 636.3140         | 318.6607         | 5 |
| 6 | 736.3301        | 368.6687        | 718.3195       | 359.6634         | <b>G</b> | <b>468.2453</b>  | 234.6263        | 451.2187  | 226.1130         | 450.2347         | 225.6210         | 4 |
| 7 | 899.3934        | 450.2003        | 881.3828       | 441.1951         | <b>Y</b> | <b>411.2238</b>  | 206.1155        | 394.1973  | 197.6023         | 393.2132         | 197.1103         | 3 |
| 8 | 1000.4411       | 500.7242        | 982.4305       | 491.7189         | <b>T</b> | <b>248.1605</b>  | 124.5839        | 231.1339  | 116.0706         | 230.1499         | 115.5786         | 2 |
| 9 |                 |                 |                |                  | <b>K</b> | <b>147.1128</b>  | 74.0600         | 130.0863  | 65.5468          |                  |                  | 1 |

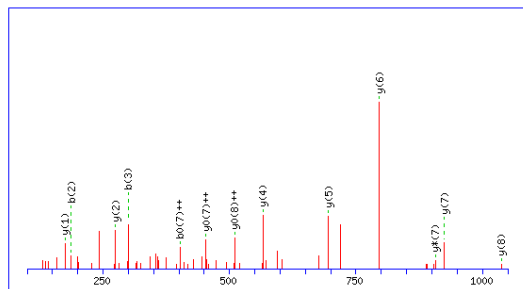

Monoisotopic mass of neutral peptide Mr(calc): 1222.5830  
 Ions Score: 62 Expect: 0.012  
 Matches (Bold Red): 13/96 fragment ions using 18 most intense peaks

| #  | b               | b <sup>++</sup> | b <sup>*</sup> | b <sup>+++</sup> | b <sup>0</sup> | b <sup>0++</sup> | Seq. | y                | y <sup>++</sup> | y <sup>*</sup>  | y <sup>+++</sup> | y <sup>0</sup> | y <sup>0++</sup> | #  |
|----|-----------------|-----------------|----------------|------------------|----------------|------------------|------|------------------|-----------------|-----------------|------------------|----------------|------------------|----|
| 1  | 72.0444         | 36.5258         |                |                  |                |                  | A    |                  |                 |                 |                  |                |                  | 10 |
| 2  | <b>187.0713</b> | 94.0393         |                |                  | 169.0608       | 85.0340          | D    | 1152.5531        | 576.7802        | 1135.5266       | 568.2669         | 1134.5426      | 567.7749         | 9  |
| 3  | <b>300.1554</b> | 150.5813        |                |                  | 282.1448       | 141.5761         | L    | <b>1037.5262</b> | 519.2667        | 1020.4997       | 510.7535         | 1019.5156      | <b>510.2615</b>  | 8  |
| 4  | 428.2140        | 214.6106        | 411.1874       | 206.0974         | 410.2034       | 205.6053         | Q    | <b>924.4421</b>  | 462.7247        | <b>907.4156</b> | 454.2114         | 906.4316       | <b>453.7194</b>  | 7  |
| 5  | 529.2617        | 265.1345        | 512.2351       | 256.6212         | 511.2511       | 256.1292         | T    | <b>796.3836</b>  | 398.6954        | 779.3570        | 390.1821         | 778.3730       | 389.6901         | 6  |
| 6  | 658.3042        | 329.6558        | 641.2777       | 321.1425         | 640.2937       | 320.6505         | E    | <b>695.3359</b>  | 348.1716        | 678.3093        | 339.6583         | 677.3253       | 339.1663         | 5  |
| 7  | 821.3676        | 411.1874        | 804.3410       | 402.6742         | 803.3570       | <b>402.1821</b>  | Y    | <b>566.2933</b>  | 283.6503        | 549.2667        | 275.1370         | 548.2827       | 274.6450         | 4  |
| 8  | 950.4102        | 475.7087        | 933.3836       | 467.1954         | 932.3996       | 466.7034         | E    | 403.2300         | 202.1186        | 386.2034        | 193.6053         | 385.2194       | 193.1133         | 3  |
| 9  | 1049.4786       | 525.2429        | 1032.4520      | 516.7297         | 1031.4680      | 516.2376         | V    | <b>274.1874</b>  | 137.5973        | 257.1608        | 129.0840         |                |                  | 2  |
| 10 |                 |                 |                |                  |                |                  | R    | <b>175.1190</b>  | 88.0631         | 158.0924        | 79.5498          |                |                  | 1  |

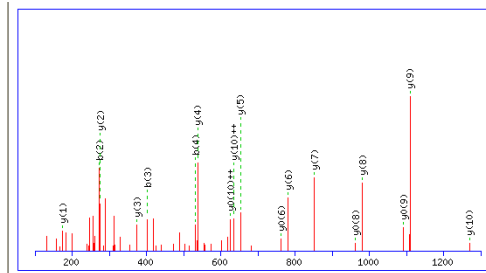

Monoisotopic mass of neutral peptide Mr(calc): 1382.6136  
 Variable modifications:  
 C2 : Carbamidomethyl (C)  
 Ions Score: 77 Expect: 0.00026  
 Matches (Bold Red): 18/104 fragment ions using 33 most intense peaks

| #  | b               | b <sup>++</sup> | b <sup>*</sup> | b <sup>+++</sup> | b <sup>0</sup> | b <sup>0++</sup> | Seq. | y                | y <sup>++</sup> | y <sup>*</sup> | y <sup>+++</sup> | y <sup>0</sup>   | y <sup>0++</sup> | #  |
|----|-----------------|-----------------|----------------|------------------|----------------|------------------|------|------------------|-----------------|----------------|------------------|------------------|------------------|----|
| 1  | 114.0913        | 57.5493         |                |                  |                |                  | L    |                  |                 |                |                  |                  |                  | 11 |
| 2  | <b>274.1220</b> | 137.5646        |                |                  |                |                  | C    | <b>1270.5368</b> | <b>635.7721</b> | 1253.5103      | 627.2588         | 1252.5263        | <b>626.7668</b>  | 10 |
| 3  | <b>403.1646</b> | 202.0859        |                |                  | 385.1540       | 193.0806         | E    | <b>1110.5062</b> | 555.7567        | 1093.4796      | 547.2435         | <b>1092.4956</b> | 546.7515         | 9  |
| 4  | <b>532.2072</b> | 266.6072        |                |                  | 514.1966       | 257.6019         | E    | <b>981.4636</b>  | 491.2354        | 964.4371       | 482.7222         | <b>963.4530</b>  | 482.2302         | 8  |
| 5  | 603.2443        | 302.1258        |                |                  | 585.2337       | 293.1205         | A    | <b>852.4210</b>  | 426.7141        | 835.3945       | 418.2009         | 834.4104         | 417.7089         | 7  |
| 6  | 731.3029        | 366.1551        | 714.2763       | 357.6418         | 713.2923       | 357.1498         | Q    | <b>781.3839</b>  | 391.1956        | 764.3573       | 382.6823         | <b>763.3733</b>  | 382.1903         | 6  |
| 7  | 846.3298        | 423.6685        | 829.3033       | 415.1553         | 828.3193       | 414.6633         | D    | <b>653.3253</b>  | 327.1663        | 636.2988       | 318.6530         | 635.3148         | 318.1610         | 5  |
| 8  | 1009.3931       | 505.2002        | 992.3666       | 496.6689         | 991.3826       | 496.1949         | Y    | <b>538.2984</b>  | 269.6528        | 521.2718       | 261.1396         | 520.2878         | 260.6475         | 4  |
| 9  | 1108.4616       | 554.7344        | 1091.4350      | 546.2211         | 1090.4510      | 545.7291         | V    | <b>375.2350</b>  | 188.1212        | 358.2085       | 179.6079         | 357.2245         | 179.1159         | 3  |
| 10 | 1209.5092       | 605.2583        | 1192.4827      | 596.7450         | 1191.4987      | 596.2530         | T    | <b>276.1666</b>  | 138.5870        | 259.1401       | 130.0737         | 258.1561         | 129.5817         | 2  |
| 11 |                 |                 |                |                  |                |                  | R    | <b>175.1190</b>  | 88.0631         | 158.0924       | 79.5498          |                  |                  | 1  |

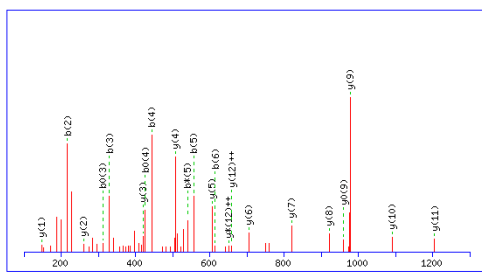

Monoisotopic mass of neutral peptide Mr(calc): 1533.7709  
 Variable modifications:  
 C12 : Carbamidomethyl (C)  
 Ions Score: 72 Expect: 0.0011  
 Matches (Bold Red): 22/144 fragment ions using 47 most intense peaks

| #  | b               | b <sup>++</sup> | b <sup>*</sup>  | b <sup>+++</sup> | b <sup>0</sup>  | b <sup>0++</sup> | Seq. | y                | y <sup>++</sup> | y <sup>*</sup> | y <sup>+++</sup> | y <sup>0</sup>  | y <sup>0++</sup> | #  |
|----|-----------------|-----------------|-----------------|------------------|-----------------|------------------|------|------------------|-----------------|----------------|------------------|-----------------|------------------|----|
| 1  | 88.0393         | 44.5233         |                 |                  | 70.0287         | 35.5180          | S    |                  |                 |                |                  |                 |                  | 14 |
| 2  | <b>217.0819</b> | 109.0446        |                 |                  | 199.0713        | 100.0393         | E    | 1447.7461        | 724.3767        | 1430.7196      | 715.8634         | 1429.7355       | 715.3714         | 13 |
| 3  | <b>330.1660</b> | 165.5866        |                 |                  | <b>312.1554</b> | 156.5813         | L    | 1318.7035        | <b>659.8554</b> | 1301.6770      | <b>651.3421</b>  | 1300.6930       | 650.8501         | 12 |
| 4  | <b>444.2089</b> | 222.6081        | 427.1823        | 214.0948         | <b>426.1983</b> | 213.6028         | N    | <b>1205.6195</b> | 603.3134        | 1188.5929      | 594.8001         | 1187.6089       | 594.3081         | 11 |
| 5  | <b>557.2930</b> | 279.1501        | <b>540.2664</b> | 270.6368         | 539.2824        | 270.1448         | I    | <b>1091.5765</b> | 546.2919        | 1074.5500      | 537.7786         | 1073.5660       | 537.2866         | 10 |
| 6  | <b>614.3144</b> | 307.6608        | 597.2879        | 299.1476         | 596.3039        | 298.6556         | G    | <b>978.4925</b>  | 489.7499        | 961.4659       | 481.2366         | <b>960.4819</b> | 480.7446         | 9  |
| 7  | 715.3621        | 358.1847        | 698.3355        | 349.6714         | 697.3515        | 349.1794         | T    | <b>921.4710</b>  | 461.2391        | 904.4445       | 452.7259         | 903.4604        | 452.2339         | 8  |
| 8  | 830.3890        | 415.6982        | 813.3625        | 407.1849         | 812.3785        | 406.6929         | D    | <b>820.4233</b>  | 410.7153        | 803.3968       | 402.2020         | 802.4128        | 401.7100         | 7  |
| 9  | 929.4575        | 465.2324        | 912.4309        | 456.7191         | 911.4469        | 456.2271         | V    | <b>705.3964</b>  | 353.2018        | 688.3698       | 344.6886         | 687.3858        | 344.1965         | 6  |
| 10 | 1028.5259       | 514.7666        | 1011.4993       | 506.2533         | 1010.5153       | 505.7613         | V    | <b>606.3280</b>  | 303.6676        | 589.3014       | 295.1543         | 588.3174        | 294.6623         | 5  |
| 11 | 1115.5579       | 558.2826        | 1098.5313       | 549.7693         | 1097.5473       | 549.2773         | S    | <b>507.2596</b>  | 254.1334        | 490.2330       | 245.6201         | 489.2490        | 245.1281         | 4  |
| 12 | 1275.5885       | 638.2979        | 1258.5620       | 629.7846         | 1257.5780       | 629.2926         | C    | <b>420.2275</b>  | 210.6174        | 403.2010       | 202.1041         |                 |                  | 3  |
| 13 | 1388.6726       | 694.8399        | 1371.6461       | 686.3267         | 1370.6620       | 685.8347         | L    | <b>260.1969</b>  | 130.6021        | 243.1703       | 122.0888         |                 |                  | 2  |
| 14 |                 |                 |                 |                  |                 |                  | K    | <b>147.1128</b>  | 74.0600         | 130.0863       | 65.5468          |                 |                  | 1  |

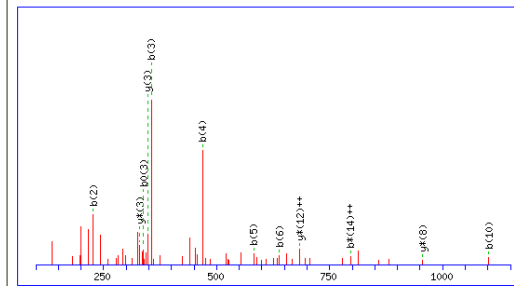

Monoisotopic mass of neutral peptide Mr(calc): 1738.8777  
 Ions Score: 21 Expect: 1.1e-02  
 Matches (Bold Red): 12/142 fragment ions using 25 most intense peaks

| #  | b                | b <sup>++</sup> | b <sup>*</sup> | b <sup>+++</sup> | b <sup>0</sup>  | b <sup>0++</sup> | Seq. | y               | y <sup>++</sup> | y <sup>*</sup>  | y <sup>+++</sup> | y <sup>0</sup> | y <sup>0++</sup> | #  |
|----|------------------|-----------------|----------------|------------------|-----------------|------------------|------|-----------------|-----------------|-----------------|------------------|----------------|------------------|----|
| 1  | 114.0913         | 57.5493         |                |                  |                 |                  | L    |                 |                 |                 |                  |                |                  | 15 |
| 2  | <b>227.1754</b>  | 114.0913        |                |                  |                 |                  | I    | 1626.8010       | 813.9041        | 1609.7744       | 805.3909         | 1608.7904      | 804.8988         | 14 |
| 3  | <b>356.2180</b>  | 178.6126        |                |                  | <b>338.2074</b> | 169.6074         | E    | 1513.7169       | 757.3621        | 1496.6904       | 748.8488         | 1495.7064      | 748.3568         | 13 |
| 4  | <b>469.3021</b>  | 235.1547        |                |                  | 451.2915        | 226.1494         | L    | 1384.6743       | 692.8408        | 1367.6478       | <b>684.3275</b>  | 1366.6638      | 683.8355         | 12 |
| 5  | <b>582.3861</b>  | 291.6967        |                |                  | 564.3756        | 282.6914         | I    | 1271.5903       | 636.2988        | 1254.5637       | 627.7855         | 1253.5797      | 627.2935         | 11 |
| 6  | <b>639.4076</b>  | 320.2074        |                |                  | 621.3970        | 311.2022         | G    | 1158.5062       | 579.7567        | 1141.4796       | 571.2435         | 1140.4956      | 570.7515         | 10 |
| 7  | 768.4502         | 384.7287        |                |                  | 750.4396        | 375.7234         | E    | 1101.4847       | 551.2460        | 1084.4582       | 542.7327         | 1083.4742      | 542.2407         | 9  |
| 8  | 825.4716         | 413.2395        |                |                  | 807.4611        | 404.2342         | G    | 972.4421        | 486.7247        | <b>955.4156</b> | 478.2114         | 954.4316       | 477.7194         | 8  |
| 9  | 939.5146         | 470.2609        | 922.4880       | 461.7477         | 921.5040        | 461.2556         | N    | 915.4207        | 458.2140        | 898.3941        | 449.7007         | 897.4101       | 449.2087         | 7  |
| 10 | <b>1102.5779</b> | 551.7926        | 1085.5514      | 543.2793         | 1084.5673       | 542.7873         | Y    | 801.3777        | 401.1925        | 784.3512        | 392.6792         | 783.3672       | 392.1872         | 6  |
| 11 | 1265.6412        | 633.3243        | 1248.6147      | 624.8110         | 1247.6307       | 624.3190         | Y    | 638.3144        | 319.6608        | 621.2879        | 311.1476         | 620.3039       | 310.6556         | 5  |
| 12 | 1393.6998        | 697.3535        | 1376.6733      | 688.8403         | 1375.6892       | 688.3483         | Q    | 475.2511        | 238.1292        | 458.2245        | 229.6159         | 457.2405       | 229.1239         | 4  |
| 13 | 1480.7318        | 740.8696        | 1463.7053      | 732.3563         | 1462.7213       | 731.8643         | S    | <b>347.1925</b> | 174.0999        | <b>330.1660</b> | 165.5866         | 329.1819       | 165.0946         | 3  |
| 14 | 1608.7904        | 804.8988        | 1591.7639      | <b>796.3856</b>  | 1590.7799       | 795.8936         | Q    | 260.1605        | 130.5839        | 243.1339        | 122.0706         |                |                  | 2  |
| 15 |                  |                 |                |                  |                 |                  | L    | 132.1019        | 66.5546         |                 |                  |                |                  | 1  |

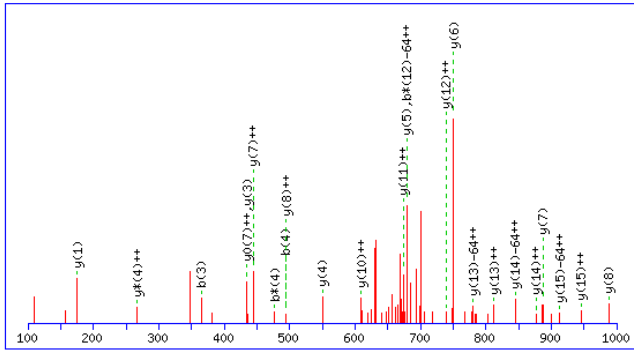

Monoisotopic mass of neutral peptide Mr(calc): 2115.9167  
 Variable modifications:  
 M5 : Oxidation (M), with neutral losses 0.0000 (shown in table), 63.9983  
 Ions Score: 52 Expect: 0.054  
 Matches (**Bold Red**): 24/274 fragment ions using 44 most intense peaks

| #  | b               | b <sup>++</sup> | b*              | b <sup>+++</sup> | b <sup>0</sup> | b <sup>0++</sup> | Seq. | y               | y <sup>++</sup> | y*        | y <sup>+++</sup> | y <sup>0</sup> | y <sup>0++</sup> | #  |
|----|-----------------|-----------------|-----------------|------------------|----------------|------------------|------|-----------------|-----------------|-----------|------------------|----------------|------------------|----|
| 1  | 114.0913        | 57.5493         |                 |                  |                |                  | L    |                 |                 |           |                  |                |                  | 17 |
| 2  | 228.1343        | 114.5708        | 211.1077        | 106.0575         |                |                  | N    | 2003.8400       | 1002.4236       | 1986.8134 | 993.9103         | 1985.8294      | 993.4183         | 16 |
| 3  | <b>365.1932</b> | 183.1002        | 348.1666        | 174.5870         |                |                  | H    | 1889.7970       | <b>945.4022</b> | 1872.7705 | 936.8889         | 1871.7865      | 936.3969         | 15 |
| 4  | <b>494.2358</b> | 247.6215        | <b>477.2092</b> | 239.1082         | 476.2252       | 238.6162         | E    | 1752.7381       | <b>876.8727</b> | 1735.7116 | 868.3594         | 1734.7276      | 867.8674         | 14 |
| 5  | 641.2712        | 321.1392        | 624.2446        | 312.6260         | 623.2606       | 312.1339         | M    | 1623.6955       | <b>812.3514</b> | 1606.6690 | 803.8381         | 1605.6850      | 803.3461         | 13 |
| 6  | 770.3138        | 385.6605        | 753.2872        | 377.1472         | 752.3032       | 376.6552         | E    | 1476.6601       | <b>738.8337</b> | 1459.6336 | 730.3204         | 1458.6496      | 729.8284         | 12 |
| 7  | 899.3564        | 450.1818        | 882.3298        | 441.6685         | 881.3458       | 441.1765         | E    | 1347.6175       | <b>674.3124</b> | 1330.5910 | 665.7991         | 1329.6070      | 665.3071         | 11 |
| 8  | 1028.3990       | 514.7031        | 1011.3724       | 506.1898         | 1010.3884      | 505.6978         | E    | 1218.5749       | <b>609.7911</b> | 1201.5484 | 601.2778         | 1200.5644      | 600.7858         | 10 |
| 9  | 1129.4466       | 565.2270        | 1112.4201       | 556.7137         | 1111.4361      | 556.2217         | T    | 1089.5324       | 545.2698        | 1072.5058 | 536.7565         | 1071.5218      | 536.2645         | 9  |
| 10 | 1230.4943       | 615.7508        | 1213.4678       | 607.2375         | 1212.4837      | 606.7455         | T    | <b>988.4847</b> | <b>494.7460</b> | 971.4581  | 486.2327         | 970.4741       | 485.7407         | 8  |
| 11 | 1367.5532       | 684.2803        | 1350.5267       | 675.7670         | 1349.5427      | 675.2750         | H    | <b>887.4370</b> | <b>444.2221</b> | 870.4104  | 435.7089         | 869.4264       | <b>435.2169</b>  | 7  |
| 12 | 1438.5903       | 719.7988        | 1421.5638       | 711.2855         | 1420.5798      | 710.7935         | A    | <b>750.3781</b> | 375.6927        | 733.3515  | 367.1794         | 732.3675       | 366.6874         | 6  |
| 13 | 1567.6329       | 784.3201        | 1550.6064       | 775.8068         | 1549.6224      | 775.3148         | E    | <b>679.3410</b> | 340.1741        | 662.3144  | 331.6608         | 661.3304       | 331.1688         | 5  |
| 14 | 1682.6599       | 841.8336        | 1665.6333       | 833.3203         | 1664.6493      | 832.8283         | D    | <b>550.2984</b> | 275.6528        | 533.2718  | <b>267.1396</b>  | 532.2878       | 266.6475         | 4  |
| 15 | 1829.7283       | 915.3678        | 1812.7017       | 906.8545         | 1811.7177      | 906.3625         | F    | <b>435.2714</b> | 218.1394        | 418.2449  | 209.6261         |                |                  | 3  |
| 16 | 1942.8124       | 971.9098        | 1925.7858       | 963.3965         | 1924.8018      | 962.9045         | I    | 288.2030        | 144.6051        | 271.1765  | 136.0919         |                |                  | 2  |
| 17 |                 |                 |                 |                  |                |                  | R    | <b>175.1190</b> | 88.0631         | 158.0924  | 79.5498          |                |                  | 1  |

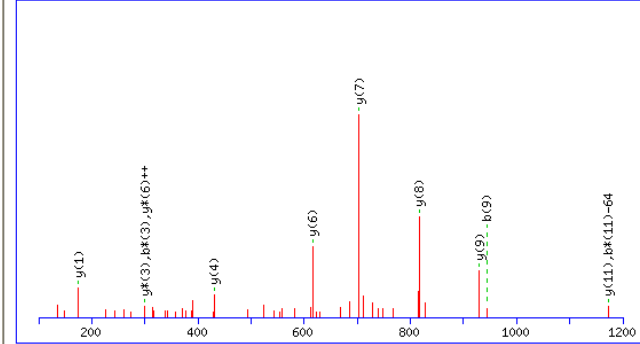

Monoisotopic mass of neutral peptide Mr(calc): 2424.1413  
 Variable modifications:  
 M11 : Oxidation (M), with neutral losses 0.0000 (shown in table), 63.9983  
 Ions Score: 58 Expect: 0.014  
 Matches (**Bold Red**): 12/352 fragment ions using 11 most intense peaks

| #  | b               | b <sup>++</sup> | b*              | b <sup>+++</sup> | b <sup>v</sup> | b <sup>v++</sup> | Seq. | y                | y <sup>++</sup> | y*              | y <sup>+++</sup> | y <sup>v</sup> | y <sup>v++</sup> | #  |
|----|-----------------|-----------------|-----------------|------------------|----------------|------------------|------|------------------|-----------------|-----------------|------------------|----------------|------------------|----|
| 1  | 132.0478        | 66.5275         |                 |                  |                |                  | M    |                  |                 |                 |                  |                |                  | 22 |
| 2  | 260.1063        | 130.5568        | 243.0798        | 122.0435         |                |                  | Q    | 2294.1081        | 1147.5577       | 2277.0816       | 1139.0444        | 2276.0976      | 1138.5524        | 21 |
| 3  | 317.1278        | 159.0675        | <b>300.1013</b> | 150.5543         |                |                  | G    | 2166.0496        | 1083.5284       | 2149.0230       | 1075.0151        | 2148.0390      | 1074.5231        | 20 |
| 4  | 431.1707        | 216.0890        | 414.1442        | 207.5757         |                |                  | N    | 2109.0281        | 1055.0177       | 2092.0016       | 1046.5044        | 2091.0175      | 1046.0124        | 19 |
| 5  | 559.2293        | 280.1183        | 542.2028        | 271.6050         |                |                  | Q    | 1994.9852        | 997.9962        | 1977.9586       | 989.4830         | 1976.9746      | 988.9909         | 18 |
| 6  | 630.2664        | 315.6368        | 613.2399        | 307.1236         |                |                  | A    | 1866.9266        | 933.9669        | 1849.9000       | 925.4537         | 1848.9160      | 924.9617         | 17 |
| 7  | 729.3348        | 365.1711        | 712.3083        | 356.6578         |                |                  | V    | 1795.8895        | 898.4484        | 1778.8629       | 889.9351         | 1777.8789      | 889.4431         | 16 |
| 8  | 828.4032        | 414.7053        | 811.3767        | 406.1920         |                |                  | V    | 1696.8211        | 848.9142        | 1679.7945       | 840.4009         | 1678.8105      | 839.9089         | 15 |
| 9  | <b>943.4302</b> | 472.2187        | 926.4036        | 463.7055         | 925.4196       | 463.2135         | D    | 1597.7527        | 799.3800        | 1580.7261       | 790.8667         | 1579.7421      | 790.3747         | 14 |
| 10 | 1106.4935       | 553.7504        | 1089.4670       | 545.2371         | 1088.4830      | 544.7451         | Y    | 1482.7257        | 741.8665        | 1465.6992       | 733.3532         | 1464.7151      | 732.8612         | 13 |
| 11 | 1253.5289       | 627.2681        | 1236.5024       | 618.7548         | 1235.5184      | 618.2628         | M    | 1319.6624        | 660.3348        | 1302.6358       | 651.8216         | 1301.6518      | 651.3295         | 12 |
| 12 | 1367.5719       | 684.2896        | 1350.5453       | 675.7763         | 1349.5613      | 675.2843         | N    | <b>1172.6270</b> | 586.8171        | 1155.6004       | 578.3039         | 1154.6164      | 577.8118         | 11 |
| 13 | 1496.6144       | 748.8109        | 1479.5879       | 740.2976         | 1478.6039      | 739.8056         | E    | 1058.5841        | 529.7957        | 1041.5575       | 521.2824         | 1040.5735      | 520.7904         | 10 |
| 14 | 1609.6985       | 805.3529        | 1592.6720       | 796.8396         | 1591.6879      | 796.3476         | L    | <b>929.5415</b>  | 465.2744        | 912.5149        | 456.7611         | 911.5309       | 456.2691         | 9  |
| 15 | 1722.7826       | 861.8949        | 1705.7560       | 853.3817         | 1704.7720      | 852.8896         | L    | <b>816.4574</b>  | 408.7323        | 799.4308        | 400.2191         | 798.4468       | 399.7271         | 8  |
| 16 | 1809.8146       | 905.4109        | 1792.7881       | 896.8977         | 1791.8040      | 896.4057         | S    | <b>703.3733</b>  | 352.1903        | 686.3468        | 343.6770         | 685.3628       | 343.1850         | 7  |
| 17 | 1866.8361       | 933.9217        | 1849.8095       | 925.4084         | 1848.8255      | 924.9164         | G    | <b>616.3413</b>  | 308.6743        | 599.3148        | <b>300.1610</b>  | 598.3307       | 299.6690         | 6  |
| 18 | 1995.8787       | 998.4430        | 1978.8521       | 989.9297         | 1977.8681      | 989.4377         | E    | 559.3198         | 280.1636        | 542.2933        | 271.6503         | 541.3093       | 271.1583         | 5  |
| 19 | 2108.9627       | 1054.9850       | 2091.9362       | 1046.4717        | 2090.9522      | 1045.9797        | L    | <b>430.2772</b>  | 215.6423        | 413.2507        | 207.1290         |                |                  | 4  |
| 20 | 2179.9998       | 1090.5036       | 2162.9733       | 1081.9903        | 2161.9893      | 1081.4983        | A    | 317.1932         | 159.1002        | <b>300.1666</b> | 150.5870         |                |                  | 3  |
| 21 | 2251.0370       | 1126.0221       | 2234.0104       | 1117.5088        | 2233.0264      | 1117.0168        | A    | 246.1561         | 123.5817        | 229.1295        | 115.0684         |                |                  | 2  |
| 22 |                 |                 |                 |                  |                |                  | R    | <b>175.1190</b>  | 88.0631         | 158.0924        | 79.5498          |                |                  | 1  |



# Protein band 17 (+Mn): 50S ribosomal protein L9

Score: 572

M<sub>r</sub>: 15687

Variable modifications: Carbamidomethyl (C), Oxidation (M)  
 Cleavage by Trypsin: cuts C-term side of KR unless next residue is P  
 Sequence Coverage: 75%

Matched peptides shown in **Bold Red**

**1** MQIILLEKIG GLGNLGDIVT VKNGYARNFL IPAGKAKRAT EAMKKEFEAR  
**51** RAELEAKQAE ILADARARQE KLDGQTVTVA QKAGVDGRLF GSVTNADIAA  
**101** AIVAAGIEAV KANVRLPNGP LKAVGEYEVE VALHTDAVAK ITVAIVAAEA  
**151**

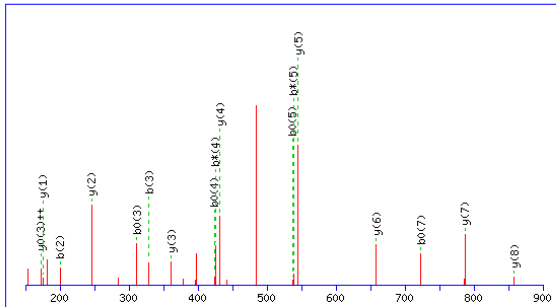

Monoisotopic mass of neutral peptide Mr(calc): 985.5192  
 Ions Score: 69 Expect: 0.0026  
 Matches (**Bold Red**): 17/88 Fragment ions using 28 most intense peaks

| # | b               | b <sup>++</sup> | b <sup>*</sup>  | b <sup>+++</sup> | b <sup>0</sup>  | b <sup>0++</sup> | Seq.     | y               | y <sup>++</sup> | y <sup>*</sup> | y <sup>+++</sup> | y <sup>0</sup> | y <sup>0++</sup> | # |
|---|-----------------|-----------------|-----------------|------------------|-----------------|------------------|----------|-----------------|-----------------|----------------|------------------|----------------|------------------|---|
| 1 | 129.0659        | 65.0366         | 112.0393        | 56.5233          |                 |                  | <b>Q</b> |                 |                 |                |                  |                |                  | 9 |
| 2 | <b>200.1030</b> | 100.5551        | 183.0764        | 92.0418          |                 |                  | <b>A</b> | <b>858.4680</b> | 429.7376        | 841.4414       | 421.2243         | 840.4574       | 420.7323         | 8 |
| 3 | <b>329.1456</b> | 165.0764        | 312.1190        | 156.5631         | <b>311.1350</b> | 156.0711         | <b>E</b> | <b>787.4308</b> | 394.2191        | 770.4043       | 385.7058         | 769.4203       | 385.2138         | 7 |
| 4 | 442.2296        | 221.6185        | <b>425.2031</b> | 213.1052         | <b>424.2191</b> | 212.6132         | <b>I</b> | <b>658.3883</b> | 329.6978        | 641.3617       | 321.1845         | 640.3777       | 320.6925         | 6 |
| 5 | 555.3137        | 278.1605        | <b>538.2871</b> | 269.6472         | <b>537.3031</b> | 269.1552         | <b>L</b> | <b>545.3042</b> | 273.1557        | 528.2776       | 264.6425         | 527.2936       | 264.1504         | 5 |
| 6 | 626.3508        | 313.6790        | 609.3243        | 305.1658         | 608.3402        | 304.6738         | <b>A</b> | <b>432.2201</b> | 216.6137        | 415.1936       | 208.1004         | 414.2096       | 207.6084         | 4 |
| 7 | 741.3777        | 371.1925        | 724.3512        | 362.6792         | <b>723.3672</b> | 362.1872         | <b>D</b> | <b>361.1830</b> | 181.0951        | 344.1565       | 172.5819         | 343.1724       | <b>172.0899</b>  | 3 |
| 8 | 812.4149        | 406.7111        | 795.3883        | 398.1978         | 794.4043        | 397.7058         | <b>A</b> | <b>246.1561</b> | 123.5817        | 229.1295       | 115.0684         |                |                  | 2 |
| 9 |                 |                 |                 |                  |                 |                  | <b>R</b> | <b>175.1190</b> | 88.0631         | 158.0924       | 79.5498          |                |                  | 1 |

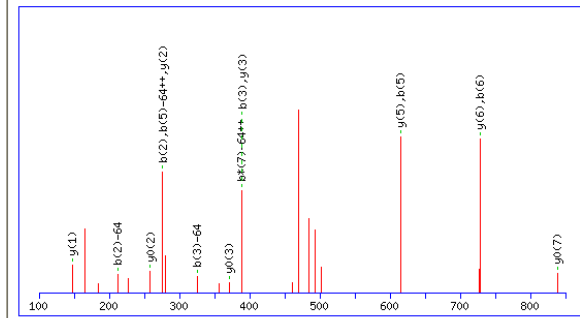

Monoisotopic mass of neutral peptide Mr(calc): 1002.5783  
 Variable modifications:  
 M1 : Oxidation (M), with neutral losses 0.0000 (shown in table), 63.9983  
 Ions Score: 40 Expect: 2.2  
 Matches (**Bold Red**): 16/96 fragment ions using 17 most intense peaks

| # | b               | b <sup>++</sup> | b <sup>*</sup> | b <sup>+++</sup> | b <sup>0</sup> | b <sup>0++</sup> | Seq.     | y               | y <sup>++</sup> | y <sup>*</sup> | y <sup>+++</sup> | y <sup>0</sup>  | y <sup>0++</sup> | # |
|---|-----------------|-----------------|----------------|------------------|----------------|------------------|----------|-----------------|-----------------|----------------|------------------|-----------------|------------------|---|
| 1 | 148.0427        | 74.5250         |                |                  |                |                  | <b>M</b> |                 |                 |                |                  |                 |                  | 8 |
| 2 | <b>276.1013</b> | 138.5543        | 259.0747       | 130.0410         |                |                  | <b>Q</b> | 856.5502        | 428.7788        | 839.5237       | 420.2655         | <b>838.5397</b> | 419.7735         | 7 |
| 3 | <b>389.1853</b> | 195.0963        | 372.1588       | 186.5830         |                |                  | <b>I</b> | <b>728.4917</b> | 364.7495        | 711.4651       | 356.2362         | 710.4811        | 355.7442         | 6 |
| 4 | 502.2694        | 251.6383        | 485.2428       | 243.1251         |                |                  | <b>I</b> | <b>615.4076</b> | 308.2074        | 598.3810       | 299.6942         | 597.3970        | 299.2022         | 5 |
| 5 | <b>615.3535</b> | 308.1804        | 598.3269       | 299.6671         |                |                  | <b>L</b> | 502.3235        | 251.6654        | 485.2970       | 243.1521         | 484.3130        | 242.6601         | 4 |
| 6 | <b>728.4375</b> | 364.7224        | 711.4110       | 356.2091         |                |                  | <b>L</b> | <b>389.2395</b> | 195.1234        | 372.2129       | 186.6101         | <b>371.2289</b> | 186.1181         | 3 |
| 7 | 857.4801        | 429.2437        | 840.4536       | 420.7304         | 839.4695       | 420.2384         | <b>E</b> | <b>276.1554</b> | 138.5813        | 259.1288       | 130.0681         | <b>258.1448</b> | 129.5761         | 2 |
| 8 |                 |                 |                |                  |                |                  | <b>K</b> | <b>147.1128</b> | 74.0600         | 130.0863       | 65.5468          |                 |                  | 1 |

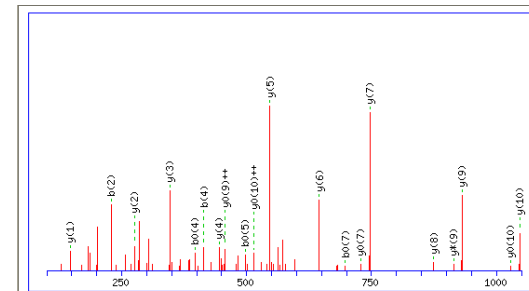

Monoisotopic mass of neutral peptide Mr(calc): 1158.6245  
 Ions Score: 88 Expect: 3.1e-05  
 Matches (**Bold Red**): 20/104 fragment ions using 33 most intense peaks

| #  | b               | b <sup>++</sup> | b <sup>*</sup> | b <sup>+++</sup> | b <sup>0</sup>  | b <sup>0++</sup> | Seq.     | y                | y <sup>++</sup> | y <sup>*</sup>  | y <sup>+++</sup> | y <sup>0</sup>   | y <sup>0++</sup> | #  |
|----|-----------------|-----------------|----------------|------------------|-----------------|------------------|----------|------------------|-----------------|-----------------|------------------|------------------|------------------|----|
| 1  | 114.0913        | 57.5493         |                |                  |                 |                  | <b>L</b> |                  |                 |                 |                  |                  |                  | 11 |
| 2  | <b>229.1183</b> | 115.0628        |                |                  | 211.1077        | 106.0575         | <b>D</b> | <b>1046.5477</b> | 523.7775        | 1029.5211       | 515.2642         | <b>1028.5371</b> | <b>514.7722</b>  | 10 |
| 3  | 286.1397        | 143.5735        |                |                  | 268.1292        | 134.5682         | <b>G</b> | <b>931.5207</b>  | 466.2640        | <b>914.4942</b> | 457.7507         | 913.5102         | <b>457.2587</b>  | 9  |
| 4  | <b>414.1983</b> | 207.6028        | 397.1718       | 199.0895         | <b>396.1878</b> | 198.5975         | <b>Q</b> | <b>874.4993</b>  | 437.7533        | 857.4727        | 429.2400         | 856.4887         | 428.7480         | 8  |
| 5  | 515.2460        | 258.1266        | 498.2195       | 249.6134         | <b>497.2354</b> | 249.1214         | <b>T</b> | <b>746.4407</b>  | 373.7240        | 729.4141        | 365.2107         | <b>728.4301</b>  | 364.7187         | 7  |
| 6  | 614.3144        | 307.6608        | 597.2879       | 299.1476         | 596.3039        | 298.6556         | <b>V</b> | <b>645.3930</b>  | 323.2001        | 628.3665        | 314.6869         | 627.3824         | 314.1949         | 6  |
| 7  | 715.3621        | 358.1847        | 698.3355       | 349.6714         | <b>697.3515</b> | 349.1794         | <b>T</b> | <b>546.3246</b>  | 273.6659        | 529.2980        | 265.1527         | 528.3140         | 264.6607         | 5  |
| 8  | 814.4305        | 407.7189        | 797.4040       | 399.2056         | 796.4199        | 398.7136         | <b>V</b> | <b>445.2769</b>  | 223.1421        | 428.2504        | 214.6288         |                  |                  | 4  |
| 9  | 885.4676        | 443.2375        | 868.4411       | 434.7242         | 867.4571        | 434.2322         | <b>A</b> | <b>346.2085</b>  | 173.6079        | 329.1819        | 165.0946         |                  |                  | 3  |
| 10 | 1013.5262       | 507.2667        | 996.4997       | 498.7535         | 995.5156        | 498.2615         | <b>Q</b> | <b>275.1714</b>  | 138.0893        | 258.1448        | 129.5761         |                  |                  | 2  |
| 11 |                 |                 |                |                  |                 |                  | <b>K</b> | <b>147.1128</b>  | 74.0600         | 130.0863        | 65.5468          |                  |                  | 1  |



# Protein band 17 (+Mn): 30S ribosomal protein S9

Score: 200

M<sub>r</sub>: 14363

Variable modifications: Carbamidomethyl (C), Oxidation (M)  
 Cleavage by Trypsin: cuts C-term side of KR unless next residue is P  
 Sequence Coverage: 40%

Matched peptides shown in **Bold Red**

1 MNGKY<sup>Y</sup>YG<sup>TG</sup> RRKSSVARV<sup>F</sup> LKIGIGQIIV NGRPVDEFFA RETSRM<sup>V</sup>V<sup>R</sup>Q  
 51 **PLVLTENAES** LDIK<sup>V</sup>NVVG<sup>G</sup> **GETGQSGAIR** HGITRALID<sup>F</sup> **DAALKPALSQ**  
 101 **AGFVTRDARE** VERKKPGLR<sup>K</sup> ARR<sup>K</sup>Q<sup>F</sup>SK<sup>R</sup>

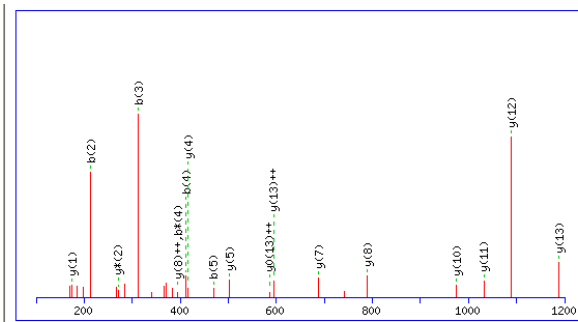

Monoisotopic mass of neutral peptide Mr(calc): 1499.7692  
 Ions Score: 67 Expect: 0.0034  
 Matches (**Bold Red**): 18/156 fragment ions using 28 most intense peaks

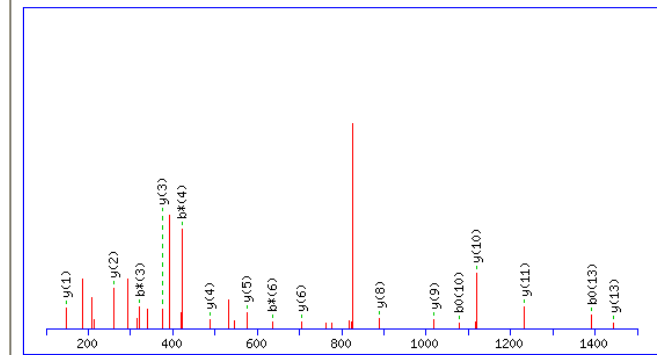

Monoisotopic mass of neutral peptide Mr(calc): 1668.8934  
 Ions Score: 72 Expect: 0.00087  
 Matches (**Bold Red**): 16/154 fragment ions using 28 most intense peaks

| #  | b               | b <sup>++</sup> | b <sup>+</sup>  | b <sup>+++</sup> | b <sup>0</sup> | b <sup>0++</sup> | Seq. | y                | y <sup>++</sup> | y <sup>+</sup>  | y <sup>+++</sup> | y <sup>0</sup> | y <sup>0++</sup> | #  |
|----|-----------------|-----------------|-----------------|------------------|----------------|------------------|------|------------------|-----------------|-----------------|------------------|----------------|------------------|----|
| 1  | 100.0757        | 50.5415         |                 |                  |                |                  | V    |                  |                 |                 |                  |                |                  | 16 |
| 2  | <b>214.1186</b> | 107.5629        | 197.0921        | 99.0497          |                |                  | N    | 1401.7081        | 701.3577        | 1384.6815       | 692.8444         | 1383.6975      | 692.3524         | 15 |
| 3  | <b>313.1870</b> | 157.0972        | 296.1605        | 148.5839         |                |                  | V    | 1287.6652        | 644.3362        | 1270.6386       | 635.8229         | 1269.6546      | 635.3309         | 14 |
| 4  | <b>412.2554</b> | 206.6314        | <b>395.2289</b> | 198.1181         |                |                  | V    | <b>1188.5967</b> | <b>594.8020</b> | 1171.5702       | 586.2887         | 1170.5862      | <b>585.7967</b>  | 13 |
| 5  | <b>469.2769</b> | 235.1421        | 452.2504        | 226.6288         |                |                  | G    | <b>1089.5283</b> | 545.2678        | 1072.5018       | 536.7545         | 1071.5178      | 536.2625         | 12 |
| 6  | 526.2984        | 263.6528        | 509.2718        | 255.1396         |                |                  | G    | <b>1032.5069</b> | 516.7571        | 1015.4803       | 508.2438         | 1014.4963      | 507.7518         | 11 |
| 7  | 583.3198        | 292.1636        | 566.2933        | 283.6503         |                |                  | G    | <b>975.4854</b>  | 488.2463        | 958.4589        | 479.7331         | 957.4748       | 479.2411         | 10 |
| 8  | 712.3624        | 356.6849        | 695.3359        | 348.1716         | 694.3519       | 347.6796         | E    | 918.4639         | 459.7356        | 901.4374        | 451.2223         | 900.4534       | 450.7303         | 9  |
| 9  | 813.4101        | 407.2087        | 796.3836        | 398.6954         | 795.3995       | 398.2034         | T    | <b>789.4213</b>  | <b>395.2143</b> | 772.3948        | 386.7010         | 771.4108       | 386.2090         | 8  |
| 10 | 870.4316        | 435.7194        | 853.4050        | 427.2062         | 852.4210       | 426.7141         | G    | <b>688.3737</b>  | 344.6905        | 671.3471        | 336.1772         | 670.3631       | 335.6852         | 7  |
| 11 | 998.4902        | 499.7487        | 981.4636        | 491.2354         | 980.4796       | 490.7434         | Q    | 631.3522         | 316.1797        | 614.3257        | 307.6665         | 613.3416       | 307.1745         | 6  |
| 12 | 1085.5222       | 543.2647        | 1068.4956       | 534.7515         | 1067.5116      | 534.2594         | S    | <b>503.2936</b>  | 252.1504        | 486.2671        | 243.6372         | 485.2831       | 243.1452         | 5  |
| 13 | 1142.5436       | 571.7755        | 1125.5171       | 563.2622         | 1124.5331      | 562.7702         | G    | <b>416.2616</b>  | 208.6344        | 399.2350        | 200.1212         |                |                  | 4  |
| 14 | 1213.5808       | 607.2940        | 1196.5542       | 598.7807         | 1195.5702      | 598.2887         | A    | 359.2401         | 180.1237        | 342.2136        | 171.6104         |                |                  | 3  |
| 15 | 1326.6648       | 663.8360        | 1309.6383       | 655.3228         | 1308.6543      | 654.8308         | I    | 288.2030         | 144.6051        | <b>271.1765</b> | 136.0919         |                |                  | 2  |
| 16 |                 |                 |                 |                  |                |                  | R    | <b>175.1190</b>  | 88.0631         | 158.0924        | 79.5498          |                |                  | 1  |

| #  | b         | b <sup>++</sup> | b <sup>+</sup>  | b <sup>+++</sup> | b <sup>0</sup>   | b <sup>0++</sup> | Seq. | y                | y <sup>++</sup> | y <sup>+</sup> | y <sup>+++</sup> | y <sup>0</sup> | y <sup>0++</sup> | #  |
|----|-----------|-----------------|-----------------|------------------|------------------|------------------|------|------------------|-----------------|----------------|------------------|----------------|------------------|----|
| 1  | 129.0659  | 65.0366         | 112.0393        | 56.5233          |                  |                  | Q    |                  |                 |                |                  |                |                  | 15 |
| 2  | 226.1186  | 113.5629        | 209.0921        | 105.0497         |                  |                  | P    | 1541.8421        | 771.4247        | 1524.8156      | 762.9114         | 1523.8316      | 762.4194         | 14 |
| 3  | 339.2027  | 170.1050        | <b>322.1761</b> | 161.5917         |                  |                  | L    | <b>1444.7894</b> | 722.8983        | 1427.7628      | 714.3850         | 1426.7788      | 713.8930         | 13 |
| 4  | 438.2711  | 219.6392        | <b>421.2445</b> | 211.1259         |                  |                  | V    | 1331.7053        | 666.3563        | 1314.6787      | 657.8430         | 1313.6947      | 657.3510         | 12 |
| 5  | 551.3552  | 276.1812        | 534.3286        | 267.6679         |                  |                  | L    | <b>1232.6369</b> | 616.8221        | 1215.6103      | 608.3088         | 1214.6263      | 607.8168         | 11 |
| 6  | 652.4028  | 326.7051        | <b>635.3763</b> | 318.1918         | 634.3923         | 317.6998         | T    | <b>1119.5528</b> | 560.2800        | 1102.5263      | 551.7668         | 1101.5422      | 551.2748         | 10 |
| 7  | 781.4454  | 391.2264        | 764.4189        | 382.7131         | 763.4349         | 382.2211         | E    | <b>1018.5051</b> | 509.7562        | 1001.4786      | 501.2429         | 1000.4946      | 500.7509         | 9  |
| 8  | 895.4884  | 448.2478        | 878.4618        | 439.7345         | 877.4778         | 439.2425         | N    | <b>889.4625</b>  | 445.2349        | 872.4360       | 436.7216         | 871.4520       | 436.2296         | 8  |
| 9  | 966.5255  | 483.7664        | 949.4989        | 475.2531         | 948.5149         | 474.7611         | A    | 775.4196         | 388.2134        | 758.3931       | 379.7002         | 757.4090       | 379.2082         | 7  |
| 10 | 1095.5681 | 548.2877        | 1078.5415       | 539.7744         | <b>1077.5575</b> | 539.2824         | E    | <b>704.3825</b>  | 352.6949        | 687.3559       | 344.1816         | 686.3719       | 343.6896         | 6  |
| 11 | 1182.6001 | 591.8037        | 1165.5735       | 583.2904         | 1164.5895        | 582.7984         | S    | <b>575.3399</b>  | 288.1736        | 558.3134       | 279.6603         | 557.3293       | 279.1683         | 5  |
| 12 | 1295.6842 | 648.3457        | 1278.6576       | 639.8324         | 1277.6736        | 639.3404         | L    | <b>488.3079</b>  | 244.6576        | 471.2813       | 236.1443         | 470.2973       | 235.6523         | 4  |
| 13 | 1410.7111 | 705.8592        | 1393.6846       | 697.3459         | <b>1392.7005</b> | 696.8539         | D    | <b>375.2238</b>  | 188.1155        | 358.1973       | 179.6023         | 357.2132       | 179.1103         | 3  |
| 14 | 1523.7952 | 762.4012        | 1506.7686       | 753.8879         | 1505.7846        | 753.3959         | I    | <b>260.1969</b>  | 130.6021        | 243.1703       | 122.0888         |                |                  | 2  |
| 15 |           |                 |                 |                  |                  |                  | K    | <b>147.1128</b>  | 74.0600         | 130.0863       | 65.5468          |                |                  | 1  |

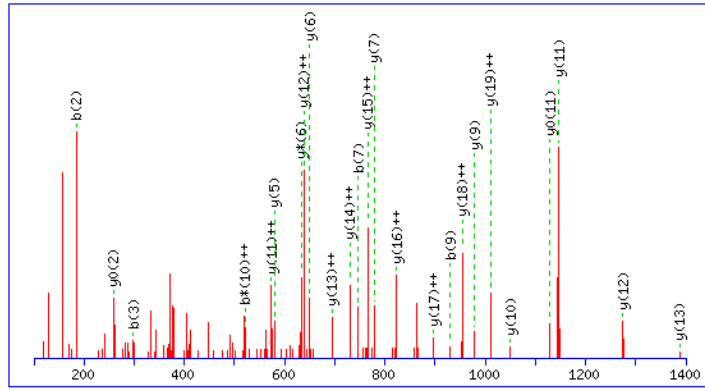

Monoisotopic mass of neutral peptide Mr(calc): 2203.2001  
 Ions Score: 61 Expect: 0.0087  
 Matches (Bold Red): 25/214 fragment ions using 47 most intense peaks

| #  | b               | b <sup>++</sup> | b <sup>*</sup> | b <sup>+++</sup> | b <sup>0</sup> | b <sup>0++</sup> | Seq. | y                | y <sup>++</sup>  | y <sup>*</sup>  | y <sup>+++</sup> | y <sup>0</sup>   | y <sup>0++</sup> | #  |
|----|-----------------|-----------------|----------------|------------------|----------------|------------------|------|------------------|------------------|-----------------|------------------|------------------|------------------|----|
| 1  | 72.0444         | 36.5258         |                |                  |                |                  | A    |                  |                  |                 |                  |                  |                  | 21 |
| 2  | <b>185.1285</b> | 93.0679         |                |                  |                |                  | L    | 2133.1703        | 1067.0888        | 2116.1437       | 1058.5755        | 2115.1597        | 1058.0835        | 20 |
| 3  | <b>298.2125</b> | 149.6099        |                |                  |                |                  | I    | 2020.0862        | <b>1010.5467</b> | 2003.0597       | 1002.0335        | 2002.0756        | 1001.5415        | 19 |
| 4  | 413.2395        | 207.1234        |                |                  | 395.2289       | 198.1181         | D    | 1907.0021        | <b>954.0047</b>  | 1889.9756       | 945.4914         | 1888.9916        | 944.9994         | 18 |
| 5  | 560.3079        | 280.6576        |                |                  | 542.2973       | 271.6523         | F    | 1791.9752        | <b>896.4912</b>  | 1774.9486       | 887.9780         | 1773.9646        | 887.4860         | 17 |
| 6  | 675.3348        | 338.1710        |                |                  | 657.3243       | 329.1658         | D    | 1644.9068        | <b>822.9570</b>  | 1627.8802       | 814.4438         | 1626.8962        | 813.9517         | 16 |
| 7  | <b>746.3719</b> | 373.6896        |                |                  | 728.3614       | 364.6843         | A    | 1529.8798        | <b>765.4436</b>  | 1512.8533       | 756.9303         | 1511.8693        | 756.4383         | 15 |
| 8  | 817.4090        | 409.2082        |                |                  | 799.3985       | 400.2029         | A    | 1458.8427        | <b>729.9250</b>  | 1441.8162       | 721.4117         | 1440.8322        | 720.9197         | 14 |
| 9  | <b>930.4931</b> | 465.7502        |                |                  | 912.4825       | 456.7449         | L    | <b>1387.8056</b> | <b>694.4064</b>  | 1370.7791       | 685.8932         | 1369.7950        | 685.4012         | 13 |
| 10 | 1058.5881       | 529.7977        | 1041.5615      | <b>521.2844</b>  | 1040.5775      | 520.7924         | K    | <b>1274.7215</b> | <b>637.8644</b>  | 1257.6950       | 629.3511         | 1256.7110        | 628.8591         | 12 |
| 11 | 1155.6408       | 578.3241        | 1138.6143      | 569.8108         | 1137.6303      | 569.3188         | P    | <b>1146.6266</b> | <b>573.8169</b>  | 1129.6000       | 565.3037         | <b>1128.6160</b> | 564.8116         | 11 |
| 12 | 1226.6780       | 613.8426        | 1209.6514      | 605.3293         | 1208.6674      | 604.8373         | A    | <b>1049.5738</b> | 525.2905         | 1032.5473       | 516.7773         | 1031.5633        | 516.2853         | 10 |
| 13 | 1339.7620       | 670.3846        | 1322.7355      | 661.8714         | 1321.7514      | 661.3794         | L    | <b>978.5367</b>  | 489.7720         | 961.5102        | 481.2587         | 960.5261         | 480.7667         | 9  |
| 14 | 1426.7940       | 713.9007        | 1409.7675      | 705.3874         | 1408.7835      | 704.8954         | S    | 865.4526         | 433.2300         | 848.4261        | 424.7167         | 847.4421         | 424.2247         | 8  |
| 15 | 1554.8526       | 777.9299        | 1537.8261      | 769.4167         | 1536.8421      | 768.9247         | Q    | <b>778.4206</b>  | 389.7139         | 761.3941        | 381.2007         | 760.4101         | 380.7087         | 7  |
| 16 | 1625.8897       | 813.4485        | 1608.8632      | 804.9352         | 1607.8792      | 804.4432         | A    | <b>650.3620</b>  | 325.6847         | <b>633.3355</b> | 317.1714         | 632.3515         | 316.6794         | 6  |
| 17 | 1682.9112       | 841.9592        | 1665.8847      | 833.4460         | 1664.9006      | 832.9540         | G    | <b>579.3249</b>  | 290.1661         | 562.2984        | 281.6528         | 561.3144         | 281.1608         | 5  |
| 18 | 1829.9796       | 915.4934        | 1812.9531      | 906.9802         | 1811.9690      | 906.4882         | F    | 522.3035         | 261.6554         | 505.2769        | 253.1421         | 504.2929         | 252.6501         | 4  |
| 19 | 1929.0480       | 965.0277        | 1912.0215      | 956.5144         | 1911.0375      | 956.0224         | V    | 375.2350         | 188.1212         | 358.2085        | 179.6079         | 357.2245         | 179.1159         | 3  |
| 20 | 2030.0957       | 1015.5515       | 2013.0692      | 1007.0382        | 2012.0851      | 1006.5462        | T    | 276.1666         | 138.5870         | 259.1401        | 130.0737         | <b>258.1561</b>  | 129.5817         | 2  |
| 21 |                 |                 |                |                  |                |                  | R    | 175.1190         | 88.0631          | 158.0924        | 79.5498          |                  |                  | 1  |

# Protein band 17 (+Mn): 50S ribosomal protein L20

Score: 178

M<sub>r</sub>: 13664

Variable modifications: Carbamidomethyl (C), Oxidation (M)  
 Cleavage by Trypsin: cuts C-term side of KR unless next residue is P  
 Sequence Coverage: 21%

Matched peptides shown in **Bold Red**

1 MPRV<sup>K</sup>RGVTA RARHQKIFAL AKGYRGR<sup>R</sup>RKN VYRVAKQAVM KAGQYAYRDR  
 51 RQRKRQFRQL WIVRINAGTR ENGLSYSKFM NGLKRASIEI DRKVLADLAV  
 101 **FDKAAFAQLV** EKAKAALAA

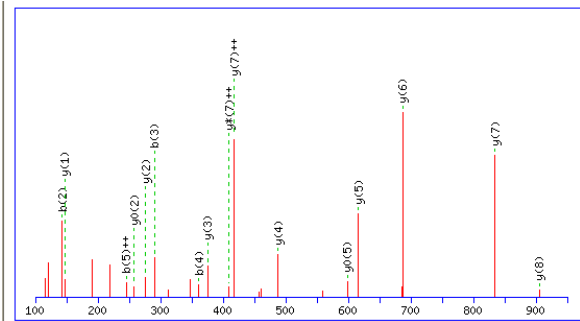

Monoisotopic mass of neutral peptide Mr(calc): 975.5389  
 Ions Score: 62 Expect: 0.013  
 Matches (**Bold Red**): 16/72 fragment ions using 27 most intense peaks

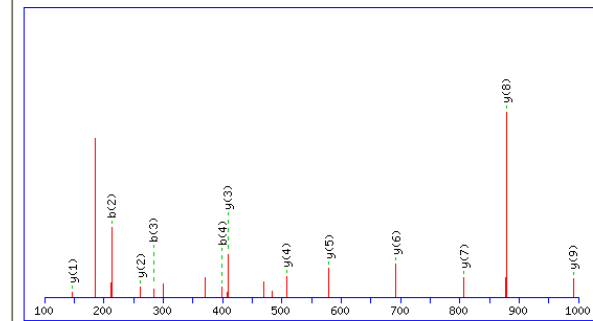

Monoisotopic mass of neutral peptide Mr(calc): 1089.6070  
 Ions Score: 77 Expect: 0.0004  
 Matches (**Bold Red**): 12/82 fragment ions using 21 most intense peaks

| # | b               | b <sup>++</sup> | b <sup>*</sup> | b <sup>+++</sup> | b <sup>0</sup> | b <sup>0++</sup> | Seq. | y               | y <sup>++</sup> | y <sup>*</sup> | y <sup>+++</sup> | y <sup>0</sup>  | y <sup>0++</sup> | # |
|---|-----------------|-----------------|----------------|------------------|----------------|------------------|------|-----------------|-----------------|----------------|------------------|-----------------|------------------|---|
| 1 | 72.0444         | 36.5258         |                |                  |                |                  | A    |                 |                 |                |                  |                 |                  | 9 |
| 2 | <b>143.0815</b> | 72.0444         |                |                  |                |                  | A    | <b>905.5091</b> | 453.2582        | 888.4825       | 444.7449         | 887.4985        | 444.2529         | 8 |
| 3 | <b>290.1499</b> | 145.5786        |                |                  |                |                  | F    | <b>834.4720</b> | <b>417.7396</b> | 817.4454       | <b>409.2264</b>  | 816.4614        | 408.7343         | 7 |
| 4 | <b>361.1870</b> | 181.0972        |                |                  |                |                  | A    | <b>687.4036</b> | 344.2054        | 670.3770       | 335.6921         | 669.3930        | 335.2001         | 6 |
| 5 | 489.2456        | <b>245.1264</b> | 472.2191       | 236.6132         |                |                  | Q    | <b>616.3665</b> | 308.6869        | 599.3399       | 300.1736         | <b>598.3559</b> | 299.6816         | 5 |
| 6 | 602.3297        | 301.6685        | 585.3031       | 293.1552         |                |                  | L    | <b>488.3079</b> | 244.6576        | 471.2813       | 236.1443         | 470.2973        | 235.6523         | 4 |
| 7 | 701.3981        | 351.2027        | 684.3715       | 342.6894         |                |                  | V    | <b>375.2238</b> | 188.1155        | 358.1973       | 179.6023         | 357.2132        | 179.1103         | 3 |
| 8 | 830.4407        | 415.7240        | 813.4141       | 407.2107         | 812.4301       | 406.7187         | E    | <b>276.1554</b> | 138.5813        | 259.1288       | 130.0681         | <b>258.1448</b> | 129.5761         | 2 |
| 9 |                 |                 |                |                  |                |                  | K    | <b>147.1128</b> | 74.0600         | 130.0863       | 65.5468          |                 |                  | 1 |

| #  | b               | b <sup>++</sup> | b <sup>0</sup> | b <sup>0++</sup> | Seq. | y               | y <sup>++</sup> | y <sup>*</sup> | y <sup>+++</sup> | y <sup>0</sup> | y <sup>0++</sup> | #  |
|----|-----------------|-----------------|----------------|------------------|------|-----------------|-----------------|----------------|------------------|----------------|------------------|----|
| 1  | 100.0757        | 50.5415         |                |                  | V    |                 |                 |                |                  |                |                  | 10 |
| 2  | <b>213.1598</b> | 107.0835        |                |                  | L    | <b>991.5459</b> | 496.2766        | 974.5193       | 487.7633         | 973.5353       | 487.2713         | 9  |
| 3  | <b>284.1969</b> | 142.6021        |                |                  | A    | <b>878.4618</b> | 439.7345        | 861.4353       | 431.2213         | 860.4512       | 430.7293         | 8  |
| 4  | <b>399.2238</b> | 200.1155        | 381.2132       | 191.1103         | D    | <b>807.4247</b> | 404.2160        | 790.3981       | 395.7027         | 789.4141       | 395.2107         | 7  |
| 5  | 512.3079        | 256.6576        | 494.2973       | 247.6523         | L    | <b>692.3978</b> | 346.7025        | 675.3712       | 338.1892         | 674.3872       | 337.6972         | 6  |
| 6  | 583.3450        | 292.1761        | 565.3344       | 283.1709         | A    | <b>579.3137</b> | 290.1605        | 562.2871       | 281.6472         | 561.3031       | 281.1552         | 5  |
| 7  | 682.4134        | 341.7103        | 664.4028       | 332.7051         | V    | <b>508.2766</b> | 254.6419        | 491.2500       | 246.1287         | 490.2660       | 245.6366         | 4  |
| 8  | 829.4818        | 415.2445        | 811.4713       | 406.2393         | F    | <b>409.2082</b> | 205.1077        | 392.1816       | 196.5944         | 391.1976       | 196.1024         | 3  |
| 9  | 944.5088        | 472.7580        | 926.4982       | 463.7527         | D    | <b>262.1397</b> | 131.5735        | 245.1132       | 123.0602         | 244.1292       | 122.5682         | 2  |
| 10 |                 |                 |                |                  | K    | <b>147.1128</b> | 74.0600         | 130.0863       | 65.5468          |                |                  | 1  |



# Protein band 17 (+Mn): 50S ribosomal protein L11

Variable modifications: Carbamidomethyl (C), Oxidation (M)  
 Cleavage by Trypsin: cuts C-term side of KR unless next residue is P  
 Sequence Coverage: 21%

Matched peptides shown in **Bold Red**

1 MAKKIIGYIK LQIPAGKANP SPPVGPALGQ RGLNIMEFCK AFNAATQGM**E**  
 51 SGLPIPVVIT AFADK**SFTFV** MKTIPPASILL KKAAGLQKGS SNPLTNKVGK  
 101 LTRAQ**LEEIA** K**TK**EPDLTAA DLDAAVRTIA GSARSMGLDV EGVV

Score: 143

M<sub>r</sub>: 14942

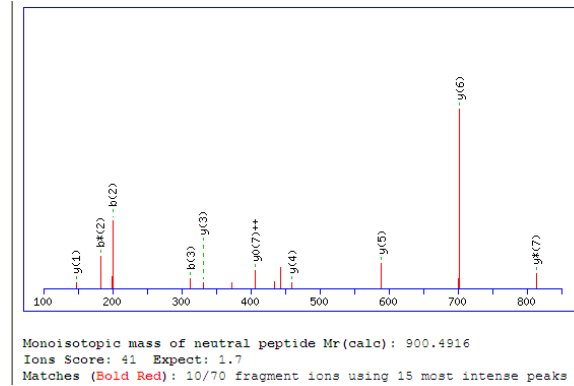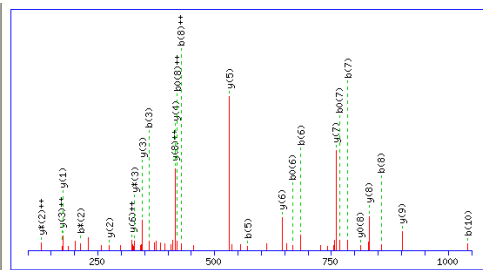

| # | b               | b <sup>++</sup> | b <sup>*</sup>  | b <sup>+++</sup> | b <sup>0</sup> | b <sup>0++</sup> | Seq. | y               | y <sup>++</sup> | y <sup>*</sup>  | y <sup>+++</sup> | y <sup>0</sup> | y <sup>0++</sup> | # |
|---|-----------------|-----------------|-----------------|------------------|----------------|------------------|------|-----------------|-----------------|-----------------|------------------|----------------|------------------|---|
| 1 | 72.0444         | 36.5258         |                 |                  |                |                  | A    |                 |                 |                 |                  |                |                  | 8 |
| 2 | <b>200.1030</b> | 100.5551        | <b>183.0764</b> | 92.0418          |                |                  | Q    | 830.4618        | 415.7345        | <b>813.4353</b> | 407.2213         | 812.4512       | <b>406.7293</b>  | 7 |
| 3 | <b>313.1870</b> | 157.0972        | 296.1605        | 148.5839         |                |                  | L    | <b>702.4032</b> | 351.7053        | 685.3767        | 343.1920         | 684.3927       | 342.7000         | 6 |
| 4 | 442.2296        | 221.6185        | 425.2031        | 213.1052         | 424.2191       | 212.6132         | E    | <b>589.3192</b> | 295.1632        | 572.2926        | 286.6499         | 571.3086       | 286.1579         | 5 |
| 5 | 571.2722        | 286.1397        | 554.2457        | 277.6265         | 553.2617       | 277.1345         | E    | <b>460.2766</b> | 230.6419        | 443.2500        | 222.1287         | 442.2660       | 221.6366         | 4 |
| 6 | 684.3563        | 342.6818        | 667.3297        | 334.1685         | 666.3457       | 333.6765         | I    | <b>331.2340</b> | 166.1206        | 314.2074        | 157.6074         |                |                  | 3 |
| 7 | 755.3934        | 378.2003        | 738.3668        | 369.6871         | 737.3828       | 369.1951         | A    | 218.1499        | 109.5786        | 201.1234        | 101.0653         |                |                  | 2 |
| 8 |                 |                 |                 |                  |                |                  | K    | <b>147.1128</b> | 74.0600         | 130.0863        | 65.5468          |                |                  | 1 |

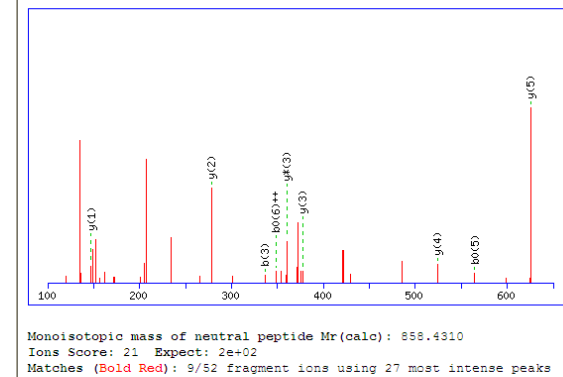

| #  | b                | b <sup>++</sup> | b <sup>*</sup>  | b <sup>+++</sup> | b <sup>0</sup>  | b <sup>0++</sup> | Seq. | y               | y <sup>++</sup> | y <sup>*</sup>  | y <sup>+++</sup> | y <sup>0</sup>  | y <sup>0++</sup> | #  |
|----|------------------|-----------------|-----------------|------------------|-----------------|------------------|------|-----------------|-----------------|-----------------|------------------|-----------------|------------------|----|
| 1  | 102.0550         | 51.5311         |                 |                  | 84.0444         | 42.5258          | T    |                 |                 |                 |                  |                 |                  | 16 |
| 2  | 230.1499         | 115.5786        | <b>213.1234</b> | 107.0653         | 212.1394        | 106.5733         | K    | 1584.8228       | 792.9150        | 1567.7962       | 784.4018         | 1566.8122       | 783.9097         | 15 |
| 3  | <b>359.1925</b>  | 180.0999        | 342.1660        | 171.5866         | 341.1819        | 171.0946         | E    | 1456.7278       | 728.8675        | 1439.7013       | 720.3543         | 1438.7172       | 719.8623         | 14 |
| 4  | 456.2453         | 228.6263        | 439.2187        | 220.1130         | 438.2347        | 219.6210         | P    | 1327.6852       | 664.3462        | 1310.6587       | 655.8330         | 1309.6747       | 655.3410         | 13 |
| 5  | <b>571.2722</b>  | 286.1397        | 554.2457        | 277.6265         | 553.2617        | 277.1345         | D    | 1230.6325       | 615.8199        | 1213.6059       | 607.3066         | 1212.6219       | 606.8146         | 12 |
| 6  | <b>684.3563</b>  | 342.6818        | 667.3297        | 334.1685         | <b>666.3457</b> | 333.6765         | L    | 1115.6055       | 558.3064        | 1098.5790       | 549.7931         | 1097.5949       | 549.3011         | 11 |
| 7  | <b>785.4040</b>  | 393.2056        | 768.3774        | 384.6923         | <b>767.3934</b> | 384.2003         | T    | 1002.5215       | 501.7644        | 985.4949        | 493.2511         | 984.5109        | 492.7591         | 10 |
| 8  | <b>856.4411</b>  | <b>428.7242</b> | 839.4145        | 420.2109         | 838.4305        | <b>419.7189</b>  | A    | <b>901.4738</b> | 451.2405        | 884.4472        | 442.7272         | 883.4632        | 442.2352         | 9  |
| 9  | 927.4782         | 464.2427        | 910.4516        | 455.7295         | 909.4676        | 455.2375         | A    | <b>830.4367</b> | <b>415.7220</b> | 813.4101        | 407.2087         | <b>812.4261</b> | 406.7167         | 8  |
| 10 | <b>1042.5051</b> | 521.7562        | 1025.4786       | 513.2429         | 1024.4946       | 512.7509         | D    | <b>759.3995</b> | 380.2034        | 742.3730        | 371.6901         | 741.3890        | 371.1981         | 7  |
| 11 | 1155.5892        | 578.2982        | 1138.5626       | 569.7850         | 1137.5786       | 569.2930         | L    | <b>644.3726</b> | <b>322.6899</b> | 627.3461        | 314.1767         | 626.3620        | 313.6847         | 6  |
| 12 | 1270.6161        | 635.8117        | 1253.5896       | 627.2984         | 1252.6056       | 626.8064         | D    | <b>531.2885</b> | 266.1479        | 514.2620        | 257.6346         | 513.2780        | 257.1426         | 5  |
| 13 | 1341.6533        | 671.3303        | 1324.6267       | 662.8170         | 1323.6427       | 662.3250         | A    | <b>416.2616</b> | 208.6344        | 399.2350        | 200.1212         |                 |                  | 4  |
| 14 | 1412.6904        | 706.8488        | 1395.6638       | 698.3355         | 1394.6798       | 697.8435         | A    | <b>345.2245</b> | <b>173.1159</b> | <b>328.1979</b> | 164.6026         |                 |                  | 3  |
| 15 | 1511.7588        | 756.3830        | 1494.7322       | 747.8698         | 1493.7482       | 747.3777         | V    | <b>274.1874</b> | 137.5973        | 257.1608        | <b>129.0840</b>  |                 |                  | 2  |
| 16 |                  |                 |                 |                  |                 |                  | R    | <b>175.1190</b> | 88.0631         | 158.0924        | 79.5498          |                 |                  | 1  |

| # | b               | b <sup>++</sup> | b <sup>0</sup>  | b <sup>0++</sup> | Seq. | y               | y <sup>++</sup> | y <sup>*</sup>  | y <sup>+++</sup> | y <sup>0</sup> | y <sup>0++</sup> | # |
|---|-----------------|-----------------|-----------------|------------------|------|-----------------|-----------------|-----------------|------------------|----------------|------------------|---|
| 1 | 88.0393         | 44.5233         | 70.0287         | 35.5180          | S    |                 |                 |                 |                  |                |                  | 7 |
| 2 | 235.1077        | 118.0575        | 217.0972        | 109.0522         | F    | 772.4062        | 386.7067        | 755.3797        | 378.1935         | 754.3956       | 377.7015         | 6 |
| 3 | <b>336.1554</b> | 168.5813        | 318.1448        | 159.5761         | T    | <b>625.3378</b> | 313.1725        | 608.3112        | 304.6593         | 607.3272       | 304.1673         | 5 |
| 4 | 483.2238        | 242.1155        | 465.2132        | 233.1103         | F    | <b>524.2901</b> | 262.6487        | 507.2636        | 254.1354         |                |                  | 4 |
| 5 | 582.2922        | 291.6498        | <b>564.2817</b> | 282.6445         | V    | <b>377.2217</b> | 189.1145        | <b>360.1952</b> | 180.6012         |                |                  | 3 |
| 6 | 713.3327        | 357.1700        | 695.3221        | <b>348.1647</b>  | M    | <b>278.1533</b> | 139.5803        | 261.1267        | 131.0670         |                |                  | 2 |
| 7 |                 |                 |                 |                  | K    | <b>147.1128</b> | 74.0600         | 130.0863        | 65.5468          |                |                  | 1 |

# Protein band 31 (+Mn): Porin IB

Score: 438

M<sub>r</sub>: 37174

Variable modifications: Carbamidomethyl (C), Oxidation (M)  
 Cleavage by Trypsin: cuts C-term side of KR unless next residue is P  
 Sequence Coverage: 35%

Matched peptides shown in **Bold Red**

1 DVTLYGA**IKA** GVQTYRSVEH IDGK**VS**KVET **GSEIAD**FGSK IGFK**Q**EDLG  
 51 NGLK**AV**WQLE QGASVAGTNT GWGN**KQ**SFVG LKGGFGT**I**RA **GSLNS**PLKNT  
 101 KDNV**NA**WESG **KFTGN**VLEIS **GMAK**REHRYL SVRYDS**P**EFA GFSGS**VQ**YAP  
 151 KDN**SG**NGES YH**VGL**NYQNS GFFA**QY**AGLF QRYGEG**T**KKI EYEH**QV**YSIP  
 201 SPSLF**VE**KLQ V**HRLV**GGYDN **NALY**SVAAQ **QQDA**KLYGAR **RANSH**NSQTE  
 251 **VAATA**AYRFG NV**IPR**VS**Y**AH GFKG**IV**DSAD HDNTY**DQ**VVV GA**EYD**FSKRT  
 301 SAL**V**SAG**WLQ** EG**KGAD**KIVS **TASAV**VL**RHK** F

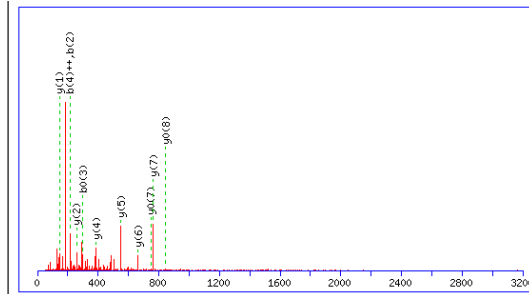

Monoisotopic mass of neutral peptide Mr(calc): 978.5386  
 Ions Score: 32 Expect: 12  
 Matches (**Bold Red**): 11/68 fragment ions using 26 most intense peaks

| # | b               | b <sup>++</sup> | b <sup>0</sup>  | b <sup>0++</sup> | Seq.     | y               | y <sup>++</sup> | y <sup>*</sup> | y <sup>+++</sup> | y <sup>0</sup>  | y <sup>0++</sup> | #        |
|---|-----------------|-----------------|-----------------|------------------|----------|-----------------|-----------------|----------------|------------------|-----------------|------------------|----------|
| 1 | 116.0342        | 58.5207         | 98.0237         | 49.5155          | <b>D</b> |                 |                 |                |                  |                 |                  | <b>9</b> |
| 2 | <b>215.1026</b> | 108.0550        | 197.0921        | 99.0497          | <b>V</b> | 864.5189        | 432.7631        | 847.4924       | 424.2498         | <b>846.5084</b> | 423.7578         | <b>8</b> |
| 3 | 316.1503        | 158.5788        | <b>298.1397</b> | 149.5735         | <b>T</b> | <b>765.4505</b> | 383.2289        | 748.4240       | 374.7156         | <b>747.4400</b> | 374.2236         | <b>7</b> |
| 4 | 429.2344        | <b>215.1208</b> | 411.2238        | 206.1155         | <b>L</b> | <b>664.4028</b> | 332.7051        | 647.3763       | 324.1918         |                 |                  | <b>6</b> |
| 5 | 592.2977        | 296.6525        | 574.2871        | 287.6472         | <b>Y</b> | <b>551.3188</b> | 276.1630        | 534.2922       | 267.6498         |                 |                  | <b>5</b> |
| 6 | 649.3192        | 325.1632        | 631.3086        | 316.1579         | <b>G</b> | <b>388.2554</b> | 194.6314        | 371.2289       | 186.1181         |                 |                  | <b>4</b> |
| 7 | 720.3563        | 360.6818        | 702.3457        | 351.6765         | <b>A</b> | 331.2340        | 166.1206        | 314.2074       | 157.6074         |                 |                  | <b>3</b> |
| 8 | 833.4403        | 417.2238        | 815.4298        | 408.2185         | <b>I</b> | <b>260.1969</b> | 130.6021        | 243.1703       | 122.0888         |                 |                  | <b>2</b> |
| 9 |                 |                 |                 |                  | <b>K</b> | <b>147.1128</b> | 74.0600         | 130.0863       | 65.5468          |                 |                  | <b>1</b> |

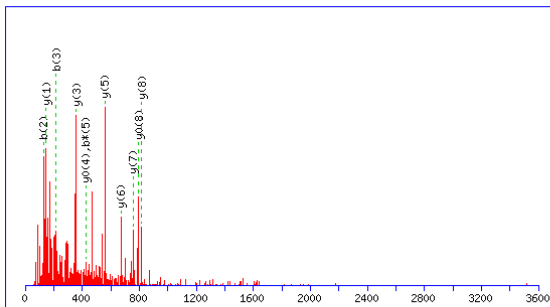

Monoisotopic mass of neutral peptide Mr(calc): 885.4920  
 Ions Score: 43 Expect: 1.1  
 Matches (**Bold Red**): 11/78 fragment ions using 69 most intense peaks

| # | b               | b <sup>++</sup> | b <sup>*</sup>  | b <sup>+++</sup> | b <sup>0</sup> | b <sup>0++</sup> | Seq.     | y               | y <sup>++</sup> | y <sup>*</sup> | y <sup>+++</sup> | y <sup>0</sup>  | y <sup>0++</sup> | #        |
|---|-----------------|-----------------|-----------------|------------------|----------------|------------------|----------|-----------------|-----------------|----------------|------------------|-----------------|------------------|----------|
| 1 | 72.0444         | 36.5258         |                 |                  |                |                  | <b>A</b> |                 |                 |                |                  |                 |                  | <b>9</b> |
| 2 | <b>129.0659</b> | 65.0366         |                 |                  |                |                  | <b>G</b> | <b>815.4621</b> | 408.2347        | 798.4356       | 399.7214         | <b>797.4516</b> | 399.2294         | <b>8</b> |
| 3 | <b>216.0979</b> | 108.5526        |                 |                  | 198.0873       | 99.5473          | <b>S</b> | <b>758.4407</b> | 379.7240        | 741.4141       | 371.2107         | 740.4301        | 370.7187         | <b>7</b> |
| 4 | 329.1819        | 165.0946        |                 |                  | 311.1714       | 156.0893         | <b>L</b> | <b>671.4087</b> | 336.2080        | 654.3821       | 327.6947         | 653.3981        | 327.2027         | <b>6</b> |
| 5 | 443.2249        | 222.1161        | <b>426.1983</b> | 213.6028         | 425.2143       | 213.1108         | <b>N</b> | <b>558.3246</b> | 279.6659        | 541.2980       | 271.1527         | 540.3140        | 270.6606         | <b>5</b> |
| 6 | 530.2569        | 265.6321        | 513.2304        | 257.1188         | 512.2463       | 256.6268         | <b>S</b> | 444.2817        | 222.6445        | 427.2551       | 214.1312         | <b>426.2711</b> | 213.6392         | <b>4</b> |
| 7 | 627.3097        | 314.1585        | 610.2831        | 305.6452         | 609.2991       | 305.1532         | <b>P</b> | <b>357.2496</b> | 179.1285        | 340.2231       | 170.6152         |                 |                  | <b>3</b> |
| 8 | 740.3937        | 370.7005        | 723.3672        | 362.1872         | 722.3832       | 361.6952         | <b>L</b> | 260.1969        | 130.6021        | 243.1703       | 122.0888         |                 |                  | <b>2</b> |
| 9 |                 |                 |                 |                  |                |                  | <b>K</b> | <b>147.1128</b> | 74.0600         | 130.0863       | 65.5468          |                 |                  | <b>1</b> |

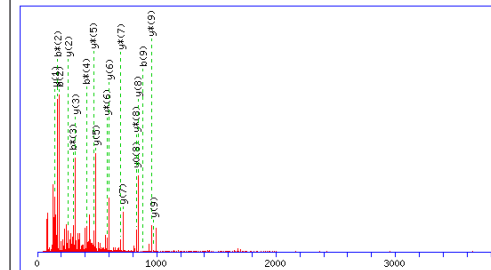

Monoisotopic mass of neutral peptide Mr(calc): 1029.5091  
 Ions Score: 51 Expect: 0.2  
 Matches (**Bold Red**): 19/90 fragment ions using 40 most intense peaks

| #  | b               | b <sup>++</sup> | b <sup>*</sup>  | b <sup>+++</sup> | b <sup>0</sup> | b <sup>0++</sup> | Seq.     | y               | y <sup>++</sup> | y <sup>*</sup>  | y <sup>+++</sup> | y <sup>0</sup>  | y <sup>0++</sup> | #         |
|----|-----------------|-----------------|-----------------|------------------|----------------|------------------|----------|-----------------|-----------------|-----------------|------------------|-----------------|------------------|-----------|
| 1  | 58.0287         | 29.5180         |                 |                  |                |                  | <b>G</b> |                 |                 |                 |                  |                 |                  | <b>10</b> |
| 2  | <b>186.0873</b> | 93.5473         | <b>169.0608</b> | 85.0340          |                |                  | <b>Q</b> | <b>973.4949</b> | 487.2511        | <b>956.4684</b> | 478.7378         | 955.4843        | 478.2458         | <b>9</b>  |
| 3  | 315.1299        | 158.0686        | <b>298.1034</b> | 149.5553         | 297.1193       | 149.0633         | <b>E</b> | <b>845.4363</b> | 423.2218        | <b>828.4098</b> | 414.7085         | <b>827.4258</b> | 414.2165         | <b>8</b>  |
| 4  | 430.1569        | 215.5821        | <b>413.1303</b> | 207.0688         | 412.1463       | 206.5768         | <b>D</b> | <b>716.3937</b> | 358.7005        | <b>699.3672</b> | 350.1872         | 698.3832        | 349.6952         | <b>7</b>  |
| 5  | 543.2409        | 272.1241        | 526.2144        | 263.6108         | 525.2304       | 263.1188         | <b>L</b> | <b>601.3668</b> | 301.1870        | <b>584.3402</b> | 292.6738         |                 |                  | <b>6</b>  |
| 6  | 600.2624        | 300.6348        | 583.2358        | 292.1216         | 582.2518       | 291.6295         | <b>G</b> | <b>488.2827</b> | 244.6450        | <b>471.2562</b> | 236.1317         |                 |                  | <b>5</b>  |
| 7  | 714.3053        | 357.6563        | 697.2788        | 349.1430         | 696.2947       | 348.6510         | <b>N</b> | 431.2613        | 216.1343        | 414.2347        | 207.6210         |                 |                  | <b>4</b>  |
| 8  | 771.3268        | 386.1670        | 754.3002        | 377.6538         | 753.3162       | 377.1617         | <b>G</b> | <b>317.2183</b> | 159.1128        | 300.1918        | 150.5995         |                 |                  | <b>3</b>  |
| 9  | <b>884.4108</b> | 442.7091        | 867.3843        | 434.1958         | 866.4003       | 433.7038         | <b>L</b> | <b>260.1969</b> | 130.6021        | 243.1703        | 122.0888         |                 |                  | <b>2</b>  |
| 10 |                 |                 |                 |                  |                |                  | <b>K</b> | <b>147.1128</b> | 74.0600         | 130.0863        | 65.5468          |                 |                  | <b>1</b>  |

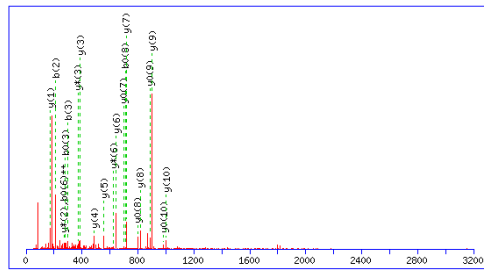

Monoisotopic mass of neutral peptide Mr(calc): 1114.6710  
 Ions Score: 73 Expect: 0.00089  
 Matches (Bold Red): 21/86 fragment ions using 49 most intense peaks

| #  | b               | b <sup>++</sup> | b <sup>0</sup>  | b <sup>0++</sup> | Seq. | y                | y <sup>++</sup> | y <sup>+</sup>  | y <sup>+++</sup> | y <sup>0</sup>  | y <sup>0++</sup> | #  |
|----|-----------------|-----------------|-----------------|------------------|------|------------------|-----------------|-----------------|------------------|-----------------|------------------|----|
| 1  | 114.0913        | 57.5493         |                 |                  | I    |                  |                 |                 |                  |                 |                  | 11 |
| 2  | <b>213.1598</b> | 107.0835        |                 |                  | V    | <b>1002.5942</b> | 501.8007        | 985.5677        | 493.2875         | <b>984.5837</b> | 492.7955         | 10 |
| 3  | <b>300.1918</b> | 150.5995        | <b>282.1812</b> | 141.5942         | S    | <b>903.5258</b>  | 452.2665        | 886.4993        | 443.7533         | <b>885.5152</b> | 443.2613         | 9  |
| 4  | 401.2395        | 201.1234        | 383.2289        | 192.1181         | T    | <b>816.4938</b>  | 408.7505        | 799.4672        | 400.2373         | <b>798.4832</b> | 399.7452         | 8  |
| 5  | 472.2766        | 236.6419        | 454.2660        | 227.6366         | A    | <b>715.4461</b>  | 358.2267        | 698.4196        | 349.7134         | <b>697.4355</b> | 349.2214         | 7  |
| 6  | <b>559.3086</b> | 280.1579        | 541.2980        | <b>271.1527</b>  | S    | <b>644.4090</b>  | 322.7081        | <b>627.3824</b> | 314.1949         | 626.3984        | 313.7028         | 6  |
| 7  | 630.3457        | 315.6765        | 612.3352        | 306.6712         | A    | <b>557.3770</b>  | 279.1921        | 540.3504        | 270.6788         |                 |                  | 5  |
| 8  | 729.4141        | 365.2107        | <b>711.4036</b> | 356.2054         | V    | <b>486.3398</b>  | 243.6736        | 469.3133        | 235.1603         |                 |                  | 4  |
| 9  | 828.4825        | 414.7449        | 810.4720        | 405.7396         | V    | <b>387.2714</b>  | 194.1394        | <b>370.2449</b> | 185.6261         |                 |                  | 3  |
| 10 | 941.5666        | 471.2869        | 923.5560        | 462.2817         | L    | 288.2030         | 144.6051        | <b>271.1765</b> | 136.0919         |                 |                  | 2  |
| 11 |                 |                 |                 |                  | R    | <b>175.1190</b>  | 88.0631         | 158.0924        | 79.5498          |                 |                  | 1  |

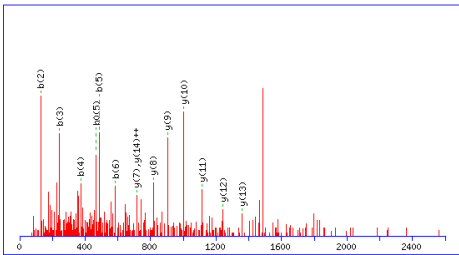

Monoisotopic mass of neutral peptide Mr(calc): 1485.8515  
 Ions Score: 59 Expect: 0.021  
 Matches (Bold Red): 14/148 fragment ions using 53 most intense peaks

| #  | b               | b <sup>++</sup> | b <sup>*</sup> | b <sup>+++</sup> | b <sup>0</sup>  | b <sup>0++</sup> | Seq. | y                | y <sup>++</sup> | y <sup>+</sup> | y <sup>+++</sup> | y <sup>0</sup> | y <sup>0++</sup> | #  |
|----|-----------------|-----------------|----------------|------------------|-----------------|------------------|------|------------------|-----------------|----------------|------------------|----------------|------------------|----|
| 1  | 58.0287         | 29.5180         |                |                  |                 |                  | G    |                  |                 |                |                  |                |                  | 15 |
| 2  | <b>129.0659</b> | 65.0366         |                |                  |                 |                  | A    | 1429.8373        | <b>715.4223</b> | 1412.8108      | 706.9090         | 1411.8267      | 706.4170         | 14 |
| 3  | <b>244.0928</b> | 122.5500        |                |                  | 226.0822        | 113.5448         | D    | <b>1358.8002</b> | 679.9037        | 1341.7736      | 671.3905         | 1340.7896      | 670.8985         | 13 |
| 4  | <b>372.1878</b> | 186.5975        | 355.1612       | 178.0842         | 354.1772        | 177.5922         | K    | <b>1243.7732</b> | 622.3903        | 1226.7467      | 613.8770         | 1225.7627      | 613.3850         | 12 |
| 5  | <b>485.2718</b> | 243.1396        | 468.2453       | 234.6263         | <b>467.2613</b> | 234.1343         | I    | <b>1115.6783</b> | 558.3428        | 1098.6517      | 549.8295         | 1097.6677      | 549.3375         | 11 |
| 6  | <b>584.3402</b> | 292.6738        | 567.3137       | 284.1605         | 566.3297        | 283.6685         | V    | <b>1002.5942</b> | 501.8007        | 985.5677       | 493.2875         | 984.5837       | 492.7955         | 10 |
| 7  | 671.3723        | 336.1898        | 654.3457       | 327.6765         | 653.3617        | 327.1845         | S    | <b>903.5258</b>  | 452.2665        | 886.4993       | 443.7533         | 885.5152       | 443.2613         | 9  |
| 8  | 772.4199        | 386.7136        | 755.3934       | 378.2003         | 754.4094        | 377.7083         | T    | <b>816.4938</b>  | 408.7505        | 799.4672       | 400.2373         | 798.4832       | 399.7452         | 8  |
| 9  | 843.4571        | 422.2322        | 826.4305       | 413.7189         | 825.4465        | 413.2269         | A    | <b>715.4461</b>  | 358.2267        | 698.4196       | 349.7134         | 697.4355       | 349.2214         | 7  |
| 10 | 930.4891        | 465.7482        | 913.4625       | 457.2349         | 912.4785        | 456.7429         | S    | 644.4090         | 322.7081        | 627.3824       | 314.1949         | 626.3984       | 313.7028         | 6  |
| 11 | 1001.5262       | 501.2667        | 984.4997       | 492.7535         | 983.5156        | 492.2615         | A    | 557.3770         | 279.1921        | 540.3504       | 270.6788         |                |                  | 5  |
| 12 | 1100.5946       | 550.8009        | 1083.5681      | 542.2877         | 1082.5840       | 541.7957         | V    | 486.3398         | 243.6736        | 469.3133       | 235.1603         |                |                  | 4  |
| 13 | 1199.6630       | 600.3352        | 1182.6365      | 591.8219         | 1181.6525       | 591.3299         | V    | 387.2714         | 194.1394        | 370.2449       | 185.6261         |                |                  | 3  |
| 14 | 1312.7471       | 656.8772        | 1295.7205      | 648.3639         | 1294.7365       | 647.8719         | L    | 288.2030         | 144.6051        | 271.1765       | 136.0919         |                |                  | 2  |
| 15 |                 |                 |                |                  |                 |                  | R    | <b>175.1190</b>  | 88.0631         | 158.0924       | 79.5498          |                |                  | 1  |

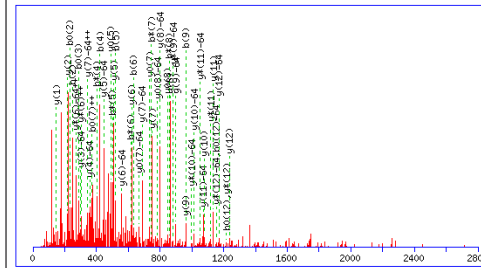

Monoisotopic mass of neutral peptide Mr(calc): 1381.6911  
 Variable modifications:  
 M1 : Oxidation (M), with neutral losses 63.9983 (shown in table), 0.0000  
 Ions Score: 62 Expect: 0.01  
 Matches (Bold Red): 49/196 fragment ions using 93 most intense peaks

| #  | b               | b <sup>++</sup> | b <sup>*</sup>  | b <sup>+++</sup> | b <sup>0</sup>   | b <sup>0++</sup> | Seq. | y                | y <sup>++</sup> | y <sup>+</sup>   | y <sup>+++</sup> | y <sup>0</sup>  | y <sup>0++</sup> | #  |
|----|-----------------|-----------------|-----------------|------------------|------------------|------------------|------|------------------|-----------------|------------------|------------------|-----------------|------------------|----|
| 1  | 148.0757        | 74.5415         |                 |                  |                  |                  | F    |                  |                 |                  |                  |                 |                  | 13 |
| 2  | <b>249.1234</b> | 125.0653        |                 |                  | <b>231.1128</b>  | 116.0600         | T    | <b>1171.6317</b> | 586.3195        | <b>1154.6052</b> | 577.8062         | 1153.6212       | 577.3142         | 12 |
| 3  | 306.1448        | 153.5761        |                 |                  | <b>288.1343</b>  | 144.5708         | G    | <b>1070.5840</b> | 535.7957        | <b>1053.5575</b> | 527.2824         | 1052.5735       | 526.7904         | 11 |
| 4  | <b>420.1878</b> | 210.5975        | <b>403.1612</b> | 202.0842         | 402.1772         | 201.5922         | N    | <b>1013.5626</b> | 507.2849        | <b>996.5360</b>  | 498.7717         | 995.5520        | 498.2796         | 10 |
| 5  | <b>519.2562</b> | 260.1317        | <b>502.2296</b> | 251.6185         | 501.2456         | 251.1264         | V    | <b>899.5197</b>  | 450.2635        | <b>882.4931</b>  | 441.7502         | 881.5091        | 441.2582         | 9  |
| 6  | <b>632.3402</b> | 316.6738        | <b>615.3137</b> | 308.1605         | 614.3297         | 307.6685         | L    | <b>800.4512</b>  | 400.7293        | 783.4247         | 392.2160         | <b>782.4407</b> | 391.7240         | 8  |
| 7  | 761.3828        | 381.1951        | <b>744.3563</b> | 372.6818         | 743.3723         | <b>372.1898</b>  | E    | <b>687.3672</b>  | <b>344.1872</b> | 670.3406         | 335.6740         | <b>669.3566</b> | 335.1819         | 7  |
| 8  | 874.4669        | 437.7371        | <b>857.4403</b> | 429.2238         | 856.4563         | 428.7318         | I    | <b>558.3246</b>  | 279.6659        | 541.2980         | <b>271.1527</b>  | 540.3140        | 270.6606         | 6  |
| 9  | <b>961.4989</b> | 481.2531        | 944.4724        | 472.7398         | 943.4884         | 472.2478         | S    | <b>445.2405</b>  | 223.1239        | 428.2140         | 214.6106         | 427.2300        | 214.1186         | 5  |
| 10 | 1018.5204       | 509.7638        | 1001.4938       | 501.2506         | 1000.5098        | 500.7585         | G    | <b>358.2085</b>  | 179.6079        | 341.1819         | 171.0946         |                 |                  | 4  |
| 11 | 1101.5575       | 551.2824        | 1084.5310       | 542.7691         | 1083.5469        | 542.2771         | M    | <b>301.1870</b>  | 151.0972        | 284.1605         | 142.5839         |                 |                  | 3  |
| 12 | 1172.5946       | 586.8009        | 1155.5681       | 578.2877         | <b>1154.5840</b> | 577.7957         | A    | <b>218.1499</b>  | 109.5786        | 201.1234         | 101.0653         |                 |                  | 2  |
| 13 |                 |                 |                 |                  |                  |                  | K    | <b>147.1128</b>  | 74.0600         | 130.0863         | 65.5468          |                 |                  | 1  |

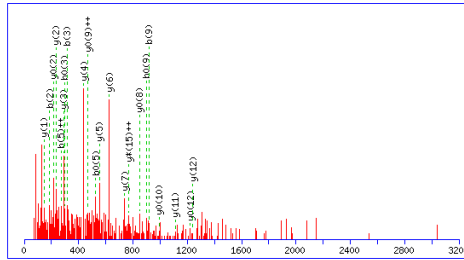

Monoisotopic mass of neutral peptide Mr(calc): 1652.8257  
 Ions Score: 25 Expect: 42  
 Matches (Bold Red): 22/172 fragment ions using 84 most intense peaks

| #  | b               | b <sup>++</sup> | b <sup>*</sup> | b <sup>+++</sup> | b <sup>0</sup>  | b <sup>0++</sup> | Seq. | y                | y <sup>++</sup> | y <sup>+</sup> | y <sup>+++</sup> | y <sup>0</sup>   | y <sup>0++</sup> | #  |
|----|-----------------|-----------------|----------------|------------------|-----------------|------------------|------|------------------|-----------------|----------------|------------------|------------------|------------------|----|
| 1  | 100.0757        | 50.5415         |                |                  |                 |                  | V    |                  |                 |                |                  |                  |                  | 16 |
| 2  | <b>187.1077</b> | 94.0575         |                |                  | 169.0972        | 85.0522          | S    | 1554.7646        | 777.8859        | 1537.7380      | <b>769.3727</b>  | 1536.7540        | 768.8807         | 15 |
| 3  | <b>315.2027</b> | 158.1050        | 298.1761       | 149.5917         | <b>297.1921</b> | 149.0997         | K    | 1467.7326        | 734.3699        | 1450.7060      | 725.8566         | 1449.7220        | 725.3646         | 14 |
| 4  | 414.2711        | 207.6392        | 397.2445       | 199.1259         | 396.2605        | 198.6339         | V    | 1339.6376        | 670.3224        | 1322.6111      | 661.8092         | 1321.6270        | 661.3172         | 13 |
| 5  | 543.3137        | <b>272.1605</b> | 526.2871       | 263.6472         | <b>525.3031</b> | 263.1552         | E    | <b>1240.5692</b> | 620.7882        | 1223.5426      | 612.2750         | <b>1222.5586</b> | 611.7829         | 12 |
| 6  | 644.3614        | 322.6843        | 627.3348       | 314.1710         | 626.3508        | 313.6790         | T    | <b>1111.5266</b> | 556.2669        | 1094.5000      | 547.7537         | 1093.5160        | 547.2617         | 11 |
| 7  | 701.3828        | 351.1951        | 684.3563       | 342.6818         | 683.3723        | 342.1898         | G    | 1010.4789        | 505.7431        | 993.4524       | 497.2298         | <b>992.4684</b>  | 496.7378         | 10 |
| 8  | 788.4149        | 394.7111        | 771.3883       | 386.1978         | 770.4043        | 385.7058         | S    | 953.4575         | 477.2324        | 936.4309       | 468.7191         | 935.4469         | <b>468.2271</b>  | 9  |
| 9  | <b>917.4575</b> | 459.2324        | 900.4309       | 450.7191         | <b>899.4469</b> | 450.2271         | E    | 866.4254         | 433.7164        | 849.3989       | 425.2031         | <b>848.4149</b>  | 424.7111         | 8  |
| 10 | 1030.5415       | 515.7744        | 1013.5150      | 507.2611         | 1012.5310       | 506.7691         | I    | <b>737.3828</b>  | 369.1951        | 720.3563       | 360.6818         | 719.3723         | 360.1898         | 7  |
| 11 | 1101.5786       | 551.2930        | 1084.5521      | 542.7797         | 1083.5681       | 542.2877         | A    | <b>624.2988</b>  | 312.6530        | 607.2722       | 304.1397         | 606.2882         | 303.6477         | 6  |
| 12 | 1216.6056       | 608.8064        | 1199.5790      | 600.2932         | 1198.5950       | 600.2932         | D    | <b>553.2617</b>  | 277.1345        | 536.2351       | 268.6212         | 535.2511         | 268.1292         | 5  |
| 13 | 1363.6740       | 682.3406        | 1346.6734      | 673.8274         | 1345.6634       | 673.3353         | F    | <b>438.2347</b>  | 219.6210        | 421.2082       | 211.1077         | 420.2241         | 210.6157         | 4  |
| 14 | 1420.6955       | 710.8514        | 1403.6689      | 702.3381         | 1402.6849       | 701.8461         | G    | <b>291.1663</b>  | 146.0868        | 274.1397       | 137.5735         | 273.1557         | 137.0815         | 3  |
| 15 | 1507.7275       | 754.3674        | 1490.7009      | 745.8541         | 1489.7169       | 745.3621         | S    | <b>234.1448</b>  | 117.5761        | 217.1183       | 109.0628         | <b>216.1343</b>  | 108.5708         | 2  |
| 16 |                 |                 |                |                  |                 |                  | K    | <b>147.1128</b>  | 74.0600         | 130.0863       | 65.5468          |                  |                  | 1  |

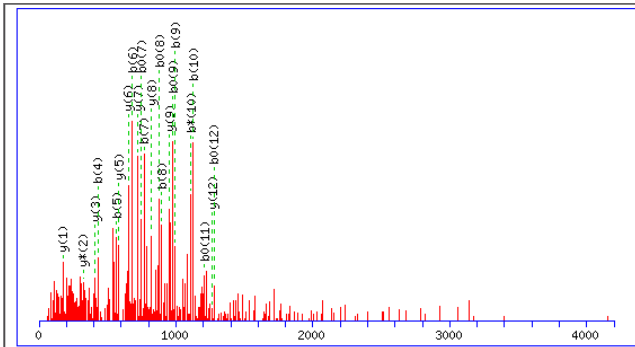

Monoisotopic mass of neutral peptide Mr(calc): 1945.9354  
 Ions Score: 37 Expect: 2.6  
 Matches (Bold Red): 22/190 fragment ions using 81 most intense peaks

| #  | b                | b <sup>++</sup> | b <sup>*</sup>   | b <sup>+++</sup> | b <sup>0</sup>   | b <sup>0++</sup> | Seq. | y                | y <sup>++</sup> | y <sup>*</sup>  | y <sup>+++</sup> | y <sup>0</sup> | y <sup>0++</sup> | #  |
|----|------------------|-----------------|------------------|------------------|------------------|------------------|------|------------------|-----------------|-----------------|------------------|----------------|------------------|----|
| 1  | 157.1084         | 79.0578         | 140.0818         | 70.5446          |                  |                  | R    |                  |                 |                 |                  |                |                  | 18 |
| 2  | 228.1455         | 114.5764        | 211.1190         | 106.0631         |                  |                  | A    | 1790.8416        | 895.9244        | 1773.8151       | 887.4112         | 1772.8311      | 886.9192         | 17 |
| 3  | 342.1884         | 171.5979        | 325.1619         | 163.0846         |                  |                  | N    | 1719.8045        | 860.4059        | 1702.7780       | 851.8926         | 1701.7939      | 851.4006         | 16 |
| 4  | <b>429.2205</b>  | 215.1139        | 412.1939         | 206.6006         | 411.2099         | 206.1086         | S    | 1605.7616        | 803.3844        | 1588.7350       | 794.8712         | 1587.7510      | 794.3791         | 15 |
| 5  | <b>566.2794</b>  | 283.6433        | 549.2528         | 275.1300         | 548.2688         | 274.6380         | H    | 1518.7295        | 759.8684        | 1501.7030       | 751.3551         | 1500.7190      | 750.8631         | 14 |
| 6  | <b>680.3223</b>  | 340.6648        | 663.2957         | 332.1515         | 662.3117         | 331.6595         | N    | 1381.6706        | 691.3390        | 1364.6441       | 682.8257         | 1363.6601      | 682.3337         | 13 |
| 7  | <b>767.3543</b>  | 384.1808        | 750.3278         | 375.6675         | <b>749.3438</b>  | 375.1755         | S    | <b>1267.6277</b> | 634.3175        | 1250.6012       | 625.8042         | 1249.6171      | 625.3122         | 12 |
| 8  | <b>895.4129</b>  | 448.2101        | 878.3864         | 439.6968         | <b>877.4023</b>  | 439.2048         | Q    | 1180.5957        | 590.8015        | 1163.5691       | 582.2882         | 1162.5851      | 581.7962         | 11 |
| 9  | <b>996.4606</b>  | 498.7339        | 979.4340         | 490.2207         | <b>978.4500</b>  | 489.7286         | T    | 1052.5371        | 526.7722        | 1035.5106       | 518.2589         | 1034.5265      | 517.7669         | 10 |
| 10 | <b>1125.5032</b> | 563.2552        | <b>1108.4766</b> | 554.7419         | 1107.4926        | 554.2499         | E    | <b>951.4894</b>  | 476.2483        | 934.4629        | 467.7351         | 933.4789       | 467.2431         | 9  |
| 11 | 1224.5716        | 612.7894        | 1207.5450        | 604.2762         | <b>1206.5610</b> | 603.7841         | V    | <b>822.4468</b>  | 411.7271        | 805.4203        | 403.2138         | 804.4363       | 402.7218         | 8  |
| 12 | 1295.6087        | 648.3080        | 1278.5822        | 639.7947         | <b>1277.5981</b> | 639.3027         | A    | <b>723.3784</b>  | 362.1928        | 706.3519        | 353.6796         | 705.3679       | 353.1876         | 7  |
| 13 | 1366.6458        | 683.8265        | 1349.6193        | 675.3133         | 1348.6352        | 674.8213         | A    | <b>652.3413</b>  | 326.6743        | 635.3148        | 318.1610         | 634.3307       | 317.6690         | 6  |
| 14 | 1467.6935        | 734.3504        | 1450.6669        | 725.8371         | 1449.6829        | 725.3451         | T    | <b>581.3042</b>  | 291.1557        | 564.2776        | 282.6425         | 563.2936       | 282.1504         | 5  |
| 15 | 1538.7306        | 769.8689        | 1521.7041        | 761.3557         | 1520.7200        | 760.8637         | A    | 480.2565         | 240.6319        | 463.2300        | 232.1186         |                |                  | 4  |
| 16 | 1609.7677        | 805.3875        | 1592.7412        | 796.8742         | 1591.7572        | 796.3822         | A    | <b>409.2194</b>  | 205.1133        | 392.1928        | 196.6001         |                |                  | 3  |
| 17 | 1772.8311        | 886.9192        | 1755.8045        | 878.4059         | 1754.8205        | 877.9139         | Y    | 338.1823         | 169.5948        | <b>321.1557</b> | 161.0815         |                |                  | 2  |
| 18 |                  |                 |                  |                  |                  |                  | R    | <b>175.1190</b>  | 88.0631         | 158.0924        | 79.5498          |                |                  | 1  |

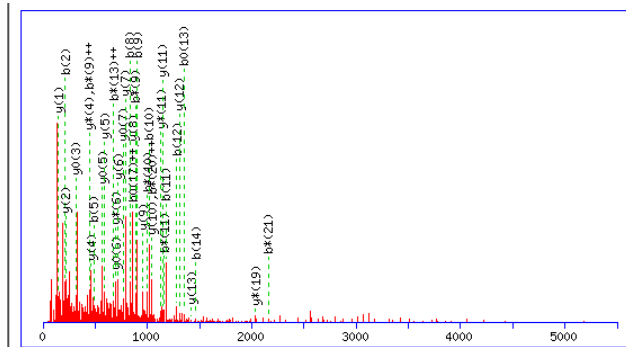

Monoisotopic mass of neutral peptide Mr(calc): 2323.1444  
 Ions Score: 45 Expect: 0.36  
 Matches (Bold Red): 37/226 fragment ions using 115 most intense peaks

| #  | b                | b <sup>++</sup> | b <sup>*</sup>   | b <sup>+++</sup> | b <sup>0</sup>   | b <sup>0++</sup> | Seq. | y                | y <sup>++</sup> | y <sup>*</sup>   | y <sup>+++</sup> | y <sup>0</sup>  | y <sup>0++</sup> | #  |
|----|------------------|-----------------|------------------|------------------|------------------|------------------|------|------------------|-----------------|------------------|------------------|-----------------|------------------|----|
| 1  | 114.0913         | 57.5493         |                  |                  |                  |                  | L    |                  |                 |                  |                  |                 |                  | 22 |
| 2  | <b>213.1598</b>  | 107.0835        |                  |                  |                  |                  | V    | 2211.0677        | 1106.0375       | 2194.0411        | 1097.5242        | 2193.0571       | 1097.0322        | 21 |
| 3  | 270.1812         | 135.5942        |                  |                  |                  |                  | G    | 2111.9992        | 1056.5033       | 2094.9727        | 1047.9900        | 2093.9887       | 1047.4980        | 20 |
| 4  | 327.2027         | 164.1050        |                  |                  |                  |                  | G    | 2054.9778        | 1027.9925       | <b>2037.9512</b> | 1019.4793        | 2036.9672       | 1018.9872        | 19 |
| 5  | <b>490.2660</b>  | 245.6366        |                  |                  |                  |                  | Y    | 1997.9563        | 999.4818        | 1980.9298        | 990.9685         | 1979.9457       | 990.4765         | 18 |
| 6  | 605.2930         | 303.1501        |                  |                  | 587.2824         | 294.1448         | D    | 1834.8930        | 917.9501        | 1817.8664        | 909.4369         | 1816.8824       | 908.9448         | 17 |
| 7  | 719.3359         | 360.1716        | 702.3093         | 351.6583         | 701.3253         | 351.1663         | N    | 1719.8660        | 860.4367        | 1702.8395        | 851.9234         | 1701.8555       | 851.4314         | 16 |
| 8  | <b>833.3788</b>  | 417.1930        | 816.3523         | 408.6798         | 815.3682         | 408.1878         | N    | 1605.8231        | 803.4152        | 1588.7966        | 794.9019         | 1587.8125       | 794.4099         | 15 |
| 9  | <b>904.4159</b>  | 452.7116        | <b>887.3894</b>  | <b>444.1983</b>  | 886.4054         | 443.7063         | A    | 1491.7802        | 746.3937        | 1474.7536        | 737.8805         | 1473.7696       | 737.3884         | 14 |
| 10 | <b>1017.5000</b> | 509.2536        | <b>1000.4734</b> | 500.7404         | 999.4894         | 500.2483         | L    | <b>1420.7431</b> | 710.8752        | 1403.7165        | 702.3619         | 1402.7325       | 701.8699         | 13 |
| 11 | <b>1180.5633</b> | 590.7853        | <b>1163.5368</b> | 582.2720         | 1162.5527        | 581.7800         | Y    | <b>1307.6590</b> | 654.3331        | 1290.6325        | 645.8199         | 1289.6484       | 645.3279         | 12 |
| 12 | <b>1279.6317</b> | 640.3195        | 1262.6052        | 631.8062         | 1261.6212        | 631.3142         | V    | <b>1144.5957</b> | 572.8015        | <b>1127.5691</b> | 564.2882         | 1126.5851       | 563.7962         | 11 |
| 13 | 1366.6638        | 683.8355        | 1349.6372        | <b>675.3222</b>  | <b>1348.6532</b> | 674.8302         | S    | <b>1045.5273</b> | 523.2673        | 1028.5007        | 514.7540         | 1027.5167       | 514.2620         | 10 |
| 14 | <b>1465.7322</b> | 733.3697        | 1448.7056        | 724.8564         | 1447.7216        | 724.3644         | V    | <b>958.4952</b>  | 479.7513        | 941.4687         | 471.2380         | 940.4847        | 470.7460         | 9  |
| 15 | 1536.7693        | 768.8883        | 1519.7427        | 760.3750         | 1518.7587        | 759.8830         | A    | <b>859.4268</b>  | 430.2170        | 842.4003         | 421.7038         | 841.4163        | 421.2118         | 8  |
| 16 | 1607.8064        | 804.4068        | 1590.7799        | 795.8936         | 1589.7958        | 795.4016         | A    | <b>788.3897</b>  | 394.6985        | 771.3632         | 386.1852         | <b>770.3791</b> | 385.6932         | 7  |
| 17 | 1735.8650        | 868.4361        | 1718.8384        | 859.9229         | 1717.8544        | <b>859.4308</b>  | Q    | <b>717.3526</b>  | 359.1799        | <b>700.3260</b>  | 350.6667         | <b>699.3420</b> | 350.1747         | 6  |
| 18 | 1863.9236        | 932.4654        | 1846.8970        | 923.9521         | 1845.9130        | 923.4601         | Q    | <b>589.2940</b>  | 295.1506        | 572.2675         | 286.6374         | <b>571.2835</b> | 286.1454         | 5  |
| 19 | 1991.9821        | 996.4947        | 1974.9556        | 987.9814         | 1973.9716        | 987.4894         | Q    | <b>461.2354</b>  | 231.1214        | <b>444.2089</b>  | 222.6081         | 443.2249        | 222.1161         | 4  |
| 20 | 2107.0091        | 1054.0082       | 2089.9825        | <b>1045.4949</b> | 2088.9985        | 1045.0029        | D    | 333.1769         | 167.0921        | 316.1503         | 158.5788         | <b>315.1663</b> | 158.0868         | 3  |
| 21 | 2178.0462        | 1089.5267       | <b>2161.0196</b> | 1081.0135        | 2160.0356        | 1080.5215        | A    | <b>218.1499</b>  | 109.5786        | 201.1234         | 101.0653         |                 |                  | 2  |
| 22 |                  |                 |                  |                  |                  |                  | K    | <b>147.1128</b>  | 74.0600         | 130.0863         | 65.5468          |                 |                  | 1  |

# Protein band 39 (+Mn): Iron-superoxide dismutase

Score: 72

M<sub>r</sub>: 17395

Variable modifications: Carbamidomethyl (C), Oxidation (M)  
 Cleavage by Trypsin: cuts C-term side of KR unless next residue is P  
 Sequence Coverage: 22%

Matched peptides shown in **Bold Red**

1 YHHGKHHQTY ITNLNNQIKG **TEFENLPLEE** **IVKKSSGGVF** NNAAQIWNHT  
 51 FYWLGFTPKG **QGKPAGE**LAA AIDAKWGSFE KFQEAFNACA AGTFGSGWAW  
 101 LVKTPVGGLD LISTSNAAFP LTTENTPLLT CDVWEHAYY

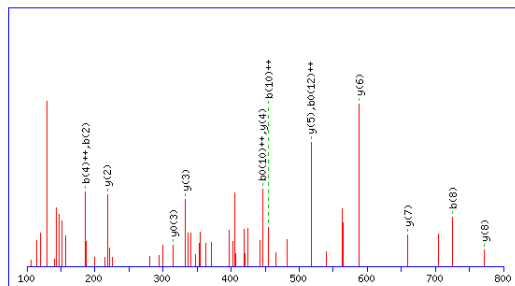

Monoisotopic mass of neutral peptide Mr(calc): 1495.7994  
 Ions Score: 51 Expect: 0.12  
 Matches (**Bold Red**): 14/160 fragment ions using 16 most intense peaks

| #  | b               | b <sup>++</sup> | b <sup>*</sup> | b <sup>+++</sup> | b <sup>0</sup> | b <sup>0++</sup> | Seq. | y               | y <sup>++</sup> | y <sup>*</sup> | y <sup>+++</sup> | y <sup>0</sup>  | y <sup>0++</sup> | #  |
|----|-----------------|-----------------|----------------|------------------|----------------|------------------|------|-----------------|-----------------|----------------|------------------|-----------------|------------------|----|
| 1  | 58.0287         | 29.5180         |                |                  |                |                  | G    |                 |                 |                |                  |                 |                  | 16 |
| 2  | <b>186.0873</b> | 93.5473         | 169.0608       | 85.0340          |                |                  | Q    | 1439.7853       | 720.3963        | 1422.7587      | 711.8830         | 1421.7747       | 711.3910         | 15 |
| 3  | 243.1088        | 122.0580        | 226.0822       | 113.5448         |                |                  | G    | 1311.7267       | 656.3670        | 1294.7001      | 647.8537         | 1293.7161       | 647.3617         | 14 |
| 4  | 371.2037        | <b>186.1055</b> | 354.1772       | 177.5922         |                |                  | K    | 1254.7052       | 627.8563        | 1237.6787      | 619.3430         | 1236.6947       | 618.8510         | 13 |
| 5  | 468.2565        | 234.6319        | 451.2300       | 226.1186         |                |                  | P    | 1126.6103       | 563.8088        | 1109.5837      | 555.2955         | 1108.5997       | 554.8035         | 12 |
| 6  | 539.2936        | 270.1504        | 522.2671       | 261.6372         |                |                  | A    | 1029.5575       | 515.2824        | 1012.5310      | 506.7691         | 1011.5469       | 506.2771         | 11 |
| 7  | 596.3151        | 298.6612        | 579.2885       | 290.1479         |                |                  | G    | 958.5204        | 479.7638        | 941.4938       | 471.2506         | 940.5098        | 470.7585         | 10 |
| 8  | <b>725.3577</b> | 363.1825        | 708.3311       | 354.6692         | 707.3471       | 354.1772         | E    | 901.4989        | 451.2531        | 884.4724       | 442.7398         | 883.4884        | 442.2478         | 9  |
| 9  | 838.4417        | 419.7245        | 821.4152       | 411.2112         | 820.4312       | 410.7192         | L    | <b>772.4563</b> | 386.7318        | 755.4298       | 378.2185         | 754.4458        | 377.7265         | 8  |
| 10 | 909.4789        | <b>455.2431</b> | 892.4523       | 446.7298         | 891.4683       | <b>446.2378</b>  | A    | <b>659.3723</b> | 330.1898        | 642.3457       | 321.6765         | 641.3617        | 321.1845         | 7  |
| 11 | 980.5160        | 490.7616        | 963.4894       | 482.2483         | 962.5054       | 481.7563         | A    | <b>588.3352</b> | 294.6712        | 571.3086       | 286.1579         | 570.3246        | 285.6659         | 6  |
| 12 | 1051.5531       | 526.2802        | 1034.5265      | 517.7669         | 1033.5425      | <b>517.2749</b>  | A    | <b>517.2980</b> | 259.1527        | 500.2715       | 250.6394         | 499.2875        | 250.1474         | 5  |
| 13 | 1164.6372       | 582.8222        | 1147.6106      | 574.3089         | 1146.6266      | 573.8169         | I    | <b>446.2609</b> | 223.6341        | 429.2344       | 215.1208         | 428.2504        | 214.6288         | 4  |
| 14 | 1279.6641       | 640.3357        | 1262.6375      | 631.8224         | 1261.6535      | 631.3304         | D    | <b>333.1769</b> | 167.0921        | 316.1503       | 158.5788         | <b>315.1663</b> | 158.0868         | 3  |
| 15 | 1350.7012       | 675.8542        | 1333.6747      | 667.3410         | 1332.6906      | 666.8490         | A    | <b>218.1499</b> | 109.5786        | 201.1234       | 101.0653         |                 |                  | 2  |
| 16 |                 |                 |                |                  |                |                  | K    | 147.1128        | 74.0600         | 130.0863       | 65.5468          |                 |                  | 1  |

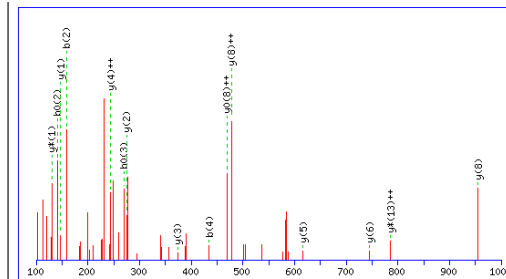

Monoisotopic mass of neutral peptide Mr(calc): 1744.9247  
 Ions Score: 22 Expect: 90  
 Matches (**Bold Red**): 15/148 fragment ions using 36 most intense peaks

| #  | b               | b <sup>++</sup> | b <sup>*</sup> | b <sup>+++</sup> | b <sup>0</sup>  | b <sup>0++</sup> | Seq. | y               | y <sup>++</sup> | y <sup>*</sup>  | y <sup>+++</sup> | y <sup>0</sup> | y <sup>0++</sup> | #  |
|----|-----------------|-----------------|----------------|------------------|-----------------|------------------|------|-----------------|-----------------|-----------------|------------------|----------------|------------------|----|
| 1  | 58.0287         | 29.5180         |                |                  |                 |                  | G    |                 |                 |                 |                  |                |                  | 15 |
| 2  | <b>159.0764</b> | 80.0418         |                |                  | <b>141.0659</b> | 71.0366          | T    | 1688.9105       | 844.9589        | 1671.8840       | 836.4456         | 1670.9000      | 835.9536         | 14 |
| 3  | 288.1190        | 144.5631        |                |                  | <b>270.1084</b> | 135.5579         | E    | 1587.8629       | 794.4351        | 1570.8363       | <b>785.9218</b>  | 1569.8523      | 785.4298         | 13 |
| 4  | <b>435.1874</b> | 218.0974        |                |                  |                 | 417.1769         | F    | 1458.8203       | 729.9138        | 1441.7937       | 721.4005         | 1440.8097      | 720.9085         | 12 |
| 5  | 564.2300        | 282.6186        |                |                  |                 | 546.2195         | E    | 1311.7518       | 656.3796        | 1294.7253       | 647.8663         | 1293.7413      | 647.3743         | 11 |
| 6  | 678.2729        | 339.6401        | 661.2464       | 331.1268         | 660.2624        | 330.6348         | N    | 1182.7093       | 591.8583        | 1165.6827       | 583.3450         | 1164.6987      | 582.8530         | 10 |
| 7  | 791.3570        | 396.1821        | 774.3305       | 387.6689         | 773.3464        | 387.1769         | L    | 1068.6663       | 534.8368        | 1051.6398       | 526.3235         | 1050.6558      | 525.8315         | 9  |
| 8  | 888.4098        | 444.7085        | 871.3832       | 436.1953         | 870.3992        | 435.7032         | P    | <b>955.5823</b> | <b>478.2948</b> | 938.5557        | 469.7815         | 937.5717       | <b>469.2895</b>  | 8  |
| 9  | 1001.4938       | 501.2506        | 984.4673       | 492.7373         | 983.4833        | 492.2453         | L    | 858.5295        | 429.7684        | 841.5029        | 421.2551         | 840.5189       | 420.7631         | 7  |
| 10 | 1130.5364       | 565.7719        | 1113.5099      | 557.2586         | 1112.5259       | 556.7666         | E    | <b>745.4454</b> | 373.2264        | 728.4189        | 364.7131         | 727.4349       | 364.2211         | 6  |
| 11 | 1259.5790       | 630.2932        | 1242.5525      | 621.7799         | 1241.5685       | 621.2879         | E    | <b>616.4028</b> | 308.7051        | 599.3763        | 300.1918         | 598.3923       | 299.6998         | 5  |
| 12 | 1372.6631       | 686.8352        | 1355.6365      | 678.3219         | 1354.6525       | 677.8299         | I    | 487.3602        | <b>244.1838</b> | 470.3337        | 235.6705         |                |                  | 4  |
| 13 | 1471.7315       | 736.3694        | 1454.7050      | 727.8561         | 1453.7209       | 727.3641         | V    | <b>374.2762</b> | 187.6417        | 357.2496        | 179.1285         |                |                  | 3  |
| 14 | 1599.8265       | 800.4169        | 1582.7999      | 791.9036         | 1581.8159       | 791.4116         | K    | <b>275.2078</b> | 138.1075        | 258.1812        | 129.5942         |                |                  | 2  |
| 15 |                 |                 |                |                  |                 |                  | K    | <b>147.1128</b> | 74.0600         | <b>130.0863</b> | 65.5468          |                |                  | 1  |



# Protein band 42 (-Mn): Pilin

Score: 62

M<sub>r</sub>: 18087

Variable modifications: Carbamidomethyl (C), Oxidation (M)  
 Cleavage by Trypsin: cuts C-term side of KR unless next residue is P  
 Sequence Coverage: 8%

Matched peptides shown in **Bold Red**

1 MNTLQKGFTL IELMIVIAIV GILAAVALPA YQDYTARAQV **SEAILLAEGQ**  
 51 **K**SAVTEYYLN HGIWPEENNGA AGVASPASDI KGKYVQSVTV ANGVVTAQMK  
 101 SDGVNKEIKN KKLSLWARRE AGSVKWF CGQ PVTRDKAVTD DAVKDVTGND  
 151 KIETKHLFST CRDNFDAS

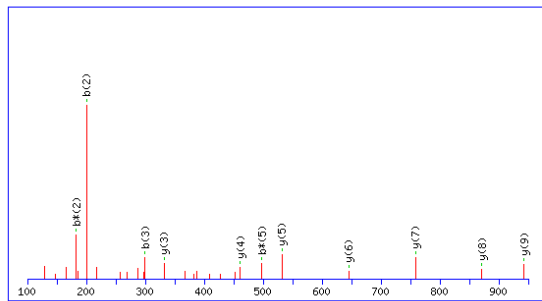

Monoisotopic mass of neutral peptide Mr(calc): 1455.7933  
 Ions Score: 63 Expect: 0.0073  
 Matches (**Bold Red**): 11/142 fragment ions using 14 most intense peaks

| #  | b               | b <sup>++</sup> | b <sup>*</sup>  | b <sup>+++</sup> | b <sup>0</sup> | b <sup>0++</sup> | Seq. | y               | y <sup>++</sup> | y <sup>*</sup> | y <sup>+++</sup> | y <sup>0</sup> | y <sup>0++</sup> | #  |
|----|-----------------|-----------------|-----------------|------------------|----------------|------------------|------|-----------------|-----------------|----------------|------------------|----------------|------------------|----|
| 1  | 72.0444         | 36.5258         |                 |                  |                |                  | A    |                 |                 |                |                  |                |                  | 14 |
| 2  | <b>200.1030</b> | 100.5551        | <b>183.0764</b> | 92.0418          |                |                  | Q    | 1385.7635       | 693.3854        | 1368.7369      | 684.8721         | 1367.7529      | 684.3801         | 13 |
| 3  | <b>299.1714</b> | 150.0893        | 282.1448        | 141.5761         |                |                  | V    | 1257.7049       | 629.3561        | 1240.6783      | 620.8428         | 1239.6943      | 620.3508         | 12 |
| 4  | 386.2034        | 193.6053        | 369.1769        | 185.0921         | 368.1928       | 184.6001         | S    | 1158.6365       | 579.8219        | 1141.6099      | 571.3086         | 1140.6259      | 570.8166         | 11 |
| 5  | 515.2460        | 258.1266        | <b>498.2195</b> | 249.6134         | 497.2354       | 249.1214         | E    | 1071.6045       | 536.3059        | 1054.5779      | 527.7926         | 1053.5939      | 527.3006         | 10 |
| 6  | 586.2831        | 293.6452        | 569.2566        | 285.1319         | 568.2726       | 284.6399         | A    | <b>942.5619</b> | 471.7846        | 925.5353       | 463.2713         | 924.5513       | 462.7793         | 9  |
| 7  | 699.3672        | 350.1872        | 682.3406        | 341.6740         | 681.3566       | 341.1819         | I    | <b>871.5247</b> | 436.2660        | 854.4982       | 427.7527         | 853.5142       | 427.2607         | 8  |
| 8  | 812.4512        | 406.7293        | 795.4247        | 398.2160         | 794.4407       | 397.7240         | L    | <b>758.4407</b> | 379.7240        | 741.4141       | 371.2107         | 740.4301       | 370.7187         | 7  |
| 9  | 925.5353        | 463.2713        | 908.5088        | 454.7580         | 907.5247       | 454.2660         | L    | <b>645.3566</b> | 323.1819        | 628.3301       | 314.6687         | 627.3461       | 314.1767         | 6  |
| 10 | 996.5724        | 498.7898        | 979.5459        | 490.2766         | 978.5619       | 489.7846         | A    | <b>532.2726</b> | 266.6399        | 515.2460       | 258.1266         | 514.2620       | 257.6346         | 5  |
| 11 | 1125.6150       | 563.3111        | 1108.5885       | 554.7979         | 1107.6045      | 554.3059         | E    | <b>461.2354</b> | 231.1214        | 444.2089       | 222.6081         | 443.2249       | 222.1161         | 4  |
| 12 | 1182.6365       | 591.8219        | 1165.6099       | 583.3086         | 1164.6259      | 582.8166         | G    | <b>332.1928</b> | 166.6001        | 315.1663       | 158.0868         |                |                  | 3  |
| 13 | 1310.6951       | 655.8512        | 1293.6685       | 647.3379         | 1292.6845      | 646.8459         | Q    | 275.1714        | 138.0893        | 258.1448       | 129.5761         |                |                  | 2  |
| 14 |                 |                 |                 |                  |                |                  | K    | 147.1128        | 74.0600         | 130.0863       | 65.5468          |                |                  | 1  |

# Protein band 61 (+Mn): pilO protein

Variable modifications: Carbamidomethyl (C), Oxidation (M)  
 Cleavage by Trypsin: cuts C-term side of KR unless next residue is P  
 Sequence Coverage: 15%

Score: 73

M<sub>r</sub>: 23301

Matched peptides shown in **Bold Red**

1 MASKSSKTNL DLNNLHLLNL PARLFIALLA VAAVLGLGYA GLFKSQMESL  
 51 EEYEAKETEL KNTYKQKSID **AASLNNLRDE LASIRSAFDI MLKQLPTDAE**  
 101 IPNLVQELHQ AGSSNGLRLD SVMPQPPVDD GPIKRLPYSI SITGNYEQIS  
 151 QFTRDVGSLS **RIITLESLKI** AQSPENGGNP DGKSSILNLS AIATTYQAKS  
 201 VEELAAEAAQ NAEQK

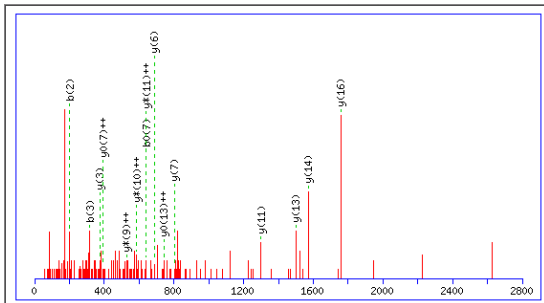

Monoisotopic mass of neutral peptide Mr(calc): 1957.0228  
 Ions Score: 6 Expect: 2.9e+03  
 Matches (**Bold Red**): 15/186 fragment ions using 84 most intense peaks

| #  | b               | b <sup>++</sup> | b <sup>*</sup> | b <sup>+++</sup> | b <sup>0</sup>  | b <sup>0++</sup> | Seq.     | y                | y <sup>++</sup> | y <sup>*</sup> | y <sup>+++</sup> | y <sup>0</sup> | y <sup>0++</sup> | #  |
|----|-----------------|-----------------|----------------|------------------|-----------------|------------------|----------|------------------|-----------------|----------------|------------------|----------------|------------------|----|
| 1  | 88.0393         | 44.5233         |                |                  | 70.0287         | 35.5180          | <b>S</b> |                  |                 |                |                  |                |                  | 18 |
| 2  | <b>201.1234</b> | 101.0653        |                |                  | 183.1128        | 92.0600          | <b>I</b> | 1870.9981        | 936.0027        | 1853.9716      | 927.4894         | 1852.9875      | 926.9974         | 17 |
| 3  | <b>316.1503</b> | 158.5788        |                |                  | 298.1397        | 149.5735         | <b>D</b> | <b>1757.9141</b> | 879.4607        | 1740.8875      | 870.9474         | 1739.9035      | 870.4554         | 16 |
| 4  | 387.1874        | 194.0974        |                |                  | 369.1769        | 185.0921         | <b>A</b> | 1642.8871        | 821.9472        | 1625.8606      | 813.4339         | 1624.8765      | 812.9419         | 15 |
| 5  | 458.2245        | 229.6159        |                |                  | 440.2140        | 220.6106         | <b>A</b> | <b>1571.8500</b> | 786.4286        | 1554.8234      | 777.9154         | 1553.8394      | 777.4234         | 14 |
| 6  | 545.2566        | 273.1319        |                |                  | 527.2460        | 264.1266         | <b>S</b> | <b>1500.8129</b> | 750.9101        | 1483.7863      | 742.3968         | 1482.8023      | <b>741.9048</b>  | 13 |
| 7  | 658.3406        | 329.6740        |                |                  | <b>640.3301</b> | 320.6687         | <b>L</b> | 1413.7809        | 707.3941        | 1396.7543      | 698.8808         | 1395.7703      | 698.3888         | 12 |
| 8  | 772.3836        | 386.6954        | 755.3570       | 378.1821         | 754.3730        | 377.6901         | <b>N</b> | <b>1300.6968</b> | 650.8520        | 1283.6702      | <b>642.3388</b>  | 1282.6862      | 641.8467         | 11 |
| 9  | 886.4265        | 443.7169        | 869.3999       | 435.2036         | 868.4159        | 434.7116         | <b>N</b> | 1186.6539        | 593.8306        | 1169.6273      | <b>585.3173</b>  | 1168.6433      | 584.8253         | 10 |
| 10 | 999.5105        | 500.2589        | 982.4840       | 491.7456         | 981.5000        | 491.2536         | <b>L</b> | 1072.6109        | 536.8091        | 1055.5844      | <b>528.2958</b>  | 1054.6004      | 527.8038         | 9  |
| 11 | 1155.6117       | 578.3095        | 1138.5851      | 569.7962         | 1137.6011       | 569.3042         | <b>R</b> | 959.5269         | 480.2671        | 942.5003       | 471.7538         | 941.5163       | 471.2618         | 8  |
| 12 | 1270.6386       | 635.8229        | 1253.6121      | 627.3097         | 1252.6280       | 626.8177         | <b>D</b> | <b>803.4258</b>  | 402.2165        | 786.3992       | 393.7032         | 785.4152       | <b>393.2112</b>  | 7  |
| 13 | 1399.6812       | 700.3442        | 1382.6546      | 691.8310         | 1381.6706       | 691.3390         | <b>E</b> | <b>688.3988</b>  | 344.7030        | 671.3723       | 336.1898         | 670.3882       | 335.6978         | 6  |
| 14 | 1512.7653       | 756.8863        | 1495.7387      | 748.3730         | 1494.7547       | 747.8810         | <b>L</b> | 559.3562         | 280.1817        | 542.3297       | 271.6685         | 541.3457       | 271.1765         | 5  |
| 15 | 1583.8024       | 792.4048        | 1566.7758      | 783.8916         | 1565.7918       | 783.3995         | <b>A</b> | 446.2722         | 223.6397        | 429.2456       | 215.1264         | 428.2616       | 214.6344         | 4  |
| 16 | 1670.8344       | 835.9208        | 1653.8079      | 827.4076         | 1652.8238       | 826.9156         | <b>S</b> | <b>375.2350</b>  | 188.1212        | 358.2085       | 179.6079         | 357.2245       | 179.1159         | 3  |
| 17 | 1783.9185       | 892.4629        | 1766.8919      | 883.9496         | 1765.9079       | 883.4576         | <b>I</b> | 288.2030         | 144.6051        | 271.1765       | 136.0919         |                |                  | 2  |
| 18 |                 |                 |                |                  |                 |                  | <b>R</b> | 175.1190         | 88.0631         | 158.0924       | 79.5498          |                |                  | 1  |

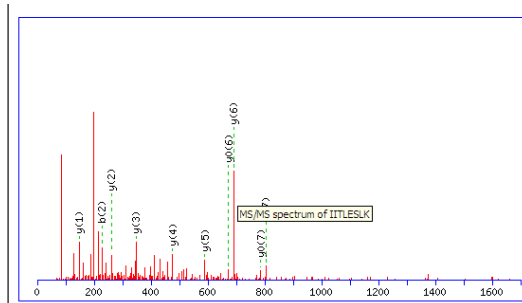

Monoisotopic mass of neutral peptide Mr(calc): 915.5641  
 Ions Score: 36 Expect: 5.2  
 Matches (**Bold Red**): 10/62 fragment ions using 23 most intense peaks

| # | b               | b <sup>++</sup> | b <sup>0</sup> | b <sup>0++</sup> | Seq.     | y               | y <sup>++</sup> | y <sup>*</sup> | y <sup>+++</sup> | y <sup>0</sup>  | y <sup>0++</sup> | # |
|---|-----------------|-----------------|----------------|------------------|----------|-----------------|-----------------|----------------|------------------|-----------------|------------------|---|
| 1 | 114.0913        | 57.5493         |                |                  | <b>I</b> |                 |                 |                |                  |                 |                  | 8 |
| 2 | <b>227.1754</b> | 114.0913        |                |                  | <b>I</b> | <b>803.4873</b> | 402.2473        | 786.4607       | 393.7340         | <b>785.4767</b> | 393.2420         | 7 |
| 3 | 328.2231        | 164.6152        | 310.2125       | 155.6099         | <b>T</b> | <b>690.4032</b> | 345.7053        | 673.3767       | 337.1920         | <b>672.3927</b> | 336.7000         | 6 |
| 4 | 441.3071        | 221.1572        | 423.2966       | 212.1519         | <b>L</b> | <b>589.3556</b> | 295.1814        | 572.3290       | 286.6681         | 571.3450        | 286.1761         | 5 |
| 5 | 570.3497        | 285.6785        | 552.3392       | 276.6732         | <b>E</b> | <b>476.2715</b> | 238.6394        | 459.2449       | 230.1261         | 458.2609        | 229.6341         | 4 |
| 6 | 657.3818        | 329.1945        | 639.3712       | 320.1892         | <b>S</b> | <b>347.2289</b> | 174.1181        | 330.2023       | 165.6048         | 329.2183        | 165.1128         | 3 |
| 7 | 770.4658        | 385.7366        | 752.4553       | 376.7313         | <b>L</b> | <b>260.1969</b> | 130.6021        | 243.1703       | 122.0888         |                 |                  | 2 |
| 8 |                 |                 |                |                  | <b>K</b> | <b>147.1128</b> | 74.0600         | 130.0863       | 65.5468          |                 |                  | 1 |

# Protein band 73 (+Mn): 50S ribosomal protein L9

Variable modifications: Carbamidomethyl (C), Oxidation (M)  
 Cleavage by Trypsin: cuts C-term side of KR unless next residue is P  
 Sequence Coverage: 28%

Score: 237

M<sub>r</sub>: 15687

Matched peptides shown in **Bold Red**

1 MQI**I**LL**E**K**I**G **GLGN**L**G**DI**V**T **V**K**NG**Y**A**R**N**F**L** **I**P**A**G**K**A**K**R**A**T E**A**N**M**K**E**F**E**A**R**  
 51 R**A**E**L**E**A**K**Q**A**E** **I**L**A**D**A**R**A**R**Q**E **K**L**D**G**Q**T**V**T**V**A **Q**K**A**G**V**D**G**R**H**N G**S**V**T**N**A**D**I**A**A**  
 101 **A**I**V**A**A**G**I**E**A**V **K**A**N**V**R**L**P**N**G**P **L**K**A**V**G**E**Y**E**V**E **V**A**L**H**T**D**A**V**A**K **I**T**V**A**V**I**A**A**A**E  
 151

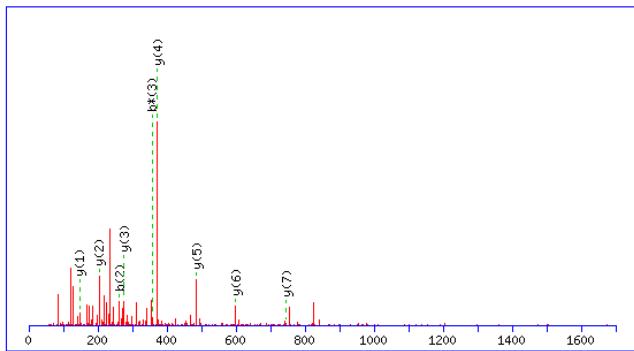

Monoisotopic mass of neutral peptide Mr(calc): 858.4963  
 Ions Score: 32 Expect: 14  
 Matches (**Bold Red**): 9/56 fragment ions using 36 most intense peaks

| # | b               | b <sup>++</sup> | b <sup>+</sup>  | b <sup>+++</sup> | Seq. | y               | y <sup>++</sup> | y <sup>+</sup> | y <sup>+++</sup> | # |
|---|-----------------|-----------------|-----------------|------------------|------|-----------------|-----------------|----------------|------------------|---|
| 1 | 115.0502        | 58.0287         | 98.0237         | 49.5155          | N    |                 |                 |                |                  | 8 |
| 2 | <b>262.1186</b> | 131.5629        | 245.0921        | 123.0497         | F    | <b>745.4607</b> | 373.2340        | 728.4341       | 364.7207         | 7 |
| 3 | 375.2027        | 188.1050        | <b>358.1761</b> | 179.5917         | L    | <b>598.3923</b> | 299.6998        | 581.3657       | 291.1865         | 6 |
| 4 | 488.2867        | 244.6470        | 471.2602        | 236.1337         | I    | <b>485.3082</b> | 243.1577        | 468.2817       | 234.6445         | 5 |
| 5 | 585.3395        | 293.1734        | 568.3130        | 284.6601         | P    | <b>372.2241</b> | 186.6157        | 355.1976       | 178.1024         | 4 |
| 6 | 656.3766        | 328.6919        | 639.3501        | 320.1787         | A    | <b>275.1714</b> | 138.0893        | 258.1448       | 129.5761         | 3 |
| 7 | 713.3981        | 357.2027        | 696.3715        | 348.6894         | G    | <b>204.1343</b> | 102.5708        | 187.1077       | 94.0575          | 2 |
| 8 |                 |                 |                 |                  | K    | <b>147.1128</b> | 74.0600         | 130.0863       | 65.5468          | 1 |

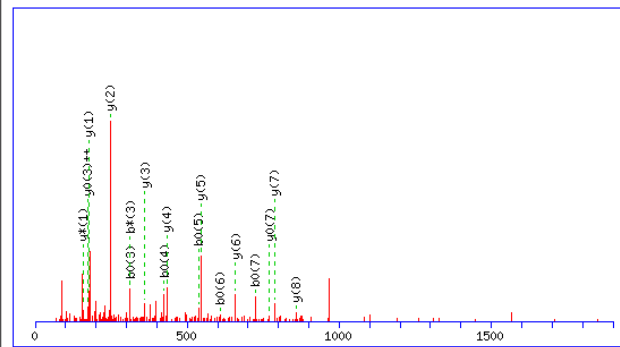

Monoisotopic mass of neutral peptide Mr(calc): 985.5192  
 Ions Score: 53 Expect: 0.11  
 Matches (**Bold Red**): 17/88 fragment ions using 29 most intense peaks

| # | b        | b <sup>++</sup> | b <sup>+</sup>  | b <sup>+++</sup> | b <sup>0</sup>  | b <sup>0++</sup> | Seq. | y               | y <sup>++</sup> | y <sup>+</sup>  | y <sup>+++</sup> | y <sup>0</sup>  | y <sup>0++</sup> | # |
|---|----------|-----------------|-----------------|------------------|-----------------|------------------|------|-----------------|-----------------|-----------------|------------------|-----------------|------------------|---|
| 1 | 129.0659 | 65.0366         | 112.0393        | 56.5233          |                 |                  | Q    |                 |                 |                 |                  |                 |                  | 9 |
| 2 | 200.1030 | 100.5551        | 183.0764        | 92.0418          |                 |                  | A    | <b>858.4680</b> | 429.7376        | 841.4414        | 421.2243         | 840.4574        | 420.7323         | 8 |
| 3 | 329.1456 | 165.0764        | <b>312.1190</b> | 156.5631         | <b>311.1350</b> | 156.0711         | E    | <b>787.4308</b> | 394.2191        | 770.4043        | 385.7058         | <b>769.4203</b> | 385.2138         | 7 |
| 4 | 442.2296 | 221.6185        | 425.2031        | 213.1052         | <b>424.2191</b> | 212.6132         | I    | <b>658.3883</b> | 329.6978        | 641.3617        | 321.1845         | 640.3777        | 320.6925         | 6 |
| 5 | 555.3137 | 278.1605        | 538.2871        | 269.6472         | <b>537.3031</b> | 269.1552         | L    | <b>545.3042</b> | 273.1557        | 528.2776        | 264.6425         | 527.2936        | 264.1504         | 5 |
| 6 | 626.3508 | 313.6790        | 609.3243        | 305.1658         | <b>608.3402</b> | 304.6738         | A    | <b>432.2201</b> | 216.6137        | 415.1936        | 208.1004         | 414.2096        | 207.6084         | 4 |
| 7 | 741.3777 | 371.1925        | 724.3512        | 362.6792         | <b>723.3672</b> | 362.1872         | D    | <b>361.1830</b> | 181.0951        | 344.1565        | 172.5819         | 343.1724        | <b>172.0899</b>  | 3 |
| 8 | 812.4149 | 406.7111        | 795.3883        | 398.1978         | 794.4043        | 397.7058         | A    | <b>246.1561</b> | 123.5817        | 229.1295        | 115.0684         |                 |                  | 2 |
| 9 |          |                 |                 |                  |                 |                  | R    | <b>175.1190</b> | 88.0631         | <b>158.0924</b> | 79.5498          |                 |                  | 1 |

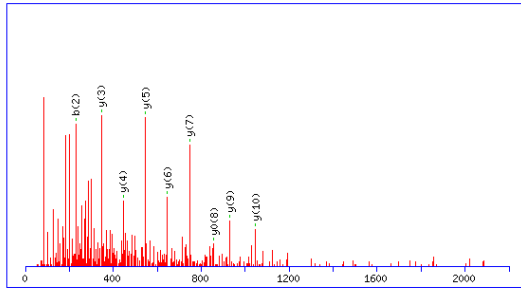

Monoisotopic mass of neutral peptide Mr(calc): 1158.6245  
 Ions Score: 51 Expect: 0.14  
 Matches (Bold Red): 9/104 fragment ions using 17 most intense peaks

| #  | b               | b <sup>++</sup> | b <sup>*</sup> | b <sup>+++</sup> | b <sup>0</sup> | b <sup>0++</sup> | Seq. | y                | y <sup>++</sup> | y <sup>*</sup> | y <sup>+++</sup> | y <sup>0</sup>  | y <sup>0++</sup> | #  |
|----|-----------------|-----------------|----------------|------------------|----------------|------------------|------|------------------|-----------------|----------------|------------------|-----------------|------------------|----|
| 1  | 114.0913        | 57.5493         |                |                  |                |                  | L    |                  |                 |                |                  |                 |                  | 11 |
| 2  | <b>229.1183</b> | 115.0628        |                |                  | 211.1077       | 106.0575         | D    | <b>1046.5477</b> | 523.7775        | 1029.5211      | 515.2642         | 1028.5371       | 514.7722         | 10 |
| 3  | 286.1397        | 143.5735        |                |                  | 268.1292       | 134.5682         | G    | <b>931.5207</b>  | 466.2640        | 914.4942       | 457.7507         | 913.5102        | 457.2587         | 9  |
| 4  | 414.1983        | 207.6028        | 397.1718       | 199.0895         | 396.1878       | 198.5975         | Q    | 874.4993         | 437.7533        | 857.4727       | 429.2400         | <b>856.4887</b> | 428.7480         | 8  |
| 5  | 515.2460        | 258.1266        | 498.2195       | 249.6134         | 497.2354       | 249.1214         | T    | <b>746.4407</b>  | 373.7240        | 729.4141       | 365.2107         | 728.4301        | 364.7187         | 7  |
| 6  | 614.3144        | 307.6608        | 597.2879       | 299.1476         | 596.3039       | 298.6556         | V    | <b>645.3930</b>  | 323.2001        | 628.3665       | 314.6869         | 627.3824        | 314.1949         | 6  |
| 7  | 715.3621        | 358.1847        | 698.3355       | 349.6714         | 697.3515       | 349.1794         | T    | <b>546.3246</b>  | 273.6659        | 529.2980       | 265.1527         | 528.3140        | 264.6607         | 5  |
| 8  | 814.4305        | 407.7189        | 797.4040       | 399.2056         | 796.4199       | 398.7136         | V    | <b>445.2769</b>  | 223.1421        | 428.2504       | 214.6288         |                 |                  | 4  |
| 9  | 885.4676        | 443.2375        | 868.4411       | 434.7242         | 867.4571       | 434.2322         | A    | <b>346.2085</b>  | 173.6079        | 329.1819       | 165.0946         |                 |                  | 3  |
| 10 | 1013.5262       | 507.2667        | 996.4997       | 498.7535         | 995.5156       | 498.2615         | Q    | 275.1714         | 138.0893        | 258.1448       | 129.5761         |                 |                  | 2  |
| 11 |                 |                 |                |                  |                |                  | K    | 147.1128         | 74.0600         | 130.0863       | 65.5468          |                 |                  | 1  |

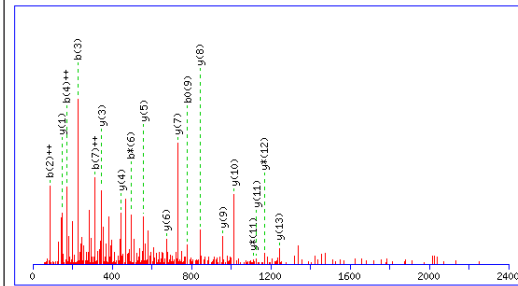

Monoisotopic mass of neutral peptide Mr(calc): 1354.7820  
 Ions Score: 101 Expect: 1.2e-06  
 Matches (Bold Red): 20/126 fragment ions using 28 most intense peaks

| #  | b               | b <sup>++</sup> | b <sup>*</sup>  | b <sup>+++</sup> | b <sup>0</sup>  | b <sup>0++</sup> | Seq. | y                | y <sup>++</sup> | y <sup>*</sup>   | y <sup>+++</sup> | y <sup>0</sup> | y <sup>0++</sup> | #  |
|----|-----------------|-----------------|-----------------|------------------|-----------------|------------------|------|------------------|-----------------|------------------|------------------|----------------|------------------|----|
| 1  | 114.0913        | 57.5493         |                 |                  |                 |                  | I    |                  |                 |                  |                  |                |                  | 14 |
| 2  | <b>171.1128</b> | <b>86.0600</b>  |                 |                  |                 |                  | G    | <b>1242.7052</b> | 621.8563        | 1225.6787        | 613.3430         | 1224.6947      | 612.8510         | 13 |
| 3  | <b>228.1343</b> | 114.5708        |                 |                  |                 |                  | G    | 1185.6838        | 593.3455        | <b>1168.6572</b> | 584.8322         | 1167.6732      | 584.3402         | 12 |
| 4  | 341.2183        | <b>171.1128</b> |                 |                  |                 |                  | L    | <b>1128.6623</b> | 564.8348        | <b>1111.6358</b> | 556.3215         | 1110.6517      | 555.8295         | 11 |
| 5  | 398.2398        | 199.6235        |                 |                  |                 |                  | G    | <b>1015.5782</b> | 508.2928        | 998.5517         | 499.7795         | 997.5677       | 499.2875         | 10 |
| 6  | 512.2827        | 256.6450        | <b>495.2562</b> | 248.1317         |                 |                  | N    | <b>958.5568</b>  | 479.7820        | 941.5302         | 471.2688         | 940.5462       | 470.7767         | 9  |
| 7  | 625.3668        | <b>313.1870</b> | 608.3402        | 304.6738         |                 |                  | L    | <b>844.5138</b>  | 422.7606        | 827.4873         | 414.2473         | 826.5033       | 413.7553         | 8  |
| 8  | 682.3883        | 341.6978        | 665.3617        | 333.1845         |                 |                  | G    | <b>731.4298</b>  | 366.2185        | 714.4032         | 357.7053         | 713.4192       | 357.2132         | 7  |
| 9  | 797.4152        | 399.2112        | 780.3886        | 390.6980         | <b>779.4046</b> | 390.2060         | D    | <b>674.4083</b>  | 337.7078        | 657.3818         | 329.1945         | 656.3978       | 328.7025         | 6  |
| 10 | 910.4993        | 455.7533        | 893.4727        | 447.2400         | 892.4887        | 446.7480         | I    | <b>559.3814</b>  | 280.1943        | 542.3548         | 271.6811         | 541.3708       | 271.1890         | 5  |
| 11 | 1009.5677       | 505.2875        | 992.5411        | 496.7742         | 991.5571        | 496.2822         | V    | <b>446.2973</b>  | 223.6523        | 429.2708         | 215.1390         | 428.2867       | 214.6470         | 4  |
| 12 | 1110.6154       | 555.8113        | 1093.5888       | 547.2980         | 1092.6048       | 546.8060         | T    | <b>347.2289</b>  | 174.1181        | 330.2023         | 165.6048         | 329.2183       | 165.1128         | 3  |
| 13 | 1209.6838       | 605.3455        | 1192.6572       | 596.8322         | 1191.6732       | 596.3402         | V    | 246.1812         | 123.5942        | 229.1547         | 115.0810         |                |                  | 2  |
| 14 |                 |                 |                 |                  |                 |                  | K    | <b>147.1128</b>  | 74.0600         | 130.0863         | 65.5468          |                |                  | 1  |

# Protein band 73 (+Mn): 50S ribosomal protein L20

Variable modifications: Carbamidomethyl (C), Oxidation (M)  
 Cleavage by Trypsin: cuts C-term side of KR unless next residue is P  
 Sequence Coverage: 15%

Score: 112  $M_r$ : 13664

Matched peptides shown in **Bold Red**

1 MPRVKGVTA RARHQKIFAL AKGYRGRRNK VYRVAQAVM KAGQYAYRDR  
 51 RQRKRQFRQL WIVRINAGTR ENGLSYSKFM NGLKRASIEI DRKVLADLAV  
 101 **FDKAAFAQLV EKAKAALAA**

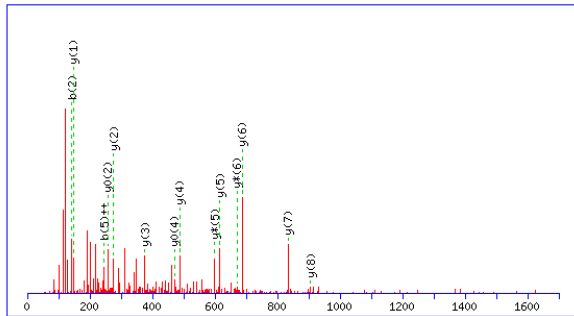

Monoisotopic mass of neutral peptide  $M_r(\text{calc})$ : 975.5389  
 Ions Score: 44 Expect: 0.77  
 Matches (**Bold Red**): 14/72 fragment ions using 51 most intense peaks

| # | b               | b <sup>++</sup> | b <sup>*</sup> | b <sup>++*</sup> | b <sup>0</sup> | b <sup>0++</sup> | Seq. | y               | y <sup>++</sup> | y <sup>*</sup>  | y <sup>++*</sup> | y <sup>0</sup>  | y <sup>0++</sup> | # |
|---|-----------------|-----------------|----------------|------------------|----------------|------------------|------|-----------------|-----------------|-----------------|------------------|-----------------|------------------|---|
| 1 | 72.0444         | 36.5258         |                |                  |                |                  | A    |                 |                 |                 |                  |                 |                  | 9 |
| 2 | <b>143.0815</b> | 72.0444         |                |                  |                |                  | A    | <b>905.5091</b> | 453.2582        | 888.4825        | 444.7449         | 887.4985        | 444.2529         | 8 |
| 3 | 290.1499        | 145.5786        |                |                  |                |                  | F    | <b>834.4720</b> | 417.7396        | 817.4454        | 409.2264         | 816.4614        | 408.7343         | 7 |
| 4 | 361.1870        | 181.0972        |                |                  |                |                  | A    | <b>687.4036</b> | 344.2054        | <b>670.3770</b> | 335.6921         | 669.3930        | 335.2001         | 6 |
| 5 | 489.2456        | <b>245.1264</b> | 472.2191       | 236.6132         |                |                  | Q    | <b>616.3665</b> | 308.6869        | <b>599.3399</b> | 300.1736         | 598.3559        | 299.6816         | 5 |
| 6 | 602.3297        | 301.6685        | 585.3031       | 293.1552         |                |                  | L    | <b>488.3079</b> | 244.6576        | 471.2813        | 236.1443         | <b>470.2973</b> | 235.6523         | 4 |
| 7 | 701.3981        | 351.2027        | 684.3715       | 342.6894         |                |                  | V    | <b>375.2238</b> | 188.1155        | 358.1973        | 179.6023         | 357.2132        | 179.1103         | 3 |
| 8 | 830.4407        | 415.7240        | 813.4141       | 407.2107         | 812.4301       | 406.7187         | E    | <b>276.1554</b> | 138.5813        | 259.1288        | 130.0681         | <b>258.1448</b> | 129.5761         | 2 |
| 9 |                 |                 |                |                  |                |                  | K    | <b>147.1128</b> | 74.0600         | 130.0863        | 65.5468          |                 |                  | 1 |

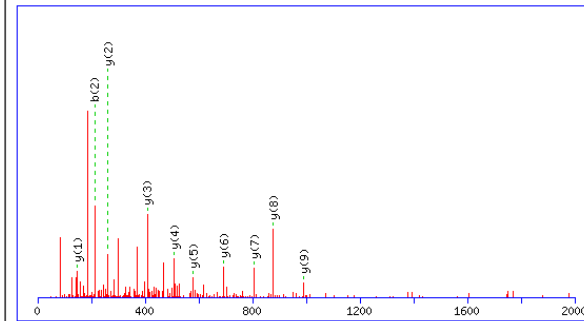

Monoisotopic mass of neutral peptide  $M_r(\text{calc})$ : 1089.6070  
 Ions Score: 68 Expect: 0.003  
 Matches (**Bold Red**): 10/82 fragment ions using 25 most intense peaks

| #  | b               | b <sup>++</sup> | b <sup>0</sup> | b <sup>0++</sup> | Seq. | y               | y <sup>++</sup> | y <sup>*</sup> | y <sup>++*</sup> | y <sup>0</sup> | y <sup>0++</sup> | #  |
|----|-----------------|-----------------|----------------|------------------|------|-----------------|-----------------|----------------|------------------|----------------|------------------|----|
| 1  | 100.0757        | 50.5415         |                |                  | V    |                 |                 |                |                  |                |                  | 10 |
| 2  | <b>213.1598</b> | 107.0835        |                |                  | L    | <b>991.5459</b> | 496.2766        | 974.5193       | 487.7633         | 973.5353       | 487.2713         | 9  |
| 3  | 284.1969        | 142.6021        |                |                  | A    | <b>878.4618</b> | 439.7345        | 861.4353       | 431.2213         | 860.4512       | 430.7293         | 8  |
| 4  | 399.2238        | 200.1155        | 381.2132       | 191.1103         | D    | <b>807.4247</b> | 404.2160        | 790.3981       | 395.7027         | 789.4141       | 395.2107         | 7  |
| 5  | 512.3079        | 256.6576        | 494.2973       | 247.6523         | L    | <b>692.3978</b> | 346.7025        | 675.3712       | 338.1892         | 674.3872       | 337.6972         | 6  |
| 6  | 583.3450        | 292.1761        | 565.3344       | 283.1709         | A    | <b>579.3137</b> | 290.1605        | 562.2871       | 281.6472         | 561.3031       | 281.1552         | 5  |
| 7  | 682.4134        | 341.7103        | 664.4028       | 332.7051         | V    | <b>508.2766</b> | 254.6419        | 491.2500       | 246.1287         | 490.2660       | 245.6366         | 4  |
| 8  | 829.4818        | 415.2445        | 811.4713       | 406.2393         | F    | <b>409.2082</b> | 205.1077        | 392.1816       | 196.5944         | 391.1976       | 196.1024         | 3  |
| 9  | 944.5088        | 472.7580        | 926.4982       | 463.7527         | D    | <b>262.1397</b> | 131.5735        | 245.1132       | 123.0602         | 244.1292       | 122.5682         | 2  |
| 10 |                 |                 |                |                  | K    | <b>147.1128</b> | 74.0600         | 130.0863       | 65.5468          |                |                  | 1  |



# Protein band 73 (+Mn): 30S ribosomal protein S9

Variable modifications: Carbamidomethyl (C), Oxidation (M)

Cleavage by Trypsin: cuts C-term side of KR unless next residue is P

Sequence Coverage: 12%

Score: 63

M<sub>r</sub>: 14363

Matched peptides shown in **Red**

1 MNGKYYYGTG RRKSSVARVF LIKGTGQIIV NGRPVDEFFA RETSRMVVRQ  
 51 PLVLTEAES FDIK**VNVVGG GETGQSGAIR** HGITRALIDF DAALKPALSQ  
 101 AGFVTRDARE VERKKPGLRK ARRAKQFSKR

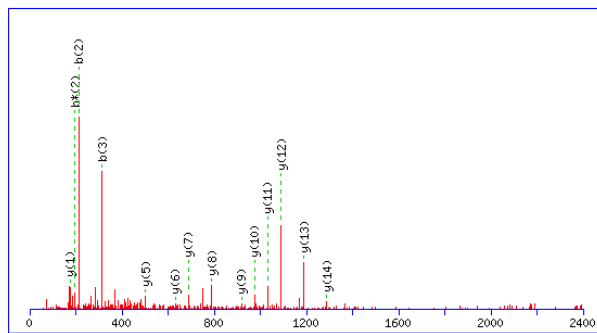

Monoisotopic mass of neutral peptide Mr(calc): 1499.7692  
 Ions Score: 63 Expect: 0.0071  
 Matches (**Red**): 14/156 fragment ions using 37 most intense peaks

| #  | b               | b <sup>++</sup> | b <sup>*</sup>  | b <sup>++</sup> | b <sup>0</sup> | b <sup>0++</sup> | Seq. | y                | y <sup>++</sup> | y <sup>*</sup> | y <sup>++</sup> | y <sup>0</sup> | y <sup>0++</sup> | #  |
|----|-----------------|-----------------|-----------------|-----------------|----------------|------------------|------|------------------|-----------------|----------------|-----------------|----------------|------------------|----|
| 1  | 100.0757        | 50.5415         |                 |                 |                |                  | V    |                  |                 |                |                 |                |                  | 16 |
| 2  | <b>214.1186</b> | 107.5629        | <b>197.0921</b> | 99.0497         |                |                  | N    | 1401.7081        | 701.3577        | 1384.6815      | 692.8444        | 1383.6975      | 692.3524         | 15 |
| 3  | <b>313.1870</b> | 157.0972        | 296.1605        | 148.5839        |                |                  | V    | <b>1287.6652</b> | 644.3362        | 1270.6386      | 635.8229        | 1269.6546      | 635.3309         | 14 |
| 4  | 412.2554        | 206.6314        | 395.2289        | 198.1181        |                |                  | V    | <b>1188.5967</b> | 594.8020        | 1171.5702      | 586.2887        | 1170.5862      | 585.7967         | 13 |
| 5  | 469.2769        | 235.1421        | 452.2504        | 226.6288        |                |                  | G    | <b>1089.5283</b> | 545.2678        | 1072.5018      | 536.7545        | 1071.5178      | 536.2625         | 12 |
| 6  | 526.2984        | 263.6528        | 509.2718        | 255.1396        |                |                  | G    | <b>1032.5069</b> | 516.7571        | 1015.4803      | 508.2438        | 1014.4963      | 507.7518         | 11 |
| 7  | 583.3198        | 292.1636        | 566.2933        | 283.6503        |                |                  | G    | <b>975.4854</b>  | 488.2463        | 958.4589       | 479.7331        | 957.4748       | 479.2411         | 10 |
| 8  | 712.3624        | 356.6849        | 695.3359        | 348.1716        | 694.3519       | 347.6796         | E    | <b>918.4639</b>  | 459.7356        | 901.4374       | 451.2223        | 900.4534       | 450.7303         | 9  |
| 9  | 813.4101        | 407.2087        | 796.3836        | 398.6954        | 795.3995       | 398.2034         | T    | <b>789.4213</b>  | 395.2143        | 772.3948       | 386.7010        | 771.4108       | 386.2090         | 8  |
| 10 | 870.4316        | 435.7194        | 853.4050        | 427.2062        | 852.4210       | 426.7141         | G    | <b>688.3737</b>  | 344.6905        | 671.3471       | 336.1772        | 670.3631       | 335.6852         | 7  |
| 11 | 998.4902        | 499.7487        | 981.4636        | 491.2354        | 980.4796       | 490.7434         | Q    | <b>631.3522</b>  | 316.1797        | 614.3257       | 307.6665        | 613.3416       | 307.1745         | 6  |
| 12 | 1085.5222       | 543.2647        | 1068.4956       | 534.7515        | 1067.5116      | 534.2594         | S    | <b>503.2936</b>  | 252.1504        | 486.2671       | 243.6372        | 485.2831       | 243.1452         | 5  |
| 13 | 1142.5436       | 571.7755        | 1125.5171       | 563.2622        | 1124.5331      | 562.7702         | A    | 416.2616         | 208.6344        | 399.2350       | 200.1212        |                |                  | 4  |
| 14 | 1213.5808       | 607.2940        | 1196.5542       | 598.7807        | 1195.5702      | 598.2887         | G    | 359.2401         | 180.1237        | 342.2136       | 171.6104        |                |                  | 3  |
| 15 | 1326.6648       | 663.8360        | 1309.6383       | 655.3228        | 1308.6543      | 654.8308         | I    | 288.2030         | 144.6051        | 271.1765       | 136.0919        |                |                  | 2  |
| 16 |                 |                 |                 |                 |                |                  | R    | <b>175.1190</b>  | 88.0631         | 158.0924       | 79.5498         |                |                  | 1  |

# Protein band 78 (-Mn): Transferrin-binding protein A

Score: 140

M<sub>r</sub>: 101940

Variable modifications: Carbamidomethyl (C), Oxidation (M)  
 Cleavage by Trypsin: cuts C-term side of KR unless next residue is P  
 Sequence Coverage: 3%

Matched peptides shown in **Bold Red**

```

1 MQQQHLLFRFN ILCLSLMTAL PAYAENVQAG QAQEKQLDTI QVKAKKQKTR
51 RDNEVTGLGK LVKTADTILSK EQVLDIRDLT RYDFGIIVVE QGRGASSGYS
101 IRGMDNRNVA LTVDGLAQIQ SVTAQALGG TRTAGSSGAI NEIEYENVKA
151 VEISKGSNSV EQSSGALAGS VAFQTKTADD VIGEGRQWGI QSKTAYSGKN
201 RGLTQSIALA GRIGGAEALL IRTGRHAGEI RAHEAAGRGV QSFNRLAPVD
251 DASTWAYFIV EEECKNRDYE TCKAKPKKDV DGKDERQTVS TRDYTGPNRF
301 LADPLSYESR SWLFRPGRFR ENKRHYIGGI LERTQQTFDI RDMTVPAFLT
351 KAVFEDENKKY GSIRGYGKYA GDHRYGGLIT NSENGAQVGA EYGTGVFVDE
401 IHTKSRYGLE VVYINADKDI WADYARLSVD RQIGLDNHF QQTHCSADGS
451 DKYCRPSADK FSSYYKSDRV IYGESHRLIQ AAFKKSFDTA KIRHNLVSNL
501 GYDRFGSGLR HQDYVYQHAN RAYSLKTPFP NGDKKTIIPPV GGKDKPYWVS
551 IGGGNVVTGQ ICGFNNTYT DCTPRRINGK SYAAVRDYNV RLGWRADVGA
601 GLRYDYRSTH SDDGSVSTGT HRTLSWNTGI VLPKPADWLDL TYRTSTGFRL
651 PSFAEMYGWR SGDKIKAVKI DPEKSFNKEA GIVFKGDFGN LEASWFNNAY
701 RDLIVRGYEV EITDGKEQAK GDPAYLNAQS ARITGINILG KIDWNGVWVK
751 LPEGWYSTFA YNRVRVDIK KRADRDIQS HLFDAIQPSR VVVGSGYDQP
801 EGGKGVNGLM TYSKAKETIPE LLGSRALLNG NSRNTKATAR RTRFWIYVDV
851 SGYYTVKKHF TLRAGVYNLL NHRYVTWENV RQTAAGAVNQ HKNVGVYNNRY
901 AAFGRNYTFS LEMKF
    
```

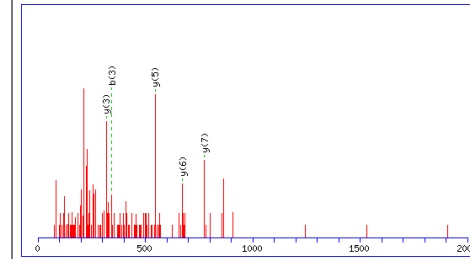

Monoisotopic mass of neutral peptide Mr(calc): 1016.5502  
 Ions Score: 18 Expect: 3.5e+02  
 Matches (**Bold Red**): 5/78 fragment ions using 10 most intense peaks

| #        | b               | b <sup>++</sup> | b <sup>0</sup> | b <sup>0++</sup> | Seq.     | y               | y <sup>++</sup> | y <sup>+</sup> | y <sup>+++</sup> | y <sup>0</sup> | y <sup>0++</sup> | #        |
|----------|-----------------|-----------------|----------------|------------------|----------|-----------------|-----------------|----------------|------------------|----------------|------------------|----------|
| 1        | 130.0499        | 65.5286         | 112.0393       | 56.5233          | <b>E</b> |                 |                 |                |                  |                |                  | <b>9</b> |
| 2        | 243.1339        | 122.0706        | 225.1234       | 113.0653         | <b>I</b> | 888.5149        | 444.7611        | 871.4884       | 436.2478         | 870.5043       | 435.7558         | <b>8</b> |
| <b>3</b> | <b>344.1816</b> | 172.5944        | 326.1710       | 163.5892         | <b>T</b> | <b>775.4308</b> | 388.2191        | 758.4043       | 379.7058         | 757.4203       | 379.2138         | <b>7</b> |
| 4        | 473.2242        | 237.1157        | 455.2136       | 228.1105         | <b>E</b> | <b>674.3832</b> | 337.6952        | 657.3566       | 329.1819         | 656.3726       | 328.6899         | <b>6</b> |
| 5        | 586.3083        | 293.6578        | 568.2977       | 284.6525         | <b>L</b> | <b>545.3406</b> | 273.1739        | 528.3140       | 264.6606         | 527.3300       | 264.1686         | <b>5</b> |
| <b>6</b> | <b>699.3923</b> | 350.1998        | 681.3818       | 341.1945         | <b>L</b> | 432.2565        | 216.6319        | 415.2300       | 208.1186         | 414.2459       | 207.6266         | <b>4</b> |
| 7        | 756.4138        | 378.7105        | 738.4032       | 369.7053         | <b>G</b> | <b>319.1724</b> | 160.0899        | 302.1459       | 151.5766         | 301.1619       | 151.0846         | <b>3</b> |
| <b>8</b> | <b>843.4458</b> | 422.2266        | 825.4353       | 413.2213         | <b>S</b> | 262.1510        | 131.5791        | 245.1244       | 123.0659         | 244.1404       | 122.5738         | <b>2</b> |
| <b>9</b> |                 |                 |                |                  | <b>R</b> | 175.1190        | 88.0631         | 158.0924       | 79.5498          |                |                  | <b>1</b> |

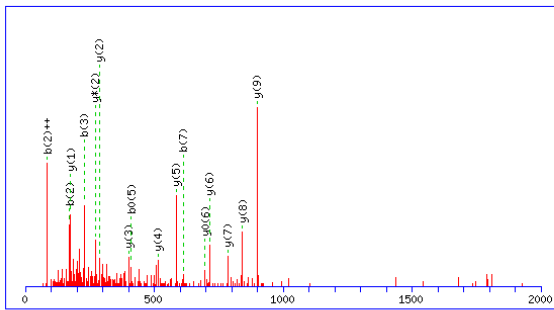

Monoisotopic mass of neutral peptide Mr(calc): 1011.6077  
 Ions Score: 88 Expect: 2.8e-05  
 Matches (**Bold Red**): 16/72 fragment ions using 27 most intense peaks

| #         | b               | b <sup>++</sup> | b <sup>0</sup>  | b <sup>0++</sup> | Seq.     | y               | y <sup>++</sup> | y <sup>+</sup>  | y <sup>+++</sup> | y <sup>0</sup>  | y <sup>0++</sup> | #         |
|-----------|-----------------|-----------------|-----------------|------------------|----------|-----------------|-----------------|-----------------|------------------|-----------------|------------------|-----------|
| 1         | 114.0913        | 57.5493         |                 |                  | <b>I</b> |                 |                 |                 |                  |                 |                  | <b>10</b> |
| 2         | <b>171.1128</b> | <b>86.0600</b>  |                 |                  | <b>G</b> | <b>899.5309</b> | 450.2691        | 882.5043        | 441.7558         | 881.5203        | 441.2638         | <b>9</b>  |
| 3         | <b>228.1343</b> | 114.5708        |                 |                  | <b>G</b> | <b>842.5094</b> | 421.7584        | 825.4829        | 413.2451         | 824.4989        | 412.7531         | <b>8</b>  |
| 4         | 299.1714        | 150.0893        |                 |                  | <b>A</b> | <b>785.4880</b> | 393.2476        | 768.4614        | 384.7343         | 767.4774        | 384.2423         | <b>7</b>  |
| 5         | 428.2140        | 214.6106        | <b>410.2034</b> | 205.6053         | <b>E</b> | <b>714.4509</b> | 357.7291        | 697.4243        | 349.2158         | <b>696.4403</b> | 348.7238         | <b>6</b>  |
| 6         | 499.2511        | 250.1292        | 481.2405        | 241.1239         | <b>A</b> | <b>585.4083</b> | 293.2078        | 568.3817        | 284.6945         |                 |                  | <b>5</b>  |
| 7         | <b>612.3352</b> | 306.6712        | 594.3246        | 297.6659         | <b>L</b> | <b>514.3711</b> | 257.6892        | 497.3446        | 249.1759         |                 |                  | <b>4</b>  |
| 8         | 725.4192        | 363.2132        | 707.4087        | 354.2080         | <b>L</b> | <b>401.2871</b> | 201.1472        | 384.2605        | 192.6339         |                 |                  | <b>3</b>  |
| 9         | 838.5033        | 419.7553        | 820.4927        | 410.7500         | <b>I</b> | <b>288.2030</b> | 144.6051        | <b>271.1765</b> | 136.0919         |                 |                  | <b>2</b>  |
| <b>10</b> |                 |                 |                 |                  | <b>R</b> | <b>175.1190</b> | 88.0631         | 158.0924        | 79.5498          |                 |                  | <b>1</b>  |

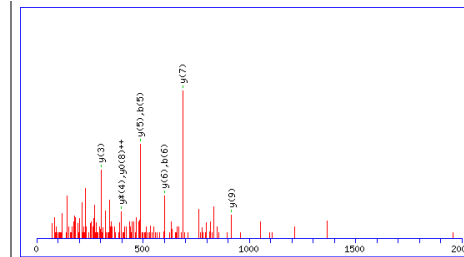

Monoisotopic mass of neutral peptide Mr(calc): 1085.6193  
 Ions Score: 35 Expect: 5.9  
 Matches (**Bold Red**): 9/98 fragment ions using 13 most intense peaks

| #         | b               | b <sup>++</sup> | b <sup>+</sup> | b <sup>+++</sup> | b <sup>0</sup> | b <sup>0++</sup> | Seq.     | y               | y <sup>++</sup> | y <sup>+</sup>  | y <sup>+++</sup> | y <sup>0</sup> | y <sup>0++</sup> | #         |
|-----------|-----------------|-----------------|----------------|------------------|----------------|------------------|----------|-----------------|-----------------|-----------------|------------------|----------------|------------------|-----------|
| 1         | 58.0287         | 29.5180         |                |                  |                |                  | <b>G</b> |                 |                 |                 |                  |                |                  | <b>11</b> |
| 2         | 171.1128        | 86.0600         |                |                  |                |                  | <b>L</b> | 1029.6051       | 515.3062        | 1012.5786       | 506.7929         | 1011.5946      | 506.3009         | <b>10</b> |
| 3         | 272.1605        | 136.5839        |                |                  | 254.1499       | 127.5786         | <b>T</b> | <b>916.5211</b> | 458.7642        | 899.4945        | 450.2509         | 898.5105       | 449.7589         | <b>9</b>  |
| 4         | 400.2191        | 200.6132        | 383.1925       | 192.0999         | 382.2085       | 191.6079         | <b>Q</b> | 815.4734        | 408.2403        | 798.4468        | 399.7271         | 797.4628       | <b>399.2350</b>  | <b>8</b>  |
| 5         | <b>487.2511</b> | 244.1292        | 470.2245       | 235.6159         | 469.2405       | 235.1239         | <b>S</b> | <b>687.4148</b> | 344.2110        | 670.3883        | 335.6978         | 669.4042       | 335.2058         | <b>7</b>  |
| 6         | <b>600.3352</b> | 300.6712        | 583.3086       | 292.1579         | 582.3246       | 291.6659         | <b>I</b> | <b>600.3828</b> | 300.6950        | 583.3562        | 292.1817         |                |                  | <b>6</b>  |
| 7         | 671.3723        | 336.1898        | 654.3457       | 327.6765         | 653.3617       | 327.1845         | <b>A</b> | <b>487.2987</b> | 244.1530        | 470.2722        | 235.6397         |                |                  | <b>5</b>  |
| 8         | 784.4563        | 392.7318        | 767.4298       | 384.2185         | 766.4458       | 383.7265         | <b>L</b> | 416.2616        | 208.6344        | <b>399.2350</b> | 200.1212         |                |                  | <b>4</b>  |
| 9         | 855.4934        | 428.2504        | 838.4669       | 419.7371         | 837.4829       | 419.2451         | <b>A</b> | <b>303.1775</b> | 152.0924        | 286.1510        | 143.5791         |                |                  | <b>3</b>  |
| 10        | 912.5149        | 456.7611        | 895.4884       | 448.2478         | 894.5043       | 447.7558         | <b>G</b> | 232.1404        | 116.5738        | 215.1139        | 108.0606         |                |                  | <b>2</b>  |
| <b>11</b> |                 |                 |                |                  |                |                  | <b>R</b> | 175.1190        | 88.0631         | 158.0924        | 79.5498          |                |                  | <b>1</b>  |

# Protein band 82 (-Mn): PilQ

Score: 467

M<sub>r</sub>: 77943

Variable modifications: Carbamidomethyl (C), Oxidation (M)  
 Cleavage by Trypsin: cuts C-term side of KR unless next residue is P  
 Sequence Coverage: 19%

Matched peptides shown in **Bold Red**

```

1 MNTKLTIIIS GLFVATAAFQ TASAGNITDI KVSSLPNKQK IVKVSFDKEI
51 VNPTGFVTSS PARIALDFEQ TGISMDQQVL EYADPLLSKI SAAQNSSRAR
101 LVLNLNKPQQ YNTEVRGNKV WIFINESDDT VSAPARPAVK AAPAAPAKQQ
151 AAAPFTESV SVSAPFSPAK QQAASAKQT NIDFRKDGKN AGIILAAALG
201 FAGQPDISQQ HDHIIIVLKN HILPTALQRS LDVADFKTPV QKVTLKRLNN
251 DTQLIIITTG NWELVNKSAA PGYTFQVLP KKQNLESQGV NNAFKTFTGR
301 KISLDFQDVE IRTLIQILAK ESGMNIVASD SVSGKMTLSL KDVPDQALD
351 LVMQARNLDM RQQGNIVNIA PRDELLAKDK AFLQAEKDIA DLGALYSQNF
401 QLKYKNVEEF RSILRLDNAD TTGNRNLTVS GRGSVLIDFA TNLIVIDTR
451 SVIEKFRKLI DELDVPAQQV MIEARIVEAA DGFSRDLGVK FGATGRKKLK
501 NETSAFGWGV NSGFGGGDKW EAQTKINLPV AAAANSISLV RAISSGALNL
551 ELSASELSK TKTLANPRVL TQNRKEAKIE SGYEIPFTVT TASGGGNSTN
601 TELKKAVLGL TVTPTNITPDG QIIMTVKINK DSPAQCASGN NTLICISTKS
651 LNTQAMVENG GTLIVGGIYE ENNGNLTIKV PLLGDIPVIG NLFKTRGKKT
701 DRRELLIFIT PRIIDTAGNS LRY
    
```

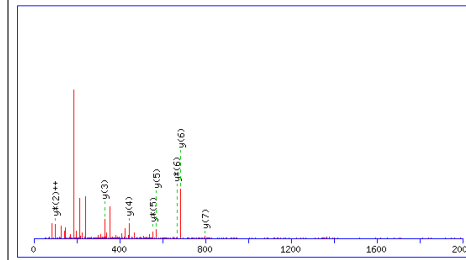

Monoisotopic mass of neutral peptide Mr(calc): 898.5851  
 Ions Score: 24 Expect: 71  
 Matches (**Bold Red**): 8/64 fragment ions using 21 most intense peaks

| #        | b        | b <sup>++</sup> | b <sup>*</sup> | b <sup>+++</sup> | b <sup>0</sup> | b <sup>0++</sup> | Seq.     | y               | y <sup>++</sup> | y <sup>*</sup>  | y <sup>+++</sup> | #        |
|----------|----------|-----------------|----------------|------------------|----------------|------------------|----------|-----------------|-----------------|-----------------|------------------|----------|
| 1        | 102.0550 | 51.5311         |                |                  | 84.0444        | 42.5258          | <b>T</b> |                 |                 |                 |                  | <b>8</b> |
| 2        | 215.1390 | 108.0731        |                |                  | 197.1285       | 99.0679          | <b>I</b> | <b>798.5448</b> | 399.7760        | 781.5182        | 391.2627         | <b>7</b> |
| 3        | 328.2231 | 164.6152        |                |                  | 310.2125       | 155.6099         | <b>L</b> | <b>685.4607</b> | 343.2340        | <b>668.4341</b> | 334.7207         | <b>6</b> |
| 4        | 456.2817 | 228.6445        | 439.2551       | 220.1312         | 438.2711       | 219.6392         | <b>Q</b> | <b>572.3766</b> | 286.6920        | <b>555.3501</b> | 278.1787         | <b>5</b> |
| 5        | 569.3657 | 285.1865        | 552.3392       | 276.6732         | 551.3552       | 276.1812         | <b>I</b> | <b>444.3180</b> | 222.6627        | 427.2915        | 214.1494         | <b>4</b> |
| 6        | 682.4498 | 341.7285        | 665.4232       | 333.2153         | 664.4392       | 332.7233         | <b>L</b> | <b>331.2340</b> | 166.1206        | 314.2074        | 157.6074         | <b>3</b> |
| 7        | 753.4869 | 377.2471        | 736.4604       | 368.7338         | 735.4763       | 368.2418         | <b>A</b> | 218.1499        | 109.5786        | 201.1234        | <b>101.0653</b>  | <b>2</b> |
| <b>8</b> |          |                 |                |                  |                |                  | <b>K</b> | 147.1128        | 74.0600         | 130.0863        | 65.5468          | <b>1</b> |

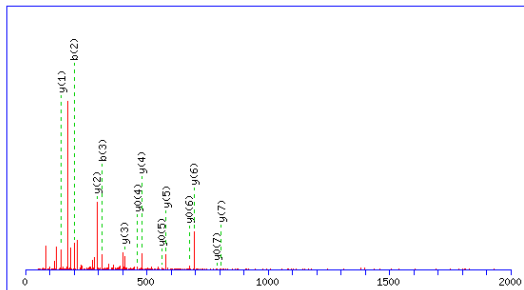

Monoisotopic mass of neutral peptide Mr(calc): 893.4494  
 Ions Score: 46 Expect: 0.46  
 Matches (**Bold Red**): 13/66 fragment ions using 38 most intense peaks

| #        | b               | b <sup>++</sup> | b <sup>0</sup> | b <sup>0++</sup> | Seq.     | y               | y <sup>++</sup> | y <sup>*</sup> | y <sup>+++</sup> | y <sup>0</sup>  | y <sup>0++</sup> | #        |
|----------|-----------------|-----------------|----------------|------------------|----------|-----------------|-----------------|----------------|------------------|-----------------|------------------|----------|
| 1        | 88.0393         | 44.5233         | 70.0287        | 35.5180          | <b>S</b> |                 |                 |                |                  |                 |                  | <b>8</b> |
| 2        | <b>201.1234</b> | 101.0653        | 183.1128       | 92.0600          | <b>L</b> | <b>807.4247</b> | 404.2160        | 790.3981       | 395.7027         | <b>789.4141</b> | 395.2107         | <b>7</b> |
| 3        | <b>316.1503</b> | 158.5788        | 298.1397       | 149.5735         | <b>D</b> | <b>694.3406</b> | 347.6740        | 677.3141       | 339.1607         | <b>676.3301</b> | 338.6687         | <b>6</b> |
| 4        | 415.2187        | 208.1130        | 397.2082       | 199.1077         | <b>V</b> | <b>579.3137</b> | 290.1605        | 562.2871       | 281.6472         | <b>561.3031</b> | 281.1552         | <b>5</b> |
| 5        | 486.2558        | 243.6316        | 468.2453       | 234.6263         | <b>A</b> | <b>480.2453</b> | 240.6263        | 463.2187       | 232.1130         | <b>462.2347</b> | 231.6210         | <b>4</b> |
| 6        | 601.2828        | 301.1450        | 583.2722       | 292.1397         | <b>D</b> | <b>409.2082</b> | 205.1077        | 392.1816       | 196.5944         | 391.1976        | 196.1024         | <b>3</b> |
| 7        | 748.3512        | 374.6792        | 730.3406       | 365.6740         | <b>F</b> | <b>294.1812</b> | 147.5942        | 277.1547       | 139.0810         |                 |                  | <b>2</b> |
| <b>8</b> |                 |                 |                |                  | <b>K</b> | 147.1128        | 74.0600         | 130.0863       | 65.5468          |                 |                  | <b>1</b> |

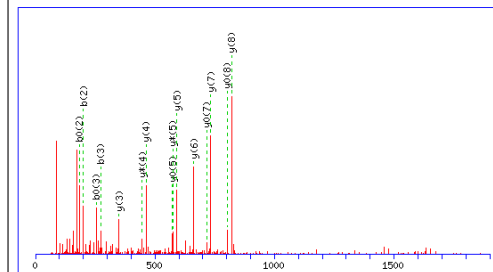

Monoisotopic mass of neutral peptide Mr(calc): 932.4675  
 Ions Score: 39 Expect: 2.6  
 Matches (**Bold Red**): 15/84 fragment ions using 30 most intense peaks

| #        | b               | b <sup>++</sup> | b <sup>*</sup> | b <sup>+++</sup> | b <sup>0</sup>  | b <sup>0++</sup> | Seq.     | y               | y <sup>++</sup> | y <sup>*</sup>  | y <sup>+++</sup> | y <sup>0</sup>  | y <sup>0++</sup> | #        |
|----------|-----------------|-----------------|----------------|------------------|-----------------|------------------|----------|-----------------|-----------------|-----------------|------------------|-----------------|------------------|----------|
| 1        | 114.0913        | 57.5493         |                |                  |                 |                  | <b>I</b> |                 |                 |                 |                  |                 |                  | <b>9</b> |
| 2        | <b>201.1234</b> | 101.0653        |                |                  | 183.1128        | 92.0600          | <b>S</b> | <b>820.3908</b> | 410.6990        | 803.3642        | 402.1857         | <b>802.3802</b> | 401.6937         | <b>8</b> |
| 3        | <b>272.1605</b> | 136.5839        |                |                  | <b>254.1499</b> | 127.5786         | <b>A</b> | <b>733.3587</b> | 367.1830        | 716.3322        | 358.6697         | <b>715.3482</b> | 358.1777         | <b>7</b> |
| 4        | 343.1976        | 172.1024        |                |                  | 325.1870        | 163.0972         | <b>A</b> | <b>662.3216</b> | 331.6645        | 645.2951        | 323.1512         | 644.3111        | 322.6592         | <b>6</b> |
| 5        | 471.2562        | 236.1317        | 454.2296       | 227.6185         | 453.2456        | 227.1264         | <b>Q</b> | <b>591.2845</b> | 296.1459        | <b>574.2580</b> | 287.6326         | <b>573.2739</b> | 287.1406         | <b>5</b> |
| 6        | 585.2991        | 293.1532        | 568.2726       | 284.6399         | 567.2885        | 284.1479         | <b>N</b> | <b>463.2259</b> | 232.1166        | <b>446.1994</b> | 223.6033         | 445.2154        | 223.1113         | <b>4</b> |
| 7        | 672.3311        | 336.6692        | 655.3046       | 328.1559         | 654.3206        | 327.6639         | <b>S</b> | <b>349.1830</b> | 175.0951        | 332.1565        | 166.5819         | 331.1724        | 166.0899         | <b>3</b> |
| 8        | 759.3632        | 380.1852        | 742.3366       | 371.6719         | 741.3526        | 371.1799         | <b>S</b> | 262.1510        | 131.5791        | 245.1244        | 123.0659         | 244.1404        | 122.5738         | <b>2</b> |
| <b>9</b> |                 |                 |                |                  |                 |                  | <b>R</b> | 175.1190        | 88.0631         | 158.0924        | 79.5498          |                 |                  | <b>1</b> |

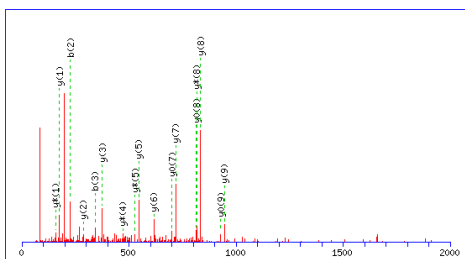

Monoisotopic mass of neutral peptide Mr(calc): 1058.5720  
 Ions Score: 60 Expect: 0.022  
 Matches (Bold Red): 17/88 fragment ions using 36 most intense peaks

| #  | b               | b <sup>++</sup> | b <sup>*</sup> | b <sup>+++</sup> | b <sup>0</sup> | b <sup>0++</sup> | Seq.     | y               | y <sup>++</sup> | y <sup>*</sup>  | y <sup>+++</sup> | y <sup>0</sup>  | y <sup>0++</sup> | #  |
|----|-----------------|-----------------|----------------|------------------|----------------|------------------|----------|-----------------|-----------------|-----------------|------------------|-----------------|------------------|----|
| 1  | 114.0913        | 57.5493         |                |                  |                |                  | I        |                 |                 |                 |                  |                 |                  | 10 |
| 2  | <b>227.1754</b> | 114.0913        |                |                  |                |                  | <b>I</b> | <b>946.4952</b> | 473.7513        | 929.4687        | 465.2380         | <b>928.4847</b> | 464.7460         | 9  |
| 3  | <b>342.2023</b> | 171.6048        |                |                  | 324.1918       | 162.5995         | <b>D</b> | <b>833.4112</b> | 417.2092        | <b>816.3846</b> | 408.6959         | <b>815.4006</b> | 408.2039         | 8  |
| 4  | 443.2500        | 222.1287        |                |                  | 425.2395       | 213.1234         | T        | <b>718.3842</b> | 359.6958        | 701.3577        | 351.1825         | <b>700.3737</b> | 350.6905         | 7  |
| 5  | 514.2871        | 257.6472        |                |                  | 496.2766       | 248.6419         | A        | <b>617.3365</b> | 309.1719        | 600.3100        | 300.6586         | 599.3260        | 300.1666         | 6  |
| 6  | 571.3086        | 286.1579        |                |                  | 553.2980       | 277.1527         | G        | <b>546.2994</b> | 273.6534        | <b>529.2729</b> | 265.1401         | 528.2889        | 264.6481         | 5  |
| 7  | 685.3515        | 343.1794        | 668.3250       | 334.6661         | 667.3410       | 334.1741         | N        | 489.2780        | 245.1426        | <b>472.2514</b> | 236.6293         | 471.2674        | 236.1373         | 4  |
| 8  | 772.3836        | 386.6954        | 755.3570       | 378.1821         | 754.3730       | 377.6901         | S        | <b>375.2350</b> | 188.1212        | 358.2085        | 179.6079         | 357.2245        | 179.1159         | 3  |
| 9  | 885.4676        | 443.2374        | 868.4411       | 434.7242         | 867.4571       | 434.2322         | L        | <b>288.2030</b> | 144.6051        | 271.1765        | 136.0919         |                 |                  | 2  |
| 10 |                 |                 |                |                  |                |                  | R        | <b>175.1190</b> | 88.0631         | <b>158.0924</b> | 79.5498          |                 |                  | 1  |

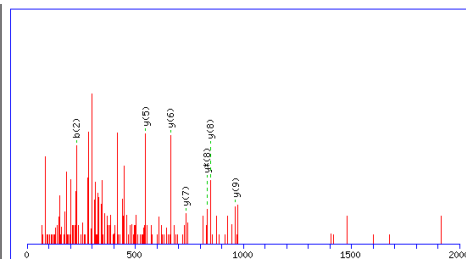

Monoisotopic mass of neutral peptide Mr(calc): 1075.4894  
 Ions Score: 30 Expect: 18  
 Matches (Bold Red): 7/96 fragment ions using 13 most intense peaks

| #  | b               | b <sup>++</sup> | b <sup>*</sup> | b <sup>+++</sup> | b <sup>0</sup> | b <sup>0++</sup> | Seq.     | y               | y <sup>++</sup> | y <sup>*</sup>  | y <sup>+++</sup> | y <sup>0</sup> | y <sup>0++</sup> | #  |
|----|-----------------|-----------------|----------------|------------------|----------------|------------------|----------|-----------------|-----------------|-----------------|------------------|----------------|------------------|----|
| 1  | 114.0913        | 57.5493         |                |                  |                |                  | L        |                 |                 |                 |                  |                |                  | 10 |
| 2  | <b>229.1183</b> | 115.0628        |                |                  |                |                  | <b>D</b> | <b>963.4126</b> | 482.2100        | 946.3861        | 473.6967         | 945.4021       | 473.2047         | 9  |
| 3  | 343.1612        | 172.0842        | 326.1347       | 163.5710         | 325.1506       | 163.0790         | N        | <b>848.3857</b> | 424.6965        | <b>831.3591</b> | 416.1832         | 830.3751       | 415.6912         | 8  |
| 4  | 414.1983        | 207.6028        | 397.1718       | 199.0895         | 396.1878       | 198.5975         | A        | <b>734.3428</b> | 367.6750        | 717.3162        | 359.1617         | 716.3322       | 358.6697         | 7  |
| 5  | 529.2253        | 265.1163        | 512.1987       | 256.6030         | 511.2147       | 256.1110         | D        | <b>663.3056</b> | 332.1565        | 646.2791        | 323.6432         | 645.2951       | 323.1512         | 6  |
| 6  | 630.2729        | 315.6401        | 613.2464       | 307.1268         | 612.2624       | 306.6348         | T        | <b>548.2787</b> | 274.6430        | 531.2522        | 266.1297         | 530.2681       | 265.6377         | 5  |
| 7  | 731.3206        | 366.1640        | 714.2941       | 357.6507         | 713.3101       | 357.1587         | T        | 447.2310        | 224.1191        | 430.2045        | 215.6059         | 429.2205       | 215.1139         | 4  |
| 8  | 788.3421        | 394.6747        | 771.3155       | 386.1614         | 770.3315       | 385.6694         | G        | 346.1833        | 173.5953        | 329.1568        | 165.0820         |                |                  | 3  |
| 9  | 902.3850        | 451.6961        | 885.3585       | 443.1829         | 884.3745       | 442.6909         | N        | 289.1619        | 145.0846        | 272.1353        | 136.5713         |                |                  | 2  |
| 10 |                 |                 |                |                  |                |                  | R        | <b>175.1190</b> | 88.0631         | <b>158.0924</b> | 79.5498          |                |                  | 1  |

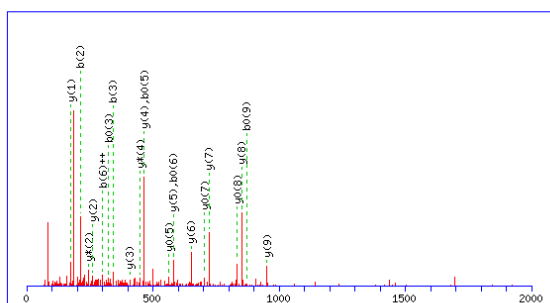

Monoisotopic mass of neutral peptide Mr(calc): 1063.5298  
 Ions Score: 45 Expect: 0.61  
 Matches (Bold Red): 21/84 fragment ions using 62 most intense peaks

| #  | b               | b <sup>++</sup> | b <sup>0</sup>  | b <sup>0++</sup> | Seq. | y               | y <sup>++</sup> | y <sup>*</sup>  | y <sup>+++</sup> | y <sup>0</sup>  | y <sup>0++</sup> | #  |
|----|-----------------|-----------------|-----------------|------------------|------|-----------------|-----------------|-----------------|------------------|-----------------|------------------|----|
| 1  | 114.0913        | 57.5493         |                 |                  | I    |                 |                 |                 |                  |                 |                  | 10 |
| 2  | <b>213.1598</b> | 107.0835        |                 |                  | V    | <b>951.4530</b> | 476.2302        | 934.4265        | 467.7169         | 933.4425        | 467.2249         | 9  |
| 3  | <b>342.2023</b> | 171.6048        | <b>324.1918</b> | 162.5995         | E    | <b>852.3846</b> | 426.6959        | 835.3581        | 418.1827         | <b>834.3741</b> | 417.6907         | 8  |
| 4  | 413.2395        | 207.1234        | 395.2289        | 198.1181         | A    | <b>723.3420</b> | 362.1747        | 706.3155        | 353.6614         | <b>705.3315</b> | 353.1694         | 7  |
| 5  | 484.2766        | 242.6419        | <b>466.2660</b> | 233.6366         | A    | <b>652.3049</b> | 326.6561        | 635.2784        | 318.1428         | 634.2944        | 317.6508         | 6  |
| 6  | 599.3035        | <b>300.1554</b> | <b>581.2930</b> | 291.1501         | D    | <b>581.2678</b> | 291.1375        | 564.2413        | 282.6243         | <b>563.2572</b> | 282.1323         | 5  |
| 7  | 656.3250        | 328.6661        | 638.3144        | 319.6608         | G    | <b>466.2409</b> | 233.6241        | <b>449.2143</b> | 225.1108         | 448.2303        | 224.6188         | 4  |
| 8  | 803.3934        | 402.2003        | 785.3828        | 393.1951         | F    | <b>409.2194</b> | 205.1133        | 392.1928        | 196.6001         | 391.2088        | 196.1081         | 3  |
| 9  | 890.4254        | 445.7163        | <b>872.4149</b> | 436.7111         | S    | <b>262.1510</b> | 131.5791        | <b>245.1244</b> | 123.0659         | 244.1404        | 122.5738         | 2  |
| 10 |                 |                 |                 |                  | R    | <b>175.1190</b> | 88.0631         | <b>158.0924</b> | 79.5498          |                 |                  | 1  |

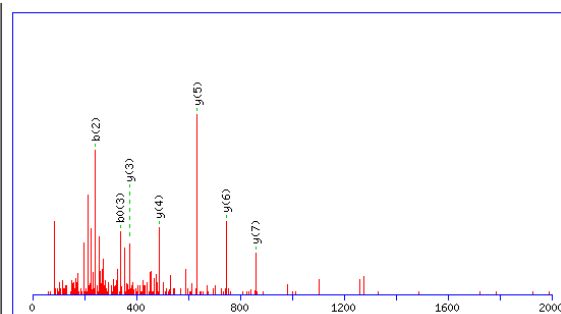

Monoisotopic mass of neutral peptide Mr(calc): 1100.6594  
 Ions Score: 37 Expect: 3.6  
 Matches (Bold Red): 7/76 fragment ions using 14 most intense peaks

| # | b               | b <sup>++</sup> | b <sup>0</sup>  | b <sup>0++</sup> | Seq. | y               | y <sup>++</sup> | y <sup>*</sup>  | y <sup>+++</sup> | y <sup>0</sup> | y <sup>0++</sup> | # |
|---|-----------------|-----------------|-----------------|------------------|------|-----------------|-----------------|-----------------|------------------|----------------|------------------|---|
| 1 | 130.0499        | 65.5286         | 112.0393        | 56.5233          | E    |                 |                 |                 |                  |                |                  | 9 |
| 2 | <b>243.1339</b> | 122.0706        | 225.1234        | 113.0653         | L    | 972.6241        | 486.8157        | 955.5975        | 478.3024         | 954.6135       | 477.8104         | 8 |
| 3 | 356.2180        | 178.6126        | <b>338.2074</b> | 169.6074         | L    | <b>859.5400</b> | 430.2736        | 842.5135        | 421.7604         | 841.5294       | 421.2684         | 7 |
| 4 | 469.3021        | 235.1547        | 451.2915        | 226.1494         | I    | <b>746.4559</b> | 373.7316        | 729.4294        | 365.2183         | 728.4454       | 364.7263         | 6 |
| 5 | 616.3705        | 308.6889        | 598.3599        | 299.6836         | F    | <b>633.3719</b> | 317.1896        | 616.3453        | 308.6763         | 615.3613       | 308.1843         | 5 |
| 6 | 729.4545        | 365.2309        | 711.4440        | 356.2256         | I    | <b>486.3035</b> | 243.6554        | 469.2769        | 235.1421         | 468.2929       | 234.6501         | 4 |
| 7 | 830.5022        | 415.7547        | 812.4917        | 406.7495         | T    | <b>373.2194</b> | 187.1133        | 356.1928        | 178.6001         | 355.2088       | 178.1081         | 3 |
| 8 | 927.5550        | 464.2811        | 909.5444        | 455.2758         | P    | 272.1717        | 136.5895        | 255.1452        | 128.0762         |                |                  | 2 |
| 9 |                 |                 |                 |                  | R    | <b>175.1190</b> | 88.0631         | <b>158.0924</b> | 79.5498          |                |                  | 1 |

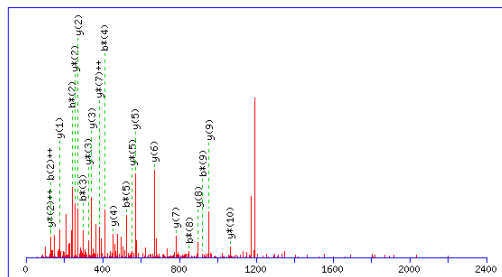

Monoisotopic mass of neutral peptide Mr(calc): 1208.6626  
 Ions Score: 42 Expect: 1.1  
 Matches (Bold Red): 23/80 fragment ions using 51 most intense peaks

| #  | b               | b <sup>++</sup> | b <sup>+</sup>  | b <sup>+++</sup> | Seq.     | y               | y <sup>++</sup> | y <sup>+</sup>   | y <sup>+++</sup> | #         |
|----|-----------------|-----------------|-----------------|------------------|----------|-----------------|-----------------|------------------|------------------|-----------|
| 1  | <b>129.0659</b> | 65.0366         | 112.0393        | 56.5233          | <b>Q</b> |                 |                 |                  |                  | 11        |
| 2  | 257.1244        | <b>129.0659</b> | <b>240.0979</b> | 120.5526         | <b>Q</b> | 1081.6113       | 541.3093        | <b>1064.5847</b> | 532.7960         | <b>10</b> |
| 3  | 314.1459        | 157.5766        | <b>297.1193</b> | 149.0633         | <b>G</b> | <b>953.5527</b> | 477.2800        | 936.5261         | 468.7667         | <b>9</b>  |
| 4  | 428.1888        | 214.5980        | <b>411.1623</b> | 206.0848         | <b>N</b> | <b>896.5312</b> | 448.7693        | 879.5047         | 440.2560         | <b>8</b>  |
| 5  | 541.2729        | 271.1401        | <b>524.2463</b> | 262.6268         | <b>I</b> | <b>782.4883</b> | 391.7478        | 765.4617         | <b>383.2345</b>  | <b>7</b>  |
| 6  | 640.3413        | 320.6743        | 623.3148        | 312.1610         | <b>V</b> | <b>669.4042</b> | 335.2058        | 652.3777         | 326.6925         | <b>6</b>  |
| 7  | 754.3842        | 377.6958        | 737.3577        | 369.1825         | <b>N</b> | <b>570.3358</b> | 285.6715        | <b>553.3093</b>  | 277.1583         | <b>5</b>  |
| 8  | 867.4683        | 434.2378        | <b>850.4417</b> | 425.7245         | <b>I</b> | <b>456.2929</b> | 228.6501        | 439.2663         | 220.1368         | <b>4</b>  |
| 9  | 938.5054        | 469.7563        | <b>921.4789</b> | 461.2431         | <b>A</b> | <b>343.2088</b> | 172.1081        | <b>326.1823</b>  | 163.5948         | <b>3</b>  |
| 10 | 1035.5582       | 518.2827        | 1018.5316       | 509.7694         | <b>P</b> | <b>272.1717</b> | 136.5895        | <b>255.1452</b>  | <b>128.0762</b>  | <b>2</b>  |
| 11 |                 |                 |                 |                  | <b>R</b> | <b>175.1190</b> | 88.0631         | 158.0924         | 79.5498          | <b>1</b>  |

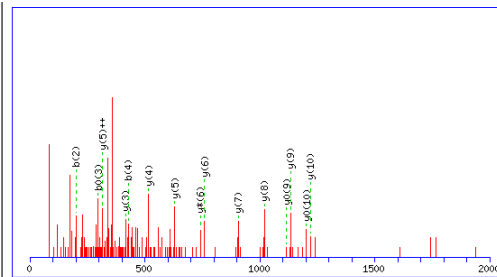

Monoisotopic mass of neutral peptide Mr(calc): 1333.6878  
 Ions Score: 51 Expect: 0.14  
 Matches (Bold Red): 15/104 fragment ions using 25 most intense peaks

| #  | b               | b <sup>++</sup> | b <sup>+</sup> | b <sup>+++</sup> | b <sup>0</sup>  | b <sup>0++</sup> | Seq.     | y                | y <sup>++</sup> | y <sup>+</sup>  | y <sup>+++</sup> | y <sup>0</sup>   | y <sup>0++</sup> | #         |
|----|-----------------|-----------------|----------------|------------------|-----------------|------------------|----------|------------------|-----------------|-----------------|------------------|------------------|------------------|-----------|
| 1  | 114.0913        | 57.5493         |                |                  |                 |                  | <b>I</b> |                  |                 |                 |                  |                  |                  | 11        |
| 2  | <b>201.1234</b> | 101.0653        |                |                  | 183.1128        | 92.0600          | <b>S</b> | <b>1221.6110</b> | 611.3091        | 1204.5844       | 602.7959         | <b>1203.6004</b> | 602.3039         | <b>10</b> |
| 3  | 314.2074        | 157.6074        |                |                  | <b>296.1969</b> | 148.6021         | <b>L</b> | <b>1134.5790</b> | 567.7931        | 1117.5524       | 559.2798         | <b>1116.5684</b> | 558.7878         | <b>9</b>  |
| 4  | <b>429.2344</b> | 215.1208        |                |                  | 411.2238        | 206.1155         | <b>D</b> | <b>1021.4949</b> | 511.2511        | 1004.4684       | 502.7378         | 1003.4843        | 502.2458         | <b>8</b>  |
| 5  | 576.3028        | 288.6550        |                |                  | 558.2922        | 279.6498         | <b>F</b> | <b>906.4680</b>  | 453.7376        | 889.4414        | 445.2243         | 888.4574         | 444.7323         | <b>7</b>  |
| 6  | 704.3614        | 352.6843        | 687.3348       | 344.1710         | 686.3508        | 343.6790         | <b>Q</b> | <b>759.3995</b>  | 380.2034        | <b>742.3730</b> | 371.6901         | 741.3890         | 371.1981         | <b>6</b>  |
| 7  | 819.3883        | 410.1978        | 802.3618       | 401.6845         | 801.3777        | 401.1925         | <b>D</b> | <b>631.3410</b>  | <b>316.1741</b> | 614.3144        | 307.6608         | 613.3304         | 307.1688         | <b>5</b>  |
| 8  | 918.4567        | 459.7320        | 901.4302       | 451.2187         | 900.4462        | 450.7267         | <b>V</b> | <b>516.3140</b>  | 258.6606        | 499.2875        | 250.1474         | 498.3035         | 249.6554         | <b>4</b>  |
| 9  | 1047.4993       | 524.2533        | 1030.4728      | 515.7400         | 1029.4888       | 515.2480         | <b>E</b> | <b>417.2456</b>  | 209.1264        | 400.2191        | 200.6132         | 399.2350         | 200.1212         | <b>3</b>  |
| 10 | 1160.5834       | 580.7953        | 1143.5568      | 572.2821         | 1142.5728       | 571.7900         | <b>I</b> | 288.2030         | 144.6051        | 271.1765        | 136.0919         |                  |                  | <b>2</b>  |
| 11 |                 |                 |                |                  |                 |                  | <b>R</b> | 175.1190         | 88.0631         | 158.0924        | 79.5498          |                  |                  | <b>1</b>  |

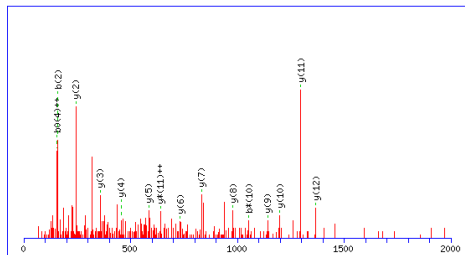

Monoisotopic mass of neutral peptide Mr(calc): 1524.7977  
 Ions Score: 59 Expect: 0.021  
 Matches (Bold Red): 15/126 fragment ions using 31 most intense peaks

| #  | b               | b <sup>++</sup> | b <sup>+</sup>   | b <sup>+++</sup> | b <sup>0</sup> | b <sup>0++</sup> | Seq.     | y                | y <sup>++</sup> | y <sup>+</sup> | y <sup>+++</sup> | y <sup>0</sup> | y <sup>0++</sup> | #         |
|----|-----------------|-----------------|------------------|------------------|----------------|------------------|----------|------------------|-----------------|----------------|------------------|----------------|------------------|-----------|
| 1  | 88.0393         | 44.5233         |                  |                  | 70.0287        | 35.5180          | <b>S</b> |                  |                 |                |                  |                |                  | 14        |
| 2  | <b>159.0764</b> | 80.0418         |                  |                  | 141.0659       | 71.0366          | <b>A</b> | 1438.7729        | 719.8901        | 1421.7464      | 711.3768         | 1420.7624      | 710.8848         | <b>13</b> |
| 3  | 230.1135        | 115.5604        |                  |                  | 212.1030       | 106.5551         | <b>A</b> | <b>1367.7358</b> | 684.3715        | 1350.7093      | 675.8583         | 1349.7252      | 675.3663         | <b>12</b> |
| 4  | 327.1663        | 164.0868        |                  |                  | 309.1557       | <b>155.0815</b>  | <b>P</b> | <b>1296.6987</b> | 648.8530        | 1279.6721      | <b>640.3397</b>  | 1278.6881      | 639.8477         | <b>11</b> |
| 5  | 384.1878        | 192.5975        |                  |                  | 366.1772       | 183.5922         | <b>G</b> | <b>1199.6459</b> | 600.3266        | 1182.6194      | 591.8133         | 1181.6354      | 591.3213         | <b>10</b> |
| 6  | 547.2511        | 274.1292        |                  |                  | 529.2405       | 265.1239         | <b>Y</b> | <b>1142.6245</b> | 571.8159        | 1125.5979      | 563.3026         | 1124.6139      | 562.8106         | <b>9</b>  |
| 7  | 694.3195        | 347.6634        |                  |                  | 676.3089       | 338.6581         | <b>F</b> | <b>979.5611</b>  | 490.2842        | 962.5346       | 481.7709         | 961.5506       | 481.2789         | <b>8</b>  |
| 8  | 795.3672        | 398.1872        |                  |                  | 777.3566       | 389.1819         | <b>T</b> | <b>832.4927</b>  | 416.7500        | 815.4662       | 408.2367         | 814.4822       | 407.7447         | <b>7</b>  |
| 9  | 942.4356        | 471.7214        |                  |                  | 924.4250       | 462.7162         | <b>F</b> | <b>731.4450</b>  | 366.2262        | 714.4185       | 357.7129         |                |                  | <b>6</b>  |
| 10 | 1070.4942       | 535.7507        | <b>1053.4676</b> | 527.2375         | 1052.4836      | 526.7454         | <b>Q</b> | <b>584.3766</b>  | 292.6920        | 567.3501       | 284.1787         |                |                  | <b>5</b>  |
| 11 | 1169.5626       | 585.2849        | 1152.5360        | 576.7717         | 1151.5520      | 576.2796         | <b>V</b> | <b>456.3180</b>  | 228.6627        | 439.2915       | 220.1494         |                |                  | <b>4</b>  |
| 12 | 1282.6467       | 641.8270        | 1265.6201        | 633.3137         | 1264.6361      | 632.8217         | <b>L</b> | <b>357.2496</b>  | 179.1285        | 340.2231       | 170.6152         |                |                  | <b>3</b>  |
| 13 | 1379.6994       | 690.3533        | 1362.6729        | 681.8401         | 1361.6889      | 681.3481         | <b>P</b> | <b>244.1656</b>  | 122.5864        | 227.1390       | 114.0731         |                |                  | <b>2</b>  |
| 14 |                 |                 |                  |                  |                |                  | <b>K</b> | 147.1128         | 74.0600         | 130.0863       | 65.5468          |                |                  | <b>1</b>  |

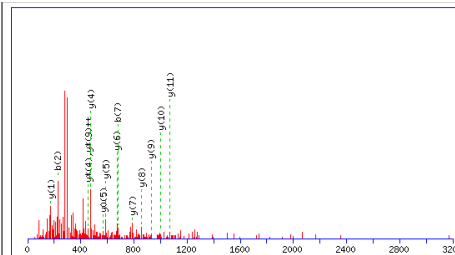

Monoisotopic mass of neutral peptide Mr(calc): 1607.9359  
 Ions Score: 30 Expect: 16  
 Matches (Bold Red): 14/152 fragment ions using 52 most intense peaks

| #  | b               | b <sup>++</sup> | b <sup>+</sup> | b <sup>+++</sup> | b <sup>0</sup> | b <sup>0++</sup> | Seq.     | y                | y <sup>++</sup> | y <sup>+</sup> | y <sup>+++</sup> | y <sup>0</sup> | y <sup>0++</sup> | #         |
|----|-----------------|-----------------|----------------|------------------|----------------|------------------|----------|------------------|-----------------|----------------|------------------|----------------|------------------|-----------|
| 1  | 114.0913        | 57.5493         |                |                  |                |                  | <b>I</b> |                  |                 |                |                  |                |                  | 16        |
| 2  | <b>228.1343</b> | 114.5708        | 211.1077       | 106.0575         |                |                  | <b>N</b> | 1495.8591        | 748.4332        | 1478.8326      | 739.9199         | 1477.8485      | 739.4279         | <b>15</b> |
| 3  | 341.2183        | 171.1128        | 324.1918       | 162.5995         |                |                  | <b>L</b> | 1381.8162        | 691.4117        | 1364.7896      | 682.8985         | 1363.8056      | 682.4064         | <b>14</b> |
| 4  | 438.2711        | 219.6392        | 421.2445       | 211.1259         |                |                  | <b>P</b> | 1268.7321        | 634.8697        | 1251.7056      | 626.3564         | 1250.7215      | 625.8644         | <b>13</b> |
| 5  | 537.3395        | 269.1734        | 520.3130       | 260.6601         |                |                  | <b>V</b> | 1171.6793        | 586.3433        | 1154.6528      | 577.8300         | 1153.6688      | 577.3380         | <b>12</b> |
| 6  | 608.3766        | 304.6919        | 591.3501       | 296.1787         |                |                  | <b>A</b> | <b>1072.6109</b> | 536.8091        | 1055.5844      | 528.2958         | 1054.6004      | 527.8038         | <b>11</b> |
| 7  | <b>679.4137</b> | 340.2105        | 662.3872       | 331.6972         |                |                  | <b>A</b> | <b>1001.5738</b> | 501.2905        | 984.5473       | 492.7773         | 983.5633       | 492.2853         | <b>10</b> |
| 8  | 750.4509        | 375.7291        | 733.4423       | 367.2158         |                |                  | <b>A</b> | <b>930.5367</b>  | 465.7720        | 913.5102       | 457.2587         | 912.5261       | 456.7667         | <b>9</b>  |
| 9  | 821.4880        | 411.2476        | 804.4614       | 402.7343         |                |                  | <b>A</b> | <b>859.4996</b>  | 430.2534        | 842.4730       | 421.7402         | 841.4890       | 421.2482         | <b>8</b>  |
| 10 | 935.5309        | 468.2691        | 918.5043       | 459.7558         |                |                  | <b>N</b> | <b>788.4625</b>  | 394.7349        | 771.4359       | 386.2216         | 770.4519       | 385.7296         | <b>7</b>  |
| 11 | 1022.5629       | 511.7851        | 1005.5364      | 503.2718         | 1004.5524      | 502.7798         | <b>S</b> | <b>674.4195</b>  | 337.7134        | 657.3930       | 329.2001         | 656.4090       | 328.7081         | <b>6</b>  |
| 12 | 1135.6470       | 568.3271        | 1118.6204      | 559.8139         | 1117.6364      | 559.3218         | <b>I</b> | <b>587.3875</b>  | 294.1974        | 570.3610       | 285.6841         | 569.3770       | 285.1921         | <b>5</b>  |
| 13 | 1222.6790       | 611.8431        | 1205.6525      | 603.3299         | 1204.6684      | 602.8379         | <b>S</b> | <b>474.3035</b>  | 237.6554        | 457.2769       | 229.1421         | 456.2929       | 228.6501         | <b>4</b>  |
| 14 | 1335.7631       | 668.3852        | 1318.7365      | 659.8719         | 1317.7525      | 659.3799         | <b>L</b> | 387.2714         | 194.1394        | 370.2449       | 185.6261         |                |                  | <b>3</b>  |
| 15 | 1434.8315       | 717.9147        | 1417.8049      | 709.4061         | 1416.8209      | 708.9141         | <b>V</b> | 274.1874         | 137.5973        | 257.1608       | 129.0840         |                |                  | <b>2</b>  |
| 16 |                 |                 |                |                  |                |                  | <b>R</b> | 175.1190         | 88.0631         | 158.0924       | 79.5498          |                |                  | <b>1</b>  |



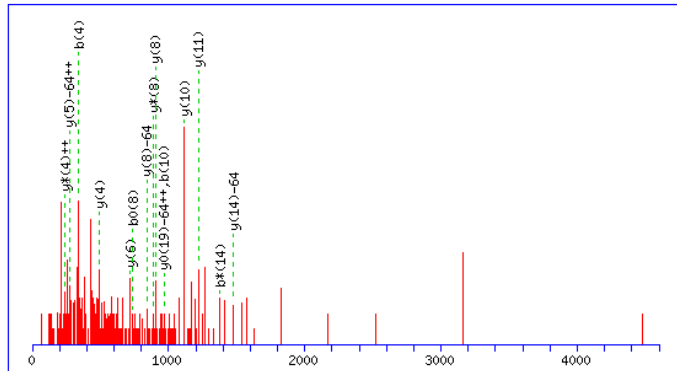

Monoisotopic mass of neutral peptide Mr(calc): 2296.2712  
 Variable modifications:  
 M19 : Oxidation (M), with neutral losses 0.0000 (shown in table), 63.9983  
 Ions Score: 5 Expect: 3.8e+03  
 Matches (Bold Red): 15/346 fragment ions using 51 most intense peaks

| #  | b               | b <sup>++</sup> | b <sup>*</sup>   | b <sup>+++</sup> | b <sup>0</sup>  | b <sup>0++</sup> | Seq. | y                | y <sup>++</sup> | y <sup>*</sup>  | y <sup>+++</sup> | y <sup>0</sup> | y <sup>0++</sup> | #  |
|----|-----------------|-----------------|------------------|------------------|-----------------|------------------|------|------------------|-----------------|-----------------|------------------|----------------|------------------|----|
| 1  | 72.0444         | 36.5258         |                  |                  |                 |                  | A    |                  |                 |                 |                  |                |                  | 22 |
| 2  | 171.1128        | 86.0600         |                  |                  |                 |                  | V    | 2226.2414        | 1113.6243       | 2209.2148       | 1105.1111        | 2208.2308      | 1104.6191        | 21 |
| 3  | 284.1969        | 142.6021        |                  |                  |                 |                  | L    | 2127.1730        | 1064.0901       | 2110.1464       | 1055.5769        | 2109.1624      | 1055.0848        | 20 |
| 4  | <b>341.2183</b> | 171.1128        |                  |                  |                 |                  | G    | 2014.0889        | 1007.5481       | 1997.0624       | 999.0348         | 1996.0783      | 998.5428         | 19 |
| 5  | 454.3024        | 227.6548        |                  |                  |                 |                  | L    | 1957.0674        | 979.0374        | 1940.0409       | 970.5241         | 1939.0569      | 970.0321         | 18 |
| 6  | 555.3501        | 278.1787        |                  |                  | 537.3395        | 269.1734         | T    | 1843.9834        | 922.4953        | 1826.9568       | 913.9821         | 1825.9728      | 913.4900         | 17 |
| 7  | 654.4185        | 327.7129        |                  |                  | 636.4079        | 318.7076         | V    | 1742.9357        | 871.9715        | 1725.9092       | 863.4582         | 1724.9251      | 862.9662         | 16 |
| 8  | 755.4662        | 378.2367        |                  |                  | <b>737.4556</b> | 369.2314         | T    | 1643.8673        | 822.4373        | 1626.8407       | 813.9240         | 1625.8567      | 813.4320         | 15 |
| 9  | 852.5189        | 426.7631        |                  |                  | 834.5084        | 417.7578         | P    | 1542.8196        | 771.9134        | 1525.7931       | 763.4002         | 1524.8090      | 762.9082         | 14 |
| 10 | <b>966.5619</b> | 483.7846        | 949.5353         | 475.2713         | 948.5513        | 474.7793         | N    | 1445.7668        | 723.3871        | 1428.7403       | 714.8738         | 1427.7563      | 714.3818         | 13 |
| 11 | 1079.6459       | 540.3266        | 1062.6194        | 531.8133         | 1061.6354       | 531.3213         | I    | 1331.7239        | 666.3656        | 1314.6974       | 657.8523         | 1313.7134      | 657.3603         | 12 |
| 12 | 1180.6936       | 590.8504        | 1163.6671        | 582.3372         | 1162.6830       | 581.8452         | T    | <b>1218.6399</b> | 609.8236        | 1201.6133       | 601.3103         | 1200.6293      | 600.8183         | 11 |
| 13 | 1277.7464       | 639.3768        | 1260.7198        | 630.8635         | 1259.7358       | 630.3715         | P    | <b>1117.5922</b> | 559.2997        | 1100.5656       | 550.7865         | 1099.5816      | 550.2944         | 10 |
| 14 | 1392.7733       | 696.8903        | <b>1375.7468</b> | 688.3770         | 1374.7627       | 687.8850         | D    | 1020.5394        | 510.7733        | 1003.5129       | 502.2601         | 1002.5288      | 501.7681         | 9  |
| 15 | 1449.7948       | 725.4010        | 1432.7682        | 716.8878         | 1431.7842       | 716.3957         | G    | <b>905.5125</b>  | 453.2599        | <b>888.4859</b> | 444.7466         | 887.5019       | 444.2546         | 8  |
| 16 | 1577.8534       | 789.4303        | 1560.8268        | 780.9170         | 1559.8428       | 780.4250         | Q    | 848.4910         | 424.7491        | 831.4645        | 416.2359         | 830.4804       | 415.7439         | 7  |
| 17 | 1690.9374       | 845.9723        | 1673.9109        | 837.4591         | 1672.9268       | 836.9671         | I    | <b>720.4324</b>  | 360.7199        | 703.4059        | 352.2066         | 702.4219       | 351.7146         | 6  |
| 18 | 1804.0215       | 902.5144        | 1786.9949        | 894.0011         | 1786.0109       | 893.5091         | I    | 607.3484         | 304.1778        | 590.3218        | 295.6645         | 589.3378       | 295.1725         | 5  |
| 19 | 1951.0569       | 976.0321        | 1934.0303        | 967.5188         | 1933.0463       | 967.0268         | M    | <b>494.2643</b>  | 247.6358        | 477.2378        | <b>239.1225</b>  | 476.2537       | 238.6305         | 4  |
| 20 | 2052.1046       | 1026.5559       | 2035.0780        | 1018.0426        | 2034.0940       | 1017.5506        | T    | 347.2289         | 174.1181        | 330.2023        | 165.6048         | 329.2183       | 165.1128         | 3  |
| 21 | 2151.1730       | 1076.0901       | 2134.1464        | 1067.5769        | 2133.1624       | 1067.0848        | V    | 246.1812         | 123.5942        | 229.1547        | 115.0810         |                |                  | 2  |
| 22 |                 |                 |                  |                  |                 |                  | K    | 147.1128         | 74.0600         | 130.0863        | 65.5468          |                |                  | 1  |

# Protein band 89 (+Mn): MafA adhesin

Score: 202

M<sub>r</sub>: 34738

Variable modifications: Carbamidomethyl (C), Oxidation (M)  
 Cleavage by Trypsin: cuts C-term side of KR unless next residue is P  
 Sequence Coverage: 15%

Matched peptides shown in **Bold Red**

1 MRARLLIPIL FSVFILSACG ILTGIPSHGG **GKRFAVEQEL VAASARA**AVK  
 51 DMDLQALHGR KVALYIATMG DQSGSLTGG **RYSIDALIRG EYINSPAVRT**  
 101 DTYPRYETT AETTSGLTIG LTTSLSTLNA PALSRTQSDG SGRSSSLGLN  
 151 IGGMGDYRNE ILTTNPRDTA FLSHLVQTVF FLRGIDVVP ANADTDVFIN  
 201 IDVFGTIRNR TEMHLYNAET **LKAQTKLEYF AVDRITNKKLL IKPKTNAFEA**  
 251 **AYKENYALWM** GPYKVSQGIK PTEGLMVDFFS DIQPGNHTG NSAPSVEADN  
 301 SHEGYGYSDE AVRQHRQGP

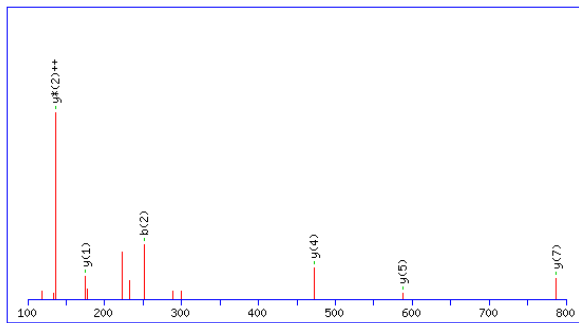

Monoisotopic mass of neutral peptide Mr(calc): 949.5233  
 Ions Score: 36 Expect: 4.4  
 Matches (**Bold Red**): 6/60 fragment ions using 7 most intense peaks

| # | b               | b <sup>++</sup> | b <sup>0</sup> | b <sup>0++</sup> | Seq.     | y               | y <sup>++</sup> | y <sup>*</sup> | y <sup>++</sup> | y <sup>0</sup> | y <sup>0++</sup> | # |
|---|-----------------|-----------------|----------------|------------------|----------|-----------------|-----------------|----------------|-----------------|----------------|------------------|---|
| 1 | 164.0706        | 82.5389         |                |                  | <b>Y</b> |                 |                 |                |                 |                |                  | 8 |
| 2 | <b>251.1026</b> | 126.0550        | 233.0921       | 117.0497         | <b>S</b> | <b>787.4672</b> | 394.2373        | 770.4407       | 385.7240        | 769.4567       | 385.2320         | 7 |
| 3 | 364.1867        | 182.5970        | 346.1761       | 173.5917         | <b>I</b> | 700.4352        | 350.7212        | 683.4087       | 342.2080        | 682.4246       | 341.7160         | 6 |
| 4 | 479.2136        | 240.1105        | 461.2031       | 231.1052         | <b>D</b> | <b>587.3511</b> | 294.1792        | 570.3246       | 285.6659        | 569.3406       | 285.1739         | 5 |
| 5 | 550.2508        | 275.6290        | 532.2402       | 266.6237         | <b>A</b> | <b>472.3242</b> | 236.6657        | 455.2976       | 228.1525        |                |                  | 4 |
| 6 | 663.3348        | 332.1710        | 645.3243       | 323.1658         | <b>L</b> | 401.2871        | 201.1472        | 384.2605       | 192.6339        |                |                  | 3 |
| 7 | 776.4189        | 388.7131        | 758.4083       | 379.7078         | <b>I</b> | 288.2030        | 144.6051        | 271.1765       | <b>136.0919</b> |                |                  | 2 |
| 8 |                 |                 |                |                  | <b>R</b> | <b>175.1190</b> | 88.0631         | 158.0924       | 79.5498         |                |                  | 1 |

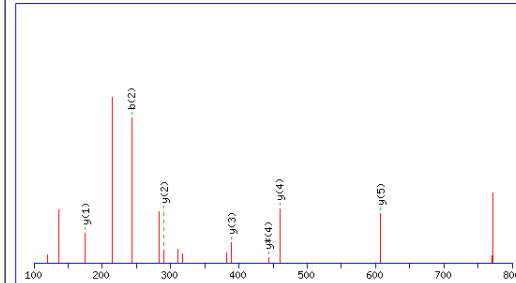

Monoisotopic mass of neutral peptide Mr(calc): 1011.5025  
 Ions Score: 25 Expect: 45  
 Matches (**Bold Red**): 7/66 fragment ions using 15 most intense peaks

| # | b               | b <sup>++</sup> | b <sup>0</sup> | b <sup>0++</sup> | Seq.     | y               | y <sup>++</sup> | y <sup>*</sup>  | y <sup>++</sup> | y <sup>0</sup> | y <sup>0++</sup> | # |
|---|-----------------|-----------------|----------------|------------------|----------|-----------------|-----------------|-----------------|-----------------|----------------|------------------|---|
| 1 | 114.0913        | 57.5493         |                |                  | <b>L</b> |                 |                 |                 |                 |                |                  | 8 |
| 2 | <b>243.1339</b> | 122.0706        | 225.1234       | 113.0653         | <b>E</b> | 899.4258        | 450.2165        | 882.3992        | 441.7032        | 881.4152       | 441.2112         | 7 |
| 3 | 406.1973        | 203.6023        | 388.1867       | 194.5970         | <b>Y</b> | 770.3832        | 385.6952        | 753.3566        | 377.1819        | 752.3726       | 376.6899         | 6 |
| 4 | 553.2657        | 277.1365        | 535.2551       | 268.1312         | <b>F</b> | <b>607.3198</b> | 304.1636        | 590.2933        | 295.6503        | 589.3093       | 295.1583         | 5 |
| 5 | 624.3028        | 312.6550        | 606.2922       | 303.6498         | <b>A</b> | <b>460.2514</b> | 230.6293        | <b>443.2249</b> | 222.1161        | 442.2409       | 221.6241         | 4 |
| 6 | 723.3712        | 362.1892        | 705.3606       | 353.1840         | <b>V</b> | <b>389.2143</b> | 195.1108        | 372.1878        | 186.5975        | 371.2037       | 186.1055         | 3 |
| 7 | 838.3981        | 419.7027        | 820.3876       | 410.6974         | <b>D</b> | <b>290.1459</b> | 145.5766        | 273.1193        | 137.0633        | 272.1353       | 136.5713         | 2 |
| 8 |                 |                 |                |                  | <b>R</b> | <b>175.1190</b> | 88.0631         | 158.0924        | 79.5498         |                |                  | 1 |

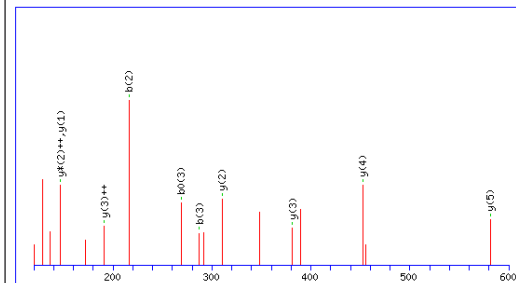

Monoisotopic mass of neutral peptide Mr(calc): 1013.4818  
 Ions Score: 34 Expect: 7.6  
 Matches (**Bold Red**): 10/86 fragment ions using 14 most intense peaks

| # | b               | b <sup>++</sup> | b <sup>*</sup> | b <sup>++</sup> | b <sup>0</sup>  | b <sup>0++</sup> | Seq.     | y               | y <sup>++</sup> | y <sup>*</sup> | y <sup>++</sup> | y <sup>0</sup> | y <sup>0++</sup> | # |
|---|-----------------|-----------------|----------------|-----------------|-----------------|------------------|----------|-----------------|-----------------|----------------|-----------------|----------------|------------------|---|
| 1 | 102.0550        | 51.5311         |                |                 | 84.0444         | 42.5258          | <b>T</b> |                 |                 |                |                 |                |                  | 9 |
| 2 | <b>216.0979</b> | 108.5526        | 199.0713       | 100.0393        | 198.0873        | 99.5473          | <b>N</b> | 913.4414        | 457.2243        | 896.4149       | 448.7111        | 895.4308       | 448.2191         | 8 |
| 3 | <b>287.1350</b> | 144.0711        | 270.1084       | 135.5579        | <b>269.1244</b> | 135.0659         | <b>A</b> | 799.3985        | 400.2029        | 782.3719       | 391.6896        | 781.3879       | 391.1976         | 7 |
| 4 | 434.2034        | 217.6053        | 417.1769       | 209.0921        | 416.1928        | 208.6001         | <b>F</b> | 728.3614        | 364.6843        | 711.3348       | 356.1710        | 710.3508       | 355.6790         | 6 |
| 5 | 563.2460        | 282.1266        | 546.2195       | 273.6134        | 545.2354        | 273.1214         | <b>E</b> | <b>581.2930</b> | 291.1501        | 564.2664       | 282.6368        | 563.2824       | 282.1448         | 5 |
| 6 | 634.2831        | 317.6452        | 617.2566       | 309.1319        | 616.2726        | 308.6399         | <b>A</b> | <b>452.2504</b> | 226.6288        | 435.2238       | 218.1155        |                |                  | 4 |
| 7 | 705.3202        | 353.1638        | 688.2937       | 344.6505        | 687.3097        | 344.1585         | <b>A</b> | <b>381.2132</b> | <b>191.1103</b> | 364.1867       | 182.5970        |                |                  | 3 |
| 8 | 868.3836        | 434.6954        | 851.3570       | 426.1821        | 850.3730        | 425.6901         | <b>Y</b> | <b>310.1761</b> | 155.5917        | 293.1496       | <b>147.0784</b> |                |                  | 2 |
| 9 |                 |                 |                |                 |                 |                  | <b>K</b> | <b>147.1128</b> | 74.0600         | 130.0863       | 65.5468         |                |                  | 1 |

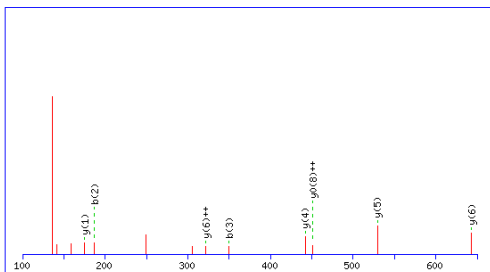

Monoisotopic mass of neutral peptide Mr(calc): 1104.5564  
 Ions Score: 29 Expect: 22  
 Matches (Bold Red): 8/90 Fragment ions using 11 most intense peaks

| #  | b               | b <sup>++</sup> | b <sup>*</sup> | b <sup>***</sup> | b <sup>0</sup> | b <sup>0++</sup> | Seq. | y               | y <sup>++</sup> | y <sup>*</sup> | y <sup>***</sup> | y <sup>0</sup> | y <sup>0++</sup> | #  |
|----|-----------------|-----------------|----------------|------------------|----------------|------------------|------|-----------------|-----------------|----------------|------------------|----------------|------------------|----|
| 1  | 58.0287         | 29.5180         |                |                  |                |                  | G    |                 |                 |                |                  |                |                  | 10 |
| 2  | <b>187.0713</b> | 94.0393         |                |                  | 169.0608       | 85.0340          | E    | 1048.5422       | 524.7747        | 1031.5156      | 516.2615         | 1030.5316      | 515.7694         | 9  |
| 3  | <b>350.1347</b> | 175.5710        |                |                  | 332.1241       | 166.5657         | Y    | 919.4996        | 460.2534        | 902.4730       | 451.7402         | 901.4890       | <b>451.2482</b>  | 8  |
| 4  | 463.2187        | 232.1130        |                |                  | 445.2082       | 223.1077         | I    | 756.4363        | 378.7218        | 739.4097       | 370.2085         | 738.4257       | 369.7165         | 7  |
| 5  | 577.2617        | 289.1345        | 560.2351       | 280.6212         | 559.2511       | 280.1292         | N    | <b>643.3522</b> | <b>322.1797</b> | 626.3256       | 313.6665         | 625.3416       | 313.1745         | 6  |
| 6  | 664.2937        | 332.6505        | 647.2671       | 324.1372         | 646.2831       | 323.6452         | S    | <b>529.3093</b> | 265.1583        | 512.2827       | 256.6450         | 511.2987       | 256.1530         | 5  |
| 7  | 761.3464        | 381.1769        | 744.3199       | 372.6636         | 743.3359       | 372.1716         | P    | <b>442.2772</b> | 221.6423        | 425.2507       | 213.1290         |                |                  | 4  |
| 8  | 832.3836        | 416.6954        | 815.3570       | 408.1821         | 814.3730       | 407.6901         | A    | 345.2245        | 173.1159        | 328.1979       | 164.6026         |                |                  | 3  |
| 9  | 931.4520        | 466.2296        | 914.4254       | 457.7163         | 913.4414       | 457.2243         | V    | 274.1874        | 137.5973        | 257.1608       | 129.0840         |                |                  | 2  |
| 10 |                 |                 |                |                  |                |                  | R    | <b>175.1190</b> | 88.0631         | 158.0924       | 79.5498          |                |                  | 1  |

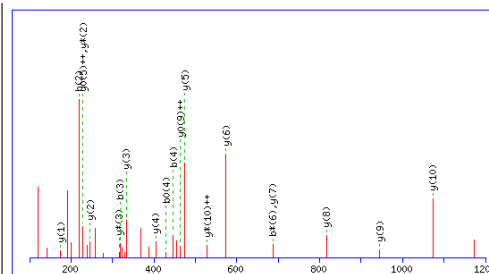

Monoisotopic mass of neutral peptide Mr(calc): 1389.7252  
 Ions Score: 78 Expect: 0.00029  
 Matches (Bold Red): 20/126 Fragment ions using 30 most intense peaks

| #  | b               | b <sup>++</sup> | b <sup>*</sup>  | b <sup>***</sup> | b <sup>0</sup> | b <sup>0++</sup> | Seq. | y                | y <sup>++</sup> | y <sup>*</sup>  | y <sup>***</sup> | y <sup>0</sup> | y <sup>0++</sup> | #  |
|----|-----------------|-----------------|-----------------|------------------|----------------|------------------|------|------------------|-----------------|-----------------|------------------|----------------|------------------|----|
| 1  | 148.0757        | 74.5415         |                 |                  |                |                  | F    |                  |                 |                 |                  |                |                  | 13 |
| 2  | <b>219.1128</b> | 110.0600        |                 |                  |                |                  | A    | 1243.6641        | 622.3357        | 1226.6375       | 613.8224         | 1225.6535      | 613.3304         | 12 |
| 3  | <b>318.1812</b> | 159.5942        |                 |                  |                |                  | V    | 1172.6270        | 586.8171        | 1155.6004       | 578.3039         | 1154.6164      | 577.8118         | 11 |
| 4  | <b>447.2238</b> | 224.1155        |                 |                  |                |                  | E    | <b>1073.5586</b> | 537.2829        | 1056.5320       | <b>528.7696</b>  | 1055.5480      | 528.2776         | 10 |
| 5  | 575.2824        | 288.1448        | 558.2558        | 279.6316         | 557.2718       | 279.1396         | Q    | <b>944.5160</b>  | 472.7616        | 927.4894        | 464.2483         | 926.5054       | <b>463.7563</b>  | 9  |
| 6  | 704.3250        | 352.6661        | <b>687.2984</b> | 344.1529         | 686.3144       | 343.6608         | E    | <b>816.4574</b>  | 408.7323        | 799.4308        | 400.2191         | 798.4468       | 399.7271         | 8  |
| 7  | 817.4090        | 409.2082        | 800.3825        | 400.6949         | 799.3985       | 400.2029         | L    | <b>687.4148</b>  | 344.2110        | 670.3883        | 335.6978         | 669.4042       | 335.2058         | 7  |
| 8  | 916.4775        | 458.7424        | 899.4509        | 450.2291         | 898.4669       | 449.7371         | V    | <b>574.3307</b>  | 287.6690        | 557.3042        | 279.1557         | 556.3202       | 278.6637         | 6  |
| 9  | 987.5146        | 494.2609        | 970.4880        | 485.7477         | 969.5040       | 485.2556         | A    | <b>475.2623</b>  | 238.1348        | 458.2358        | 229.6215         | 457.2518       | <b>229.1295</b>  | 5  |
| 10 | 1058.5517       | 529.7795        | 1041.5251       | 521.2662         | 1040.5411      | 520.7742         | A    | <b>404.2252</b>  | 202.6162        | 387.1987        | 194.1030         | 386.2146       | 193.6110         | 4  |
| 11 | 1145.5837       | 573.2955        | 1128.5572       | 564.7822         | 1127.5732      | 564.2902         | S    | <b>333.1881</b>  | 167.0977        | <b>316.1615</b> | 158.5844         | 315.1775       | 158.0924         | 3  |
| 12 | 1216.6208       | 608.8141        | 1199.5943       | 600.3008         | 1198.6103      | 599.8088         | A    | <b>246.1561</b>  | 123.5817        | <b>229.1295</b> | 115.0684         |                |                  | 2  |
| 13 |                 |                 |                 |                  |                |                  | R    | <b>175.1190</b>  | 88.0631         | 158.0924        | 79.5498          |                |                  | 1  |

# Protein band 93 (+Mn): Outer membrane protein PIII

Score: 249  $M_r$ : 25525

Variable modifications: Carbamidomethyl (C), Oxidation (M)  
 Cleavage by Trypsin: cuts C-term side of KR unless next residue is P  
 Sequence Coverage: 36%

Matched peptides shown in **Bold Red**

1 MTKQLKLSAL FVALLASGTA VAGEASVQGY TVSGQSNEIV RNNYGECWKN  
 51 AYFDKASQGR VECGDVAVP EPEFAPVAVV EQAPQYVDET ISLSAK**TLFG**  
 101 **FDKDSLRAEA QDNLKVLAQR** LSRTNVQSVR VEGHTDFMGS EKYNQALSER  
 151 RAYVWANNLV SNGVPAISRIS AVGLGESQAQ MTQVCQAEVA KLGAKASKAK  
 201 KREALIACIE PDRRDVKIR SIVTRQVVFA RNHHQH

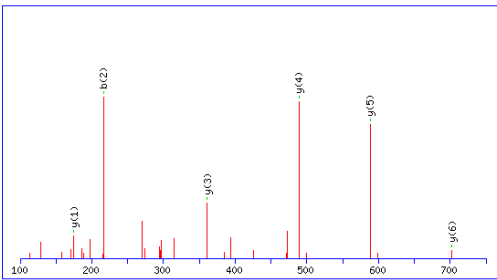

Monoisotopic mass of neutral peptide Mr(calc): 802.4297  
 Ions Score: 55 Expect: 0.075  
 Matches (**Bold Red**): 6/66 fragment ions using 6 most intense peaks

| # | b               | b <sup>++</sup> | b <sup>*</sup> | b <sup>+++</sup> | b <sup>0</sup> | b <sup>0++</sup> | Seq.     | y               | y <sup>++</sup> | y <sup>*</sup> | y <sup>+++</sup> | y <sup>0</sup> | y <sup>0++</sup> | # |
|---|-----------------|-----------------|----------------|------------------|----------------|------------------|----------|-----------------|-----------------|----------------|------------------|----------------|------------------|---|
| 1 | 102.0550        | 51.5311         |                |                  | 84.0444        | 42.5258          | <b>T</b> |                 |                 |                |                  |                |                  | 7 |
| 2 | <b>216.0979</b> | 108.5526        | 199.0713       | 100.0393         | 198.0873       | 99.5473          | <b>N</b> | <b>702.3893</b> | 351.6983        | 685.3628       | 343.1850         | 684.3787       | 342.6930         | 6 |
| 3 | 315.1663        | 158.0868        | 298.1397       | 149.5735         | 297.1557       | 149.0815         | <b>V</b> | <b>588.3464</b> | 294.6768        | 571.3198       | 286.1636         | 570.3358       | 285.6715         | 5 |
| 4 | 443.2249        | 222.1161        | 426.1983       | 213.6028         | 425.2143       | 213.1108         | <b>Q</b> | <b>489.2780</b> | 245.1426        | 472.2514       | 236.6293         | 471.2674       | 236.1373         | 4 |
| 5 | 530.2569        | 265.6321        | 513.2304       | 257.1188         | 512.2463       | 256.6268         | <b>S</b> | <b>361.2194</b> | 181.1133        | 344.1928       | 172.6001         | 343.2088       | 172.1081         | 3 |
| 6 | 629.3253        | 315.1663        | 612.2988       | 306.6530         | 611.3148       | 306.1610         | <b>V</b> | 274.1874        | 137.5973        | 257.1608       | 129.0840         |                |                  | 2 |
| 7 |                 |                 |                |                  |                |                  | <b>R</b> | <b>175.1190</b> | 88.0631         | 158.0924       | 79.5498          |                |                  | 1 |

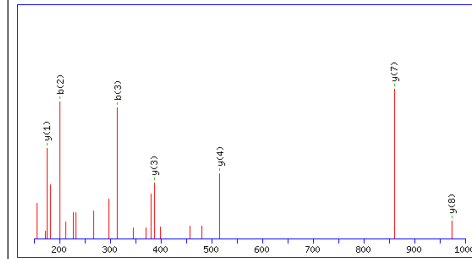

Monoisotopic mass of neutral peptide Mr(calc): 1285.6336  
 Variable modifications:  
 C6 : Carbamidomethyl (C)  
 Ions Score: 38 Expect: 3  
 Matches (**Bold Red**): 7/98 fragment ions using 10 most intense peaks

| #  | b               | b <sup>++</sup> | b <sup>0</sup> | b <sup>0++</sup> | Seq.     | y               | y <sup>++</sup> | y <sup>*</sup> | y <sup>+++</sup> | y <sup>0</sup> | y <sup>0++</sup> | #  |
|----|-----------------|-----------------|----------------|------------------|----------|-----------------|-----------------|----------------|------------------|----------------|------------------|----|
| 1  | 130.0499        | 65.5286         | 112.0393       | 56.5233          | <b>E</b> |                 |                 |                |                  |                |                  | 11 |
| 2  | <b>201.0870</b> | 101.0471        | 183.0764       | 92.0418          | <b>A</b> | 1157.5983       | 579.3028        | 1140.5718      | 570.7895         | 1139.5878      | 570.2975         | 10 |
| 3  | <b>314.1710</b> | 157.5892        | 296.1605       | 148.5839         | <b>L</b> | 1086.5612       | 543.7842        | 1069.5347      | 535.2710         | 1068.5506      | 534.7790         | 9  |
| 4  | 427.2551        | 214.1312        | 409.2445       | 205.1259         | <b>I</b> | <b>973.4771</b> | 487.2422        | 956.4506       | 478.7289         | 955.4666       | 478.2369         | 8  |
| 5  | 498.2922        | 249.6498        | 480.2817       | 240.6445         | <b>A</b> | <b>860.3931</b> | 430.7002        | 843.3665       | 422.1869         | 842.3825       | 421.6949         | 7  |
| 6  | 658.3229        | 329.6651        | 640.3123       | 320.6598         | <b>C</b> | 789.3560        | 395.1816        | 772.3294       | 386.6683         | 771.3454       | 386.1763         | 6  |
| 7  | 771.4069        | 386.2071        | 753.3964       | 377.2018         | <b>I</b> | 629.3253        | 315.1663        | 612.2988       | 306.6530         | 611.3148       | 306.1610         | 5  |
| 8  | 900.4495        | 450.7284        | 882.4390       | 441.7231         | <b>E</b> | <b>516.2413</b> | 258.6243        | 499.2147       | 250.1110         | 498.2307       | 249.6190         | 4  |
| 9  | 997.5023        | 499.2548        | 979.4917       | 490.2495         | <b>P</b> | <b>387.1987</b> | 194.1030        | 370.1721       | 185.5897         | 369.1881       | 185.0977         | 3  |
| 10 | 1112.5292       | 556.7683        | 1094.5187      | 547.7630         | <b>D</b> | 290.1459        | 145.5766        | 273.1193       | 137.0633         | 272.1353       | 136.5713         | 2  |
| 11 |                 |                 |                |                  | <b>R</b> | <b>175.1190</b> | 88.0631         | 158.0924       | 79.5498          |                |                  | 1  |

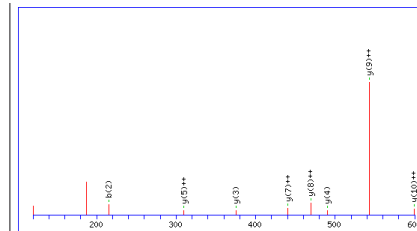

Monoisotopic mass of neutral peptide Mr(calc): 1297.6667  
 Ions Score: 39 Expect: 2.3  
 Matches (**Bold Red**): 8/104 fragment ions using 11 most intense peaks

| #  | b               | b <sup>++</sup> | b <sup>*</sup> | b <sup>+++</sup> | b <sup>0</sup> | b <sup>0++</sup> | Seq.     | y               | y <sup>++</sup> | y <sup>*</sup> | y <sup>+++</sup> | y <sup>0</sup> | y <sup>0++</sup> | #  |
|----|-----------------|-----------------|----------------|------------------|----------------|------------------|----------|-----------------|-----------------|----------------|------------------|----------------|------------------|----|
| 1  | 102.0550        | 51.5311         |                |                  | 84.0444        | 42.5258          | <b>T</b> |                 |                 |                |                  |                |                  | 11 |
| 2  | <b>215.1390</b> | 108.0731        |                |                  | 197.1285       | 99.0679          | <b>L</b> | 1197.6262       | <b>599.3168</b> | 1180.5997      | 590.8035         | 1179.6157      | 590.3115         | 10 |
| 3  | 362.2074        | 181.6074        |                |                  | 344.1969       | 172.6021         | <b>F</b> | 1084.5422       | <b>542.7747</b> | 1067.5156      | 534.2615         | 1066.5316      | 533.7694         | 9  |
| 4  | 419.2289        | 210.1181        |                |                  | 401.2183       | 201.1128         | <b>G</b> | 937.4738        | <b>469.2405</b> | 920.4472       | 460.7272         | 919.4632       | 460.2352         | 8  |
| 5  | 566.2973        | 283.6523        |                |                  | 548.2867       | 274.6470         | <b>F</b> | 880.4523        | <b>440.7298</b> | 863.4258       | 432.2165         | 862.4417       | 431.7245         | 7  |
| 6  | 681.3243        | 341.1658        |                |                  | 663.3137       | 332.1605         | <b>D</b> | 733.3839        | 367.1956        | 716.3573       | 358.6823         | 715.3733       | 358.1903         | 6  |
| 7  | 809.4192        | 405.2132        | 792.3927       | 396.7000         | 791.4087       | 396.2080         | <b>K</b> | 618.3569        | <b>309.6821</b> | 601.3304       | 301.1688         | 600.3464       | 300.6768         | 5  |
| 8  | 924.4462        | 462.7267        | 907.4196       | 454.2134         | 906.4356       | 453.7214         | <b>D</b> | <b>490.2620</b> | 245.6346        | 473.2354       | 237.1214         | 472.2514       | 236.6293         | 4  |
| 9  | 1011.4782       | 506.2427        | 994.4516       | 497.7295         | 993.4676       | 497.2374         | <b>S</b> | <b>375.2350</b> | 188.1212        | 358.2085       | 179.6079         | 357.2245       | 179.1159         | 3  |
| 10 | 1124.5623       | 562.7848        | 1107.5357      | 554.2715         | 1106.5517      | 553.7795         | <b>L</b> | 288.2030        | 144.6051        | 271.1765       | 136.0919         |                |                  | 2  |
| 11 |                 |                 |                |                  |                |                  | <b>R</b> | <b>175.1190</b> | 88.0631         | 158.0924       | 79.5498          |                |                  | 1  |

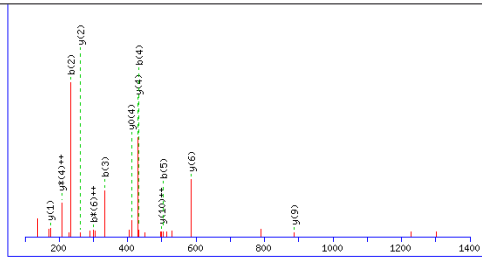

Monoisotopic mass of neutral peptide Mr(calc): 1729.9111  
 Ions Score: 33 Expect: 7  
 Matches (Bold Red): 13/162 fragment ions using 25 most intense peaks

| #  | b               | b <sup>++</sup> | b <sup>*</sup> | b <sup>+++</sup> | b <sup>0</sup> | b <sup>0++</sup> | Seq. | y               | y <sup>++</sup> | y <sup>*</sup> | y <sup>+++</sup> | y <sup>0</sup>  | y <sup>0++</sup> | #  |
|----|-----------------|-----------------|----------------|------------------|----------------|------------------|------|-----------------|-----------------|----------------|------------------|-----------------|------------------|----|
| 1  | 72.0444         | 36.5258         |                |                  |                |                  | A    |                 |                 |                |                  |                 |                  | 17 |
| 2  | <b>235.1077</b> | 118.0575        |                |                  |                |                  | Y    | 1659.8813       | 830.4443        | 1642.8547      | 821.9310         | 1641.8707       | 821.4390         | 16 |
| 3  | <b>334.1761</b> | 167.5917        |                |                  |                |                  | V    | 1496.8180       | 748.9126        | 1479.7914      | 740.3993         | 1478.8074       | 739.9073         | 15 |
| 4  | <b>433.2445</b> | 217.1259        |                |                  |                |                  | V    | 1397.7496       | 699.3784        | 1380.7230      | 690.8651         | 1379.7390       | 690.3731         | 14 |
| 5  | <b>504.2817</b> | 252.6445        |                |                  |                |                  | A    | 1298.6811       | 649.8442        | 1281.6546      | 641.3309         | 1280.6706       | 640.8389         | 13 |
| 6  | 618.3246        | 309.6659        | 601.2980       | <b>301.1527</b>  |                |                  | N    | 1227.6440       | 614.3256        | 1210.6175      | 605.8124         | 1209.6335       | 605.3204         | 12 |
| 7  | 732.3675        | 366.6874        | 715.3410       | 358.1741         |                |                  | N    | 1113.6011       | 557.3042        | 1096.5745      | 548.7909         | 1095.5905       | 548.2989         | 11 |
| 8  | 845.4516        | 423.2294        | 828.4250       | 414.7162         |                |                  | L    | 999.5582        | <b>500.2827</b> | 982.5316       | 491.7694         | 981.5476        | 491.2774         | 10 |
| 9  | 944.5200        | 472.7636        | 927.4934       | 464.2504         |                |                  | V    | <b>896.4741</b> | 443.7407        | 869.4476       | 435.2274         | 868.4635        | 434.7354         | 9  |
| 10 | 1031.5520       | 516.2796        | 1014.5255      | 507.7664         | 1013.5415      | 507.2744         | S    | 787.4057        | 394.2065        | 770.3791       | 385.6932         | 769.3951        | 385.2012         | 8  |
| 11 | 1145.5949       | 573.3011        | 1128.5684      | 564.7878         | 1127.5844      | 564.2958         | N    | 700.3737        | 350.6905        | 683.3471       | 342.1772         | 682.3631        | 341.6852         | 7  |
| 12 | 1202.6164       | 601.8118        | 1185.5899      | 593.2986         | 1184.6058      | 592.8066         | G    | <b>586.3307</b> | 293.6690        | 569.3042       | 285.1557         | 568.3202        | 284.6637         | 6  |
| 13 | 1301.6848       | 651.3461        | 1284.6583      | 642.8328         | 1283.6743      | 642.3408         | V    | 529.3093        | 265.1583        | 512.2827       | 256.6450         | 511.2987        | 256.1530         | 5  |
| 14 | 1398.7376       | 699.8724        | 1381.7110      | 691.3592         | 1380.7270      | 690.8672         | P    | <b>430.2409</b> | 215.6241        | 413.2143       | <b>207.1108</b>  | <b>412.2303</b> | 206.6188         | 4  |
| 15 | 1469.7747       | 735.3910        | 1452.7482      | 726.8777         | 1451.7641      | 726.3857         | A    | 333.1881        | 167.0977        | 316.1615       | 158.5844         | 315.1775        | 158.0924         | 3  |
| 16 | 1556.8067       | 778.9070        | 1539.7802      | 770.3937         | 1538.7962      | 769.9017         | S    | <b>262.1510</b> | 131.5791        | 245.1244       | 123.0659         | 244.1404        | 122.5738         | 2  |
| 17 |                 |                 |                |                  |                |                  | R    | <b>175.1190</b> | 88.0631         | 158.0924       | 79.5498          |                 |                  | 1  |

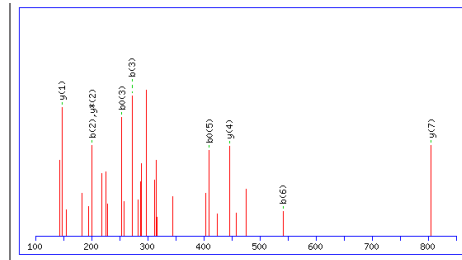

Monoisotopic mass of neutral peptide Mr(calc): 2420.1676  
 Variable modifications:  
 M13 : Oxidation (S), with neutral losses 0.0000 (shown in table), 63.9983  
 C17 : Carbamidomethyl (C)  
 Ions Score: 19 Expect: 1.5e+02  
 Matches (Bold Red): 9/370 fragment ions using 15 most intense peaks

| #  | b               | b <sup>++</sup> | b <sup>*</sup> | b <sup>+++</sup> | b <sup>0</sup>  | b <sup>0++</sup> | Seq. | y               | y <sup>++</sup> | y <sup>*</sup>  | y <sup>+++</sup> | y <sup>0</sup> | y <sup>0++</sup> | #  |
|----|-----------------|-----------------|----------------|------------------|-----------------|------------------|------|-----------------|-----------------|-----------------|------------------|----------------|------------------|----|
| 1  | 114.0913        | 57.5493         |                |                  |                 |                  | I    |                 |                 |                 |                  |                |                  | 23 |
| 2  | <b>201.1234</b> | 101.0653        |                |                  | 183.1128        | 92.0600          | S    | 2308.0908       | 1154.5490       | 2291.0642       | 1146.0358        | 2290.0802      | 1145.5437        | 22 |
| 3  | <b>272.1605</b> | 136.5839        |                |                  | <b>254.1499</b> | 127.5786         | A    | 2221.0588       | 1111.0330       | 2204.0322       | 1102.5197        | 2203.0482      | 1102.0277        | 21 |
| 4  | 371.2289        | 186.1181        |                |                  | 353.2183        | 177.1128         | V    | 2150.0216       | 1075.5145       | 2132.9951       | 1067.0012        | 2132.0111      | 1066.5092        | 20 |
| 5  | 428.2504        | 214.6288        |                |                  | <b>410.2398</b> | 205.6235         | G    | 2050.9532       | 1025.9803       | 2033.9267       | 1017.4670        | 2032.9427      | 1016.9750        | 19 |
| 6  | <b>541.3344</b> | 271.1709        |                |                  | 523.3239        | 262.1656         | L    | 1993.9318       | 997.4695        | 1976.9052       | 988.9562         | 1975.9212      | 988.4642         | 18 |
| 7  | 598.3559        | 299.6816        |                |                  | 580.3453        | 290.6763         | G    | 1880.8477       | 940.9275        | 1863.8212       | 932.4142         | 1862.8371      | 931.9222         | 17 |
| 8  | 727.3985        | 364.2029        |                |                  | 709.3879        | 355.1976         | E    | 1823.8262       | 912.4168        | 1806.7997       | 903.9035         | 1805.8157      | 903.4115         | 16 |
| 9  | 814.4305        | 407.7189        |                |                  | 796.4199        | 398.7136         | S    | 1694.7836       | 847.8955        | 1677.7571       | 839.3822         | 1676.7731      | 838.8902         | 15 |
| 10 | 942.4891        | 471.7482        | 925.4625       | 463.2349         | 924.4785        | 462.7429         | Q    | 1607.7516       | 804.3794        | 1590.7251       | 795.8662         | 1589.7411      | 795.3742         | 14 |
| 11 | 1013.5262       | 507.2667        | 996.4997       | 498.7535         | 995.5156        | 498.2615         | A    | 1479.6930       | 740.3502        | 1462.6665       | 731.8369         | 1461.6825      | 731.3449         | 13 |
| 12 | 1141.5848       | 571.2960        | 1124.5582      | 562.7828         | 1123.5742       | 562.2907         | Q    | 1408.6559       | 704.8316        | 1391.6294       | 696.3183         | 1390.6454      | 695.8263         | 12 |
| 13 | 1288.6202       | 644.8137        | 1271.5936      | 636.3005         | 1270.6096       | 635.8084         | M    | 1280.5973       | 640.8023        | 1263.5708       | 632.2890         | 1262.5868      | 631.7970         | 11 |
| 14 | 1389.6679       | 695.3376        | 1372.6413      | 686.8243         | 1371.6573       | 686.3323         | T    | 1133.5619       | 567.2846        | 1116.5354       | 558.7713         | 1115.5514      | 558.2793         | 10 |
| 15 | 1517.7264       | 759.3669        | 1500.6999      | 750.8536         | 1499.7159       | 750.3616         | Q    | 1032.5143       | 516.7608        | 1015.4877       | 508.2475         | 1014.5037      | 507.7555         | 9  |
| 16 | 1616.7949       | 808.9011        | 1599.7683      | 800.3878         | 1598.7843       | 799.8958         | V    | 904.4557        | 452.7315        | 887.4291        | 444.2182         | 886.4451       | 443.7262         | 8  |
| 17 | 1776.8255       | 888.9164        | 1759.7990      | 880.4031         | 1758.8149       | 879.9111         | C    | <b>805.3873</b> | 403.1973        | 788.3607        | 394.6840         | 787.3767       | 394.1920         | 7  |
| 18 | 1904.8841       | 952.9457        | 1887.8575      | 944.4324         | 1886.8735       | 943.9404         | Q    | 645.3566        | 323.1819        | 628.3301        | 314.6687         | 627.3461       | 314.1767         | 6  |
| 19 | 1975.9212       | 988.4642        | 1958.8947      | 979.9510         | 1957.9106       | 979.4590         | A    | 517.2980        | 259.1527        | 500.2715        | 250.6394         | 499.2875       | 250.1474         | 5  |
| 20 | 2104.9638       | 1052.9855       | 2087.9372      | 1044.4723        | 2086.9532       | 1043.9803        | E    | <b>446.2609</b> | 223.6341        | 429.2344        | 215.1208         | 428.2504       | 214.6288         | 4  |
| 21 | 2204.0322       | 1102.5197       | 2187.0057      | 1094.0065        | 2186.0216       | 1093.5145        | V    | 317.2183        | 159.1128        | 300.1918        | 150.5995         |                |                  | 3  |
| 22 | 2275.0693       | 1138.0383       | 2258.0428      | 1129.5250        | 2257.0588       | 1129.0330        | A    | 218.1499        | 109.5786        | <b>201.1234</b> | 101.0653         |                |                  | 2  |
| 23 |                 |                 |                |                  |                 |                  | K    | <b>147.1128</b> | 74.0600         | 130.0863        | 65.5468          |                |                  | 1  |



# Protein band 146 (-Mn): Opa protein

Variable modifications: Carbamidomethyl (C), Oxidation (M)  
 Cleavage by Trypsin: cuts C-term side of KR unless next residue is P  
 Sequence Coverage: 3%

Score: 70

M<sub>r</sub>: 28339

Matched peptides shown in **Bold Red**

1 LFSSLLFSSA AQAASVDNGR GPYVQADLTY AAERITHNYP EATGADKGI  
 51 **STVSDYFR**NI RTHSVQPRLS LGYDFGNWRI AADYTRYRKW NENNSSTKKV  
 101 TERINDNNKE TKTEHQENG S FHAASSLGLS AIYDFQISDK FKPYIGARVA  
 151 YGHVRHQVNS VNKETITVTP MGGGSIIQGP TSKPAYHESH SIRRLGLGVI  
 201 AGVGF DITSN LILDAGY RY NWGRLENTRF KTHEASLGMR Y

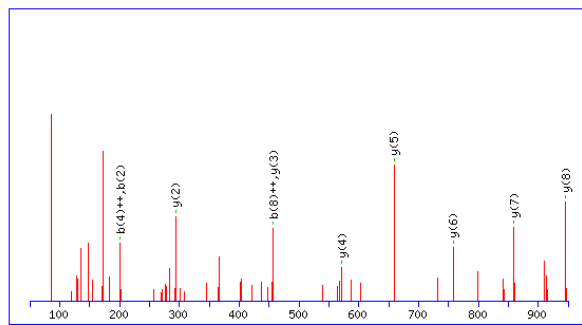

Monoisotopic mass of neutral peptide Mr(calc): 1058.5284  
 Ions Score: 70 Expect: 0.0019  
 Matches (**Bold Red**): 10/72 fragment ions using 10 most intense peaks

| # | b               | b <sup>++</sup> | b <sup>0</sup> | b <sup>0++</sup> | Seq. | y               | y <sup>++</sup> | y <sup>+</sup> | y <sup>+++</sup> | y <sup>0</sup> | y <sup>0++</sup> | # |
|---|-----------------|-----------------|----------------|------------------|------|-----------------|-----------------|----------------|------------------|----------------|------------------|---|
| 1 | 114.0913        | 57.5493         |                |                  | I    |                 |                 |                |                  |                |                  | 9 |
| 2 | <b>201.1234</b> | 101.0653        | 183.1128       | 92.0600          | S    | <b>946.4516</b> | 473.7295        | 929.4251       | 465.2162         | 928.4411       | 464.7242         | 8 |
| 3 | 302.1710        | 151.5892        | 284.1605       | 142.5839         | T    | <b>859.4196</b> | 430.2134        | 842.3931       | 421.7002         | 841.4090       | 421.2082         | 7 |
| 4 | 401.2395        | <b>201.1234</b> | 383.2289       | 192.1181         | V    | <b>758.3719</b> | 379.6896        | 741.3454       | 371.1763         | 740.3614       | 370.6843         | 6 |
| 5 | 488.2715        | 244.6394        | 470.2609       | 235.6341         | S    | <b>659.3035</b> | 330.1554        | 642.2770       | 321.6421         | 641.2930       | 321.1501         | 5 |
| 6 | 603.2984        | 302.1529        | 585.2879       | 293.1476         | D    | <b>572.2715</b> | 286.6394        | 555.2449       | 278.1261         | 554.2609       | 277.6341         | 4 |
| 7 | 766.3618        | 383.6845        | 748.3512       | 374.6792         | Y    | <b>457.2445</b> | 229.1259        | 440.2180       | 220.6126         |                |                  | 3 |
| 8 | 913.4302        | <b>457.2187</b> | 895.4196       | 448.2134         | F    | <b>294.1812</b> | 147.5942        | 277.1547       | 139.0810         |                |                  | 2 |
| 9 |                 |                 |                |                  | K    | 147.1128        | 74.0600         | 130.0863       | 65.5468          |                |                  | 1 |
